# Supplementary material for: Discrete spatial organization of TGFβ receptors couples receptor multimerization and signaling to cellular tension
Source: eLife. 2015 Dec 10;4:e09300. doi: 10.7554/eLife.09300 (PMC4728123; doi:10.7554/eLife.09300)
Supplement: Figure 3—source data 1. — DOI: http://dx.doi.org/10.7554/eLife.09300.008 [file elife-09300-fig3-data1.xlsx]

## Sheet: FIG 3A-C
Representative raw data for Figures 3 A-C
Alk5 and integrin alpha2 colocalization quantification (Figure 3Bi)
Max Intensity	Min Intensity	Normalized
3	1	0.0117647	0.00392157
1	0	0.00392157	0
1	0	0.00392157	0
3	1	0.0117647	0.00392157
3	1	0.0117647	0.00392157
2	0	0.00784314	0
1	1	0.00392157	0.00392157
3	1	0.0117647	0.00392157
1	1	0.00392157	0.00392157
1	0	0.00392157	0
2	0	0.00784314	0
2	0	0.00784314	0
0	0	0	0
0	0	0	0
4	1	0.0156863	0.00392157
6	1	0.0235294	0.00392157
5	0	0.0196078	0
1	0	0.00392157	0
1	0	0.00392157	0
7	1	0.027451	0.00392157
12	0	0.0470588	0
9	0	0.0352941	0
4	0	0.0156863	0
2	1	0.00784314	0.00392157
2	1	0.00784314	0.00392157
1	1	0.00392157	0.00392157
2	1	0.00784314	0.00392157
2	1	0.00784314	0.00392157
1	1	0.00392157	0.00392157
1	1	0.00392157	0.00392157
4	0	0.0156863	0
7	0	0.027451	0
1	1	0.00392157	0.00392157
0	0	0	0
1	0	0.00392157	0
2	1	0.00784314	0.00392157
3	0	0.0117647	0
1	1	0.00392157	0.00392157
2	0	0.00784314	0
0	0	0	0
1	0	0.00392157	0
0	0	0	0
0	0	0	0
0	0	0	0
1	0	0.00392157	0
4	1	0.0156863	0.00392157
6	1	0.0235294	0.00392157
8	1	0.0313725	0.00392157
6	1	0.0235294	0.00392157
2	0	0.00784314	0
0	0	0	0
1	0	0.00392157	0
5	1	0.0196078	0.00392157
8	2	0.0313725	0.00784314
8	1	0.0313725	0.00392157
7	1	0.027451	0.00392157
5	1	0.0196078	0.00392157
2	1	0.00784314	0.00392157
0	0	0	0
1	0	0.00392157	0
2	0	0.00784314	0
1	0	0.00392157	0
1	0	0.00392157	0
1	0	0.00392157	0
1	0	0.00392157	0
1	0	0.00392157	0
1	0	0.00392157	0
2	1	0.00784314	0.00392157
5	0	0.0196078	0
2	0	0.00784314	0
1	0	0.00392157	0
2	1	0.00784314	0.00392157
1	0	0.00392157	0
1	1	0.00392157	0.00392157
2	1	0.00784314	0.00392157
2	1	0.00784314	0.00392157
1	1	0.00392157	0.00392157
1	0	0.00392157	0
0	0	0	0
0	0	0	0
1	0	0.00392157	0
1	0	0.00392157	0
2	1	0.00784314	0.00392157
2	1	0.00784314	0.00392157
1	0	0.00392157	0
1	1	0.00392157	0.00392157
2	1	0.00784314	0.00392157
1	0	0.00392157	0
7	0	0.027451	0
4	0	0.0156863	0
2	1	0.00784314	0.00392157
1	1	0.00392157	0.00392157
3	2	0.0117647	0.00784314
4	1	0.0156863	0.00392157
4	1	0.0156863	0.00392157
4	1	0.0156863	0.00392157
6	1	0.0235294	0.00392157
1	1	0.00392157	0.00392157
1	0	0.00392157	0
5	1	0.0196078	0.00392157
6	1	0.0235294	0.00392157
3	1	0.0117647	0.00392157
2	1	0.00784314	0.00392157
3	1	0.0117647	0.00392157
5	2	0.0196078	0.00784314
4	3	0.0156863	0.0117647
1	0	0.00392157	0
3	0	0.0117647	0
13	3	0.0509804	0.0117647
10	9	0.0392157	0.0352941
8	8	0.0313725	0.0313725
8	3	0.0313725	0.0117647
5	3	0.0196078	0.0117647
8	6	0.0313725	0.0235294
13	6	0.0509804	0.0235294
20	4	0.0784314	0.0156863
22	7	0.0862745	0.027451
19	11	0.0745098	0.0431373
17	14	0.0666667	0.054902
18	17	0.0705882	0.0666667
29	15	0.113725	0.0588235
31	14	0.121569	0.054902
25	12	0.0980392	0.0470588
22	13	0.0862745	0.0509804
27	14	0.105882	0.054902
32	19	0.12549	0.0745098
41	25	0.160784	0.0980392
55	31	0.215686	0.121569
58	18	0.227451	0.0705882
67	27	0.262745	0.105882
81	30	0.317647	0.117647
99	42	0.388235	0.164706
116	60	0.454902	0.235294
130	86	0.509804	0.337255
139	101	0.545098	0.396078
143	128	0.560784	0.501961
137	136	0.537255	0.533333
141	141	0.552941	0.552941
157	147	0.615686	0.576471
176	153	0.690196	0.6
187	152	0.733333	0.596078
182	133	0.713725	0.521569
157	100	0.615686	0.392157
128	76	0.501961	0.298039
100	61	0.392157	0.239216
82	57	0.321569	0.223529
80	48	0.313725	0.188235
55	39	0.215686	0.152941
36	36	0.141176	0.141176
39	33	0.152941	0.129412
48	26	0.188235	0.101961
36	21	0.141176	0.0823529
27	17	0.105882	0.0666667
29	16	0.113725	0.0627451
34	19	0.133333	0.0745098
38	24	0.14902	0.0941176
33	23	0.129412	0.0901961
22	16	0.0862745	0.0627451
19	9	0.0745098	0.0352941
23	6	0.0901961	0.0235294
21	1	0.0823529	0.00392157
15	0	0.0588235	0
14	1	0.054902	0.00392157
21	2	0.0823529	0.00784314
25	0	0.0980392	0
20	0	0.0784314	0
19	2	0.0745098	0.00784314
25	2	0.0980392	0.00784314
22	2	0.0862745	0.00784314
22	1	0.0862745	0.00392157
20	0	0.0784314	0
15	0	0.0588235	0
15	0	0.0588235	0
18	0	0.0705882	0
19	1	0.0745098	0.00392157
17	2	0.0666667	0.00784314
17	1	0.0666667	0.00392157
15	1	0.0588235	0.00392157
14	1	0.054902	0.00392157
15	1	0.0588235	0.00392157
14	0	0.054902	0
13	0	0.0509804	0
18	1	0.0705882	0.00392157
23	2	0.0901961	0.00784314
15	1	0.0588235	0.00392157
12	1	0.0470588	0.00392157
16	0	0.0627451	0
23	0	0.0901961	0
25	1	0.0980392	0.00392157
23	2	0.0901961	0.00784314
20	5	0.0784314	0.0196078
18	7	0.0705882	0.027451
22	5	0.0862745	0.0196078
21	4	0.0823529	0.0156863
14	4	0.054902	0.0156863
15	6	0.0588235	0.0235294
15	8	0.0588235	0.0313725
10	7	0.0392157	0.027451
14	5	0.054902	0.0196078
17	2	0.0666667	0.00784314
15	0	0.0588235	0
10	0	0.0392157	0
8	1	0.0313725	0.00392157
7	1	0.027451	0.00392157
4	2	0.0156863	0.00784314
2	2	0.00784314	0.00784314
3	3	0.0117647	0.0117647
3	2	0.0117647	0.00784314
2	0	0.00784314	0
1	0	0.00392157	0
1	0	0.00392157	0
0	0	0	0
0	0	0	0
0	0	0	0
1	1	0.00392157	0.00392157
2	1	0.00784314	0.00392157
1	1	0.00392157	0.00392157
1	0	0.00392157	0
1	0	0.00392157	0
1	1	0.00392157	0.00392157
1	1	0.00392157	0.00392157
2	1	0.00784314	0.00392157
1	0	0.00392157	0
1	0	0.00392157	0
1	1	0.00392157	0.00392157
4	1	0.0156863	0.00392157
1	0	0.00392157	0
1	0	0.00392157	0
3	1	0.0117647	0.00392157
2	1	0.00784314	0.00392157
2	0	0.00784314	0
1	0	0.00392157	0
2	1	0.00784314	0.00392157
1	0	0.00392157	0
1	0	0.00392157	0
2	0	0.00784314	0
2	0	0.00784314	0
0	0	0	0
1	0	0.00392157	0
5	1	0.0196078	0.00392157
6	1	0.0235294	0.00392157
4	0	0.0156863	0
1	1	0.00392157	0.00392157
1	1	0.00392157	0.00392157
6	1	0.0235294	0.00392157
10	0	0.0392157	0
8	0	0.0313725	0
4	0	0.0156863	0
2	1	0.00784314	0.00392157
2	1	0.00784314	0.00392157
1	1	0.00392157	0.00392157
2	1	0.00784314	0.00392157
2	1	0.00784314	0.00392157
1	1	0.00392157	0.00392157
1	0	0.00392157	0
3	0	0.0117647	0
6	0	0.0235294	0
3	1	0.0117647	0.00392157
1	0	0.00392157	0
2	1	0.00784314	0.00392157
2	1	0.00784314	0.00392157
3	0	0.0117647	0
2	0	0.00784314	0
1	0	0.00392157	0
1	0	0.00392157	0
1	1	0.00392157	0.00392157
2	0	0.00784314	0
2	0	0.00784314	0
1	0	0.00392157	0
1	0	0.00392157	0
1	1	0.00392157	0.00392157
2	1	0.00784314	0.00392157
4	1	0.0156863	0.00392157
3	1	0.0117647	0.00392157
3	0	0.0117647	0
3	0	0.0117647	0
3	1	0.0117647	0.00392157
4	1	0.0156863	0.00392157
5	2	0.0196078	0.00784314
4	1	0.0156863	0.00392157
4	1	0.0156863	0.00392157
1	0	0.00392157	0
1	0	0.00392157	0
0	0	0	0
3	0	0.0117647	0
3	0	0.0117647	0
0	0	0	0
1	0	0.00392157	0
2	1	0.00784314	0.00392157
6	1	0.0235294	0.00392157
4	1	0.0156863	0.00392157
2	1	0.00784314	0.00392157
4	1	0.0156863	0.00392157
6	0	0.0235294	0
2	0	0.00784314	0
1	0	0.00392157	0
2	0	0.00784314	0
1	0	0.00392157	0
1	1	0.00392157	0.00392157
3	1	0.0117647	0.00392157
2	1	0.00784314	0.00392157
1	0	0.00392157	0
1	0	0.00392157	0
3	0	0.0117647	0
6	0	0.0235294	0
3	1	0.0117647	0.00392157
3	1	0.0117647	0.00392157
3	1	0.0117647	0.00392157
2	1	0.00784314	0.00392157
1	0	0.00392157	0
1	0	0.00392157	0
2	1	0.00784314	0.00392157
1	0	0.00392157	0
7	0	0.027451	0
6	0	0.0235294	0
5	1	0.0196078	0.00392157
5	1	0.0196078	0.00392157
5	2	0.0196078	0.00784314
6	1	0.0235294	0.00392157
7	1	0.027451	0.00392157
7	1	0.027451	0.00392157
7	1	0.027451	0.00392157
3	1	0.0117647	0.00392157
3	1	0.0117647	0.00392157
7	1	0.027451	0.00392157
7	1	0.027451	0.00392157
3	1	0.0117647	0.00392157
2	1	0.00784314	0.00392157
4	1	0.0156863	0.00392157
5	4	0.0196078	0.0156863
6	1	0.0235294	0.00392157
6	2	0.0235294	0.00784314
5	4	0.0196078	0.0156863
10	3	0.0392157	0.0117647
16	12	0.0627451	0.0470588
17	15	0.0666667	0.0588235
10	3	0.0392157	0.0117647
12	4	0.0470588	0.0156863
10	5	0.0392157	0.0196078
8	4	0.0313725	0.0156863
12	3	0.0470588	0.0117647
12	9	0.0470588	0.0352941
15	9	0.0588235	0.0352941
16	7	0.0627451	0.027451
16	8	0.0627451	0.0313725
18	11	0.0705882	0.0431373
17	13	0.0666667	0.0509804
15	10	0.0588235	0.0392157
14	8	0.054902	0.0313725
14	12	0.054902	0.0470588
16	15	0.0627451	0.0588235
22	21	0.0862745	0.0823529
33	27	0.129412	0.105882
34	17	0.133333	0.0666667
45	24	0.176471	0.0941176
62	24	0.243137	0.0941176
81	30	0.317647	0.117647
95	41	0.372549	0.160784
105	61	0.411765	0.239216
113	70	0.443137	0.27451
118	93	0.462745	0.364706
126	96	0.494118	0.376471
136	105	0.533333	0.411765
152	128	0.596078	0.501961
166	161	0.65098	0.631373
188	166	0.737255	0.65098
192	143	0.752941	0.560784
174	112	0.682353	0.439216
153	93	0.6	0.364706
127	79	0.498039	0.309804
114	73	0.447059	0.286275
113	62	0.443137	0.243137
85	52	0.333333	0.203922
63	46	0.247059	0.180392
55	43	0.215686	0.168627
57	40	0.223529	0.156863
45	39	0.176471	0.152941
35	34	0.137255	0.133333
39	28	0.152941	0.109804
40	24	0.156863	0.0941176
36	23	0.141176	0.0901961
30	22	0.117647	0.0862745
25	16	0.0980392	0.0627451
23	9	0.0901961	0.0352941
23	5	0.0901961	0.0196078
22	1	0.0862745	0.00392157
21	0	0.0823529	0
24	1	0.0941176	0.00392157
31	1	0.121569	0.00392157
31	0	0.121569	0
22	0	0.0862745	0
17	1	0.0666667	0.00392157
22	1	0.0862745	0.00392157
22	2	0.0862745	0.00784314
21	1	0.0823529	0.00392157
17	0	0.0666667	0
14	0	0.054902	0
15	0	0.0588235	0
19	0	0.0745098	0
19	1	0.0745098	0.00392157
16	2	0.0627451	0.00784314
15	1	0.0588235	0.00392157
15	1	0.0588235	0.00392157
15	1	0.0588235	0.00392157
13	0	0.0509804	0
9	0	0.0352941	0
8	0	0.0313725	0
16	1	0.0627451	0.00392157
26	2	0.101961	0.00784314
9	0	0.0352941	0
9	1	0.0352941	0.00392157
13	0	0.0509804	0
18	0	0.0705882	0
19	1	0.0745098	0.00392157
17	2	0.0666667	0.00784314
14	4	0.054902	0.0156863
10	6	0.0392157	0.0235294
15	3	0.0588235	0.0117647
16	1	0.0627451	0.00392157
10	0	0.0392157	0
12	1	0.0470588	0.00392157
12	3	0.0470588	0.0117647
7	4	0.027451	0.0156863
11	2	0.0431373	0.00784314
14	0	0.054902	0
11	0	0.0431373	0
7	0	0.027451	0
5	1	0.0196078	0.00392157
5	1	0.0196078	0.00392157
3	1	0.0117647	0.00392157
2	1	0.00784314	0.00392157
3	1	0.0117647	0.00392157
3	2	0.0117647	0.00784314
2	1	0.00784314	0.00392157
1	0	0.00392157	0
1	0	0.00392157	0
0	0	0	0
0	0	0	0
1	0	0.00392157	0
1	1	0.00392157	0.00392157
1	1	0.00392157	0.00392157
1	1	0.00392157	0.00392157
1	0	0.00392157	0
1	0	0.00392157	0
1	1	0.00392157	0.00392157
1	1	0.00392157	0.00392157
2	1	0.00784314	0.00392157
1	0	0.00392157	0
1	0	0.00392157	0
1	1	0.00392157	0.00392157
3	1	0.0117647	0.00392157
1	0	0.00392157	0
1	0	0.00392157	0
3	1	0.0117647	0.00392157
3	1	0.0117647	0.00392157
2	0	0.00784314	0
1	0	0.00392157	0
2	1	0.00784314	0.00392157
1	0	0.00392157	0
1	0	0.00392157	0
2	0	0.00784314	0
2	0	0.00784314	0
0	0	0	0
0	0	0	0
3	1	0.0117647	0.00392157
3	1	0.0117647	0.00392157
3	0	0.0117647	0
4	1	0.0156863	0.00392157
4	1	0.0156863	0.00392157
5	1	0.0196078	0.00392157
6	0	0.0235294	0
5	0	0.0196078	0
3	0	0.0117647	0
1	1	0.00392157	0.00392157
2	1	0.00784314	0.00392157
1	1	0.00392157	0.00392157
3	1	0.0117647	0.00392157
3	1	0.0117647	0.00392157
1	1	0.00392157	0.00392157
1	0	0.00392157	0
1	0	0.00392157	0
4	0	0.0156863	0
2	1	0.00784314	0.00392157
2	1	0.00784314	0.00392157
2	1	0.00784314	0.00392157
4	1	0.0156863	0.00392157
5	0	0.0196078	0
4	0	0.0156863	0
2	0	0.00784314	0
1	0	0.00392157	0
2	1	0.00784314	0.00392157
3	0	0.0117647	0
4	0	0.0156863	0
3	0	0.0117647	0
0	0	0	0
1	0	0.00392157	0
1	0	0.00392157	0
1	1	0.00392157	0.00392157
1	0	0.00392157	0
1	0	0.00392157	0
5	0	0.0196078	0
4	1	0.0156863	0.00392157
2	1	0.00784314	0.00392157
2	0	0.00784314	0
1	0	0.00392157	0
2	1	0.00784314	0.00392157
2	1	0.00784314	0.00392157
1	1	0.00392157	0.00392157
3	0	0.0117647	0
7	0	0.027451	0
6	0	0.0235294	0
1	0	0.00392157	0
1	1	0.00392157	0.00392157
5	1	0.0196078	0.00392157
8	1	0.0313725	0.00392157
5	1	0.0196078	0.00392157
2	1	0.00784314	0.00392157
3	1	0.0117647	0.00392157
5	0	0.0196078	0
2	0	0.00784314	0
1	0	0.00392157	0
2	0	0.00784314	0
1	1	0.00392157	0.00392157
3	1	0.0117647	0.00392157
4	1	0.0156863	0.00392157
2	1	0.00784314	0.00392157
1	0	0.00392157	0
1	0	0.00392157	0
5	0	0.0196078	0
9	0	0.0352941	0
5	1	0.0196078	0.00392157
4	1	0.0156863	0.00392157
4	1	0.0156863	0.00392157
1	1	0.00392157	0.00392157
1	0	0.00392157	0
1	0	0.00392157	0
3	1	0.0117647	0.00392157
2	1	0.00784314	0.00392157
5	0	0.0196078	0
6	0	0.0235294	0
7	1	0.027451	0.00392157
7	1	0.027451	0.00392157
6	2	0.0235294	0.00784314
6	1	0.0235294	0.00392157
7	1	0.027451	0.00392157
8	1	0.0313725	0.00392157
6	1	0.0235294	0.00392157
5	1	0.0196078	0.00392157
7	1	0.027451	0.00392157
10	1	0.0392157	0.00392157
8	1	0.0313725	0.00392157
4	1	0.0156863	0.00392157
4	1	0.0156863	0.00392157
7	1	0.027451	0.00392157
12	4	0.0470588	0.0156863
14	1	0.054902	0.00392157
15	3	0.0588235	0.0117647
16	3	0.0627451	0.0117647
21	0	0.0823529	0
26	10	0.101961	0.0392157
25	15	0.0980392	0.0588235
20	4	0.0784314	0.0156863
12	5	0.0470588	0.0196078
10	3	0.0392157	0.0117647
5	2	0.0196078	0.00784314
4	4	0.0156863	0.0156863
10	3	0.0392157	0.0117647
14	0	0.054902	0
14	0	0.054902	0
14	0	0.054902	0
16	0	0.0627451	0
16	2	0.0627451	0.00784314
15	1	0.0588235	0.00392157
14	0	0.054902	0
13	3	0.0509804	0.0117647
15	3	0.0588235	0.0117647
20	5	0.0784314	0.0196078
25	13	0.0980392	0.0509804
17	14	0.0666667	0.054902
26	23	0.101961	0.0901961
40	27	0.156863	0.105882
57	30	0.223529	0.117647
69	33	0.270588	0.129412
75	43	0.294118	0.168627
84	38	0.329412	0.14902
93	52	0.364706	0.203922
110	70	0.431373	0.27451
127	77	0.498039	0.301961
145	94	0.568627	0.368627
156	127	0.611765	0.498039
160	156	0.627451	0.611765
170	143	0.666667	0.560784
162	124	0.635294	0.486275
156	111	0.611765	0.435294
150	103	0.588235	0.403922
146	93	0.572549	0.364706
148	79	0.580392	0.309804
121	68	0.47451	0.266667
98	61	0.384314	0.239216
79	58	0.309804	0.227451
69	59	0.270588	0.231373
61	60	0.239216	0.235294
59	53	0.231373	0.207843
57	50	0.223529	0.196078
51	38	0.2	0.14902
37	30	0.145098	0.117647
32	25	0.12549	0.0980392
34	20	0.133333	0.0784314
33	13	0.129412	0.0509804
29	8	0.113725	0.0313725
30	3	0.117647	0.0117647
31	1	0.121569	0.00392157
34	2	0.133333	0.00784314
37	1	0.145098	0.00392157
34	0	0.133333	0
22	0	0.0862745	0
16	1	0.0627451	0.00392157
20	1	0.0784314	0.00392157
20	1	0.0784314	0.00392157
18	1	0.0705882	0.00392157
14	1	0.054902	0.00392157
12	1	0.0470588	0.00392157
15	1	0.0588235	0.00392157
20	1	0.0784314	0.00392157
20	1	0.0784314	0.00392157
18	1	0.0705882	0.00392157
16	0	0.0627451	0
15	1	0.0588235	0.00392157
14	1	0.054902	0.00392157
13	0	0.0509804	0
9	0	0.0352941	0
8	0	0.0313725	0
14	0	0.054902	0
21	1	0.0823529	0.00392157
8	0	0.0313725	0
10	0	0.0392157	0
12	1	0.0470588	0.00392157
11	0	0.0431373	0
9	0	0.0352941	0
11	1	0.0431373	0.00392157
11	2	0.0431373	0.00784314
6	3	0.0235294	0.0117647
9	2	0.0352941	0.00784314
11	0	0.0431373	0
8	0	0.0313725	0
10	0	0.0392157	0
10	0	0.0392157	0
6	1	0.0235294	0.00392157
10	0	0.0392157	0
13	0	0.0509804	0
10	1	0.0392157	0.00392157
6	1	0.0235294	0.00392157
5	1	0.0196078	0.00392157
5	1	0.0196078	0.00392157
3	0	0.0117647	0
3	0	0.0117647	0
4	0	0.0156863	0
3	0	0.0117647	0
2	1	0.00784314	0.00392157
1	1	0.00392157	0.00392157
1	1	0.00392157	0.00392157
1	0	0.00392157	0
1	0	0.00392157	0
1	0	0.00392157	0
1	1	0.00392157	0.00392157
1	1	0.00392157	0.00392157
1	1	0.00392157	0.00392157
1	0	0.00392157	0
1	0	0.00392157	0
1	1	0.00392157	0.00392157
1	1	0.00392157	0.00392157
2	1	0.00784314	0.00392157
1	0	0.00392157	0
1	0	0.00392157	0
1	1	0.00392157	0.00392157
3	1	0.0117647	0.00392157
1	0	0.00392157	0
1	0	0.00392157	0
3	1	0.0117647	0.00392157
3	1	0.0117647	0.00392157
2	1	0.00784314	0.00392157
1	1	0.00392157	0.00392157
3	1	0.0117647	0.00392157
1	1	0.00392157	0.00392157
1	1	0.00392157	0.00392157
3	0	0.0117647	0
2	0	0.00784314	0
0	0	0	0
0	0	0	0
1	1	0.00392157	0.00392157
1	0	0.00392157	0
2	0	0.00784314	0
5	1	0.0196078	0.00392157
7	1	0.027451	0.00392157
4	1	0.0156863	0.00392157
2	0	0.00784314	0
2	0	0.00784314	0
2	0	0.00784314	0
1	1	0.00392157	0.00392157
2	0	0.00784314	0
1	1	0.00392157	0.00392157
3	1	0.0117647	0.00392157
4	1	0.0156863	0.00392157
2	1	0.00784314	0.00392157
1	0	0.00392157	0
0	0	0	0
2	0	0.00784314	0
1	0	0.00392157	0
2	0	0.00784314	0
2	1	0.00784314	0.00392157
4	1	0.0156863	0.00392157
6	2	0.0235294	0.00784314
5	2	0.0196078	0.00784314
3	0	0.0117647	0
1	0	0.00392157	0
4	1	0.0156863	0.00392157
3	0	0.0117647	0
2	0	0.00784314	0
1	0	0.00392157	0
1	0	0.00392157	0
1	0	0.00392157	0
1	1	0.00392157	0.00392157
1	1	0.00392157	0.00392157
1	0	0.00392157	0
2	0	0.00784314	0
5	0	0.0196078	0
5	1	0.0196078	0.00392157
2	1	0.00784314	0.00392157
2	1	0.00784314	0.00392157
4	1	0.0156863	0.00392157
7	1	0.027451	0.00392157
7	1	0.027451	0.00392157
3	1	0.0117647	0.00392157
4	0	0.0156863	0
7	0	0.027451	0
6	0	0.0235294	0
1	0	0.00392157	0
1	0	0.00392157	0
4	1	0.0156863	0.00392157
4	1	0.0156863	0.00392157
2	1	0.00784314	0.00392157
1	0	0.00392157	0
1	1	0.00392157	0.00392157
4	0	0.0156863	0
2	0	0.00784314	0
1	0	0.00392157	0
2	1	0.00784314	0.00392157
3	1	0.0117647	0.00392157
4	1	0.0156863	0.00392157
3	1	0.0117647	0.00392157
1	1	0.00392157	0.00392157
1	0	0.00392157	0
1	0	0.00392157	0
3	0	0.0117647	0
6	0	0.0235294	0
2	1	0.00784314	0.00392157
1	1	0.00392157	0.00392157
2	1	0.00784314	0.00392157
1	1	0.00392157	0.00392157
1	0	0.00392157	0
1	1	0.00392157	0.00392157
4	1	0.0156863	0.00392157
3	1	0.0117647	0.00392157
2	0	0.00784314	0
4	0	0.0156863	0
6	1	0.0235294	0.00392157
6	1	0.0235294	0.00392157
4	2	0.0156863	0.00784314
3	1	0.0117647	0.00392157
3	1	0.0117647	0.00392157
5	1	0.0196078	0.00392157
4	1	0.0156863	0.00392157
5	1	0.0196078	0.00392157
9	1	0.0352941	0.00392157
11	1	0.0431373	0.00392157
9	1	0.0352941	0.00392157
5	1	0.0196078	0.00392157
7	1	0.027451	0.00392157
11	1	0.0431373	0.00392157
5	5	0.0196078	0.0196078
7	3	0.027451	0.0117647
9	2	0.0352941	0.00784314
10	2	0.0392157	0.00784314
14	6	0.054902	0.0235294
17	5	0.0666667	0.0196078
16	3	0.0627451	0.0117647
12	11	0.0470588	0.0431373
5	4	0.0196078	0.0156863
8	1	0.0313725	0.00392157
7	0	0.027451	0
7	1	0.027451	0.00392157
8	1	0.0313725	0.00392157
8	0	0.0313725	0
9	0	0.0352941	0
11	0	0.0431373	0
10	0	0.0392157	0
10	1	0.0392157	0.00392157
12	1	0.0470588	0.00392157
13	1	0.0509804	0.00392157
13	2	0.0509804	0.00784314
14	1	0.054902	0.00392157
19	1	0.0745098	0.00392157
24	6	0.0941176	0.0235294
19	6	0.0745098	0.0235294
30	9	0.117647	0.0352941
30	20	0.117647	0.0784314
35	31	0.137255	0.121569
44	31	0.172549	0.121569
51	35	0.2	0.137255
63	23	0.247059	0.0901961
76	31	0.298039	0.121569
91	57	0.356863	0.223529
109	61	0.427451	0.239216
120	67	0.470588	0.262745
119	89	0.466667	0.34902
119	119	0.466667	0.466667
134	122	0.52549	0.478431
143	122	0.560784	0.478431
159	120	0.623529	0.470588
167	120	0.654902	0.470588
170	107	0.666667	0.419608
176	93	0.690196	0.364706
154	85	0.603922	0.333333
135	81	0.529412	0.317647
107	80	0.419608	0.313725
89	78	0.34902	0.305882
83	75	0.32549	0.294118
87	72	0.341176	0.282353
83	64	0.32549	0.25098
66	50	0.258824	0.196078
45	34	0.176471	0.133333
37	23	0.145098	0.0901961
35	16	0.137255	0.0627451
30	10	0.117647	0.0392157
26	6	0.101961	0.0235294
33	3	0.129412	0.0117647
30	1	0.117647	0.00392157
27	2	0.105882	0.00784314
25	1	0.0980392	0.00392157
21	0	0.0823529	0
13	0	0.0509804	0
10	2	0.0392157	0.00784314
15	1	0.0588235	0.00392157
16	1	0.0627451	0.00392157
15	1	0.0588235	0.00392157
14	1	0.054902	0.00392157
15	2	0.0588235	0.00784314
17	2	0.0666667	0.00784314
19	1	0.0745098	0.00392157
21	1	0.0823529	0.00392157
21	1	0.0823529	0.00392157
18	0	0.0705882	0
14	0	0.054902	0
12	0	0.0470588	0
13	0	0.0509804	0
14	0	0.054902	0
12	0	0.0470588	0
11	0	0.0431373	0
11	0	0.0431373	0
12	0	0.0470588	0
15	0	0.0588235	0
13	1	0.0509804	0.00392157
5	1	0.0196078	0.00392157
1	0	0.00392157	0
8	0	0.0313725	0
12	1	0.0470588	0.00392157
9	1	0.0352941	0.00392157
5	1	0.0196078	0.00392157
10	0	0.0392157	0
7	0	0.027451	0
10	0	0.0392157	0
10	1	0.0392157	0.00392157
6	1	0.0235294	0.00392157
11	0	0.0431373	0
13	0	0.0509804	0
11	1	0.0431373	0.00392157
7	2	0.027451	0.00784314
6	1	0.0235294	0.00392157
6	1	0.0235294	0.00392157
4	0	0.0156863	0
3	0	0.0117647	0
3	0	0.0117647	0
3	0	0.0117647	0
2	2	0.00784314	0.00784314
2	1	0.00784314	0.00392157
2	1	0.00784314	0.00392157
2	0	0.00784314	0
2	0	0.00784314	0
1	0	0.00392157	0
1	1	0.00392157	0.00392157
1	0	0.00392157	0
1	1	0.00392157	0.00392157
1	0	0.00392157	0
1	0	0.00392157	0
1	1	0.00392157	0.00392157
1	1	0.00392157	0.00392157
2	1	0.00784314	0.00392157
1	0	0.00392157	0
1	0	0.00392157	0
1	1	0.00392157	0.00392157
2	1	0.00784314	0.00392157
0	0	0	0
1	0	0.00392157	0
4	1	0.0156863	0.00392157
4	1	0.0156863	0.00392157
2	2	0.00784314	0.00784314
2	1	0.00784314	0.00392157
4	1	0.0156863	0.00392157
1	1	0.00392157	0.00392157
2	1	0.00784314	0.00392157
3	0	0.0117647	0
2	0	0.00784314	0
0	0	0	0
1	0	0.00392157	0
1	1	0.00392157	0.00392157
1	0	0.00392157	0
0	0	0	0
5	1	0.0196078	0.00392157
7	1	0.027451	0.00392157
3	1	0.0117647	0.00392157
0	0	0	0
1	0	0.00392157	0
1	0	0.00392157	0
1	0	0.00392157	0
1	0	0.00392157	0
1	1	0.00392157	0.00392157
3	1	0.0117647	0.00392157
4	1	0.0156863	0.00392157
2	1	0.00784314	0.00392157
0	0	0	0
0	0	0	0
1	0	0.00392157	0
5	0	0.0196078	0
4	1	0.0156863	0.00392157
2	0	0.00784314	0
2	2	0.00784314	0.00784314
8	3	0.0313725	0.0117647
8	5	0.0313725	0.0196078
7	5	0.027451	0.0196078
7	4	0.027451	0.0156863
6	1	0.0235294	0.00392157
2	0	0.00784314	0
0	0	0	0
0	0	0	0
2	0	0.00784314	0
5	1	0.0196078	0.00392157
5	1	0.0196078	0.00392157
4	1	0.0156863	0.00392157
3	1	0.0117647	0.00392157
4	0	0.0156863	0
4	0	0.0156863	0
4	1	0.0156863	0.00392157
4	1	0.0156863	0.00392157
6	2	0.0235294	0.00784314
11	1	0.0431373	0.00392157
14	1	0.054902	0.00392157
9	1	0.0352941	0.00392157
4	1	0.0156863	0.00392157
0	0	0	0
2	0	0.00784314	0
3	0	0.0117647	0
1	0	0.00392157	0
1	0	0.00392157	0
1	1	0.00392157	0.00392157
2	1	0.00784314	0.00392157
1	0	0.00392157	0
1	0	0.00392157	0
1	1	0.00392157	0.00392157
4	0	0.0156863	0
2	0	0.00784314	0
1	0	0.00392157	0
2	1	0.00784314	0.00392157
2	1	0.00784314	0.00392157
2	1	0.00784314	0.00392157
1	1	0.00392157	0.00392157
1	0	0.00392157	0
1	0	0.00392157	0
1	0	0.00392157	0
1	0	0.00392157	0
2	0	0.00784314	0
1	0	0.00392157	0
1	0	0.00392157	0
1	1	0.00392157	0.00392157
1	1	0.00392157	0.00392157
1	0	0.00392157	0
2	1	0.00784314	0.00392157
3	1	0.0117647	0.00392157
2	1	0.00784314	0.00392157
0	0	0	0
3	0	0.0117647	0
5	1	0.0196078	0.00392157
5	1	0.0196078	0.00392157
2	2	0.00784314	0.00784314
1	0	0.00392157	0
1	0	0.00392157	0
2	1	0.00784314	0.00392157
1	1	0.00392157	0.00392157
4	1	0.0156863	0.00392157
7	1	0.027451	0.00392157
9	1	0.0352941	0.00392157
6	1	0.0235294	0.00392157
3	1	0.0117647	0.00392157
5	1	0.0196078	0.00392157
10	1	0.0392157	0.00392157
5	0	0.0196078	0
4	2	0.0156863	0.00784314
6	2	0.0235294	0.00784314
3	3	0.0117647	0.0117647
5	4	0.0196078	0.0156863
7	4	0.027451	0.0156863
4	0	0.0156863	0
12	0	0.0470588	0
8	3	0.0313725	0.0117647
9	1	0.0352941	0.00392157
7	1	0.027451	0.00392157
5	2	0.0196078	0.00784314
5	3	0.0196078	0.0117647
4	2	0.0156863	0.00784314
4	1	0.0156863	0.00392157
7	1	0.027451	0.00392157
7	0	0.027451	0
8	1	0.0313725	0.00392157
10	1	0.0392157	0.00392157
11	1	0.0431373	0.00392157
11	1	0.0431373	0.00392157
12	0	0.0470588	0
15	0	0.0588235	0
19	2	0.0745098	0.00784314
18	2	0.0705882	0.00784314
26	1	0.101961	0.00392157
23	6	0.0901961	0.0235294
20	18	0.0784314	0.0705882
27	20	0.105882	0.0784314
35	28	0.137255	0.109804
46	20	0.180392	0.0784314
57	30	0.223529	0.117647
68	39	0.266667	0.152941
81	43	0.317647	0.168627
89	46	0.34902	0.180392
88	58	0.345098	0.227451
89	77	0.34902	0.301961
95	89	0.372549	0.34902
109	105	0.427451	0.411765
137	115	0.537255	0.45098
156	125	0.611765	0.490196
163	114	0.639216	0.447059
173	106	0.678431	0.415686
160	106	0.627451	0.415686
151	108	0.592157	0.423529
125	106	0.490196	0.415686
107	96	0.419608	0.376471
106	82	0.415686	0.321569
125	84	0.490196	0.329412
114	81	0.447059	0.317647
92	68	0.360784	0.266667
72	47	0.282353	0.184314
62	28	0.243137	0.109804
52	17	0.203922	0.0666667
42	11	0.164706	0.0431373
41	7	0.160784	0.027451
40	3	0.156863	0.0117647
32	1	0.12549	0.00392157
22	1	0.0862745	0.00392157
17	0	0.0666667	0
16	0	0.0627451	0
14	0	0.054902	0
13	1	0.0509804	0.00392157
17	0	0.0666667	0
14	0	0.054902	0
16	1	0.0627451	0.00392157
19	1	0.0745098	0.00392157
19	2	0.0745098	0.00784314
18	2	0.0705882	0.00784314
16	1	0.0627451	0.00392157
18	1	0.0705882	0.00392157
20	0	0.0784314	0
15	0	0.0588235	0
10	0	0.0392157	0
8	0	0.0313725	0
11	0	0.0431373	0
12	0	0.0470588	0
11	0	0.0431373	0
9	0	0.0352941	0
10	0	0.0392157	0
13	0	0.0509804	0
17	0	0.0666667	0
15	1	0.0588235	0.00392157
4	1	0.0156863	0.00392157
0	0	0	0
8	0	0.0313725	0
13	0	0.0509804	0
8	0	0.0313725	0
2	1	0.00784314	0.00392157
8	0	0.0313725	0
5	1	0.0196078	0.00392157
7	2	0.027451	0.00784314
8	3	0.0313725	0.0117647
4	2	0.0156863	0.00784314
8	1	0.0313725	0.00392157
11	0	0.0431373	0
9	1	0.0352941	0.00392157
5	1	0.0196078	0.00392157
4	1	0.0156863	0.00392157
5	1	0.0196078	0.00392157
3	0	0.0117647	0
2	1	0.00784314	0.00392157
3	2	0.0117647	0.00784314
2	2	0.00784314	0.00784314
2	2	0.00784314	0.00784314
2	1	0.00784314	0.00392157
2	1	0.00784314	0.00392157
2	0	0.00784314	0
2	0	0.00784314	0
1	0	0.00392157	0
1	1	0.00392157	0.00392157
1	0	0.00392157	0
1	1	0.00392157	0.00392157
1	0	0.00392157	0
1	0	0.00392157	0
1	1	0.00392157	0.00392157
1	1	0.00392157	0.00392157
2	1	0.00784314	0.00392157
1	0	0.00392157	0
1	0	0.00392157	0
1	1	0.00392157	0.00392157
1	1	0.00392157	0.00392157
0	0	0	0
1	0	0.00392157	0
4	1	0.0156863	0.00392157
4	1	0.0156863	0.00392157
2	2	0.00784314	0.00784314
2	1	0.00784314	0.00392157
4	1	0.0156863	0.00392157
1	0	0.00392157	0
1	0	0.00392157	0
2	0	0.00784314	0
2	0	0.00784314	0
1	0	0.00392157	0
4	0	0.0156863	0
4	1	0.0156863	0.00392157
1	1	0.00392157	0.00392157
0	0	0	0
4	1	0.0156863	0.00392157
6	1	0.0235294	0.00392157
3	1	0.0117647	0.00392157
0	0	0	0
0	0	0	0
0	0	0	0
1	0	0.00392157	0
1	0	0.00392157	0
2	1	0.00784314	0.00392157
3	2	0.0117647	0.00784314
4	1	0.0156863	0.00392157
2	1	0.00784314	0.00392157
0	0	0	0
0	0	0	0
1	1	0.00392157	0.00392157
11	1	0.0431373	0.00392157
9	3	0.0352941	0.0117647
4	2	0.0156863	0.00784314
5	0	0.0196078	0
13	0	0.0509804	0
13	5	0.0509804	0.0196078
11	9	0.0431373	0.0352941
14	8	0.054902	0.0313725
9	1	0.0352941	0.00392157
4	0	0.0156863	0
0	0	0	0
0	0	0	0
4	0	0.0156863	0
8	1	0.0313725	0.00392157
8	1	0.0313725	0.00392157
6	1	0.0235294	0.00392157
3	1	0.0117647	0.00392157
1	0	0.00392157	0
0	0	0	0
1	0	0.00392157	0
1	0	0.00392157	0
4	2	0.0156863	0.00784314
8	1	0.0313725	0.00392157
11	1	0.0431373	0.00392157
10	1	0.0392157	0.00392157
6	1	0.0235294	0.00392157
1	0	0.00392157	0
1	0	0.00392157	0
4	0	0.0156863	0
6	0	0.0235294	0
7	1	0.027451	0.00392157
6	1	0.0235294	0.00392157
3	1	0.0117647	0.00392157
3	1	0.0117647	0.00392157
3	1	0.0117647	0.00392157
6	1	0.0235294	0.00392157
7	0	0.027451	0
3	0	0.0117647	0
1	0	0.00392157	0
2	2	0.00784314	0.00784314
1	1	0.00392157	0.00392157
1	0	0.00392157	0
1	0	0.00392157	0
1	0	0.00392157	0
1	1	0.00392157	0.00392157
2	1	0.00784314	0.00392157
1	0	0.00392157	0
1	0	0.00392157	0
1	0	0.00392157	0
1	0	0.00392157	0
2	1	0.00784314	0.00392157
2	1	0.00784314	0.00392157
1	1	0.00392157	0.00392157
2	1	0.00784314	0.00392157
3	1	0.0117647	0.00392157
1	1	0.00392157	0.00392157
0	0	0	0
4	0	0.0156863	0
7	1	0.027451	0.00392157
6	1	0.0235294	0.00392157
3	2	0.0117647	0.00784314
1	1	0.00392157	0.00392157
2	1	0.00784314	0.00392157
3	1	0.0117647	0.00392157
2	1	0.00784314	0.00392157
3	1	0.0117647	0.00392157
5	1	0.0196078	0.00392157
5	1	0.0196078	0.00392157
2	1	0.00784314	0.00392157
1	0	0.00392157	0
1	1	0.00392157	0.00392157
4	1	0.0156863	0.00392157
7	4	0.027451	0.0156863
7	2	0.027451	0.00784314
15	7	0.0588235	0.027451
6	6	0.0235294	0.0235294
7	0	0.027451	0
8	6	0.0313725	0.0235294
7	5	0.027451	0.0196078
6	2	0.0235294	0.00784314
16	2	0.0627451	0.00784314
11	2	0.0431373	0.00784314
4	2	0.0156863	0.00784314
2	2	0.00784314	0.00784314
5	2	0.0196078	0.00784314
6	2	0.0235294	0.00784314
5	1	0.0196078	0.00392157
5	1	0.0196078	0.00392157
9	2	0.0352941	0.00784314
9	1	0.0352941	0.00392157
11	1	0.0431373	0.00392157
12	1	0.0470588	0.00392157
11	1	0.0431373	0.00392157
9	0	0.0352941	0
10	0	0.0392157	0
12	0	0.0470588	0
10	1	0.0392157	0.00392157
20	0	0.0784314	0
17	3	0.0666667	0.0117647
14	12	0.054902	0.0470588
20	17	0.0784314	0.0666667
27	25	0.105882	0.0980392
32	19	0.12549	0.0745098
39	27	0.152941	0.105882
45	24	0.176471	0.0941176
50	29	0.196078	0.113725
61	35	0.239216	0.137255
72	42	0.282353	0.164706
74	47	0.290196	0.184314
72	50	0.282353	0.196078
82	66	0.321569	0.258824
100	90	0.392157	0.352941
113	111	0.443137	0.435294
119	109	0.466667	0.427451
137	113	0.537255	0.443137
135	121	0.529412	0.47451
139	127	0.545098	0.498039
128	126	0.501961	0.494118
123	114	0.482353	0.447059
133	92	0.521569	0.360784
157	102	0.615686	0.4
148	100	0.580392	0.392157
128	88	0.501961	0.345098
110	64	0.431373	0.25098
96	42	0.376471	0.164706
75	29	0.294118	0.113725
59	21	0.231373	0.0823529
60	15	0.235294	0.0588235
53	5	0.207843	0.0196078
41	2	0.160784	0.00784314
26	1	0.101961	0.00392157
20	1	0.0784314	0.00392157
22	0	0.0862745	0
22	0	0.0862745	0
19	1	0.0745098	0.00392157
20	0	0.0784314	0
18	0	0.0705882	0
20	1	0.0784314	0.00392157
22	1	0.0862745	0.00392157
22	2	0.0862745	0.00784314
17	2	0.0666667	0.00784314
12	1	0.0470588	0.00392157
13	1	0.0509804	0.00392157
17	0	0.0666667	0
9	0	0.0352941	0
7	0	0.027451	0
6	0	0.0235294	0
5	1	0.0196078	0.00392157
4	1	0.0156863	0.00392157
5	1	0.0196078	0.00392157
10	0	0.0392157	0
16	0	0.0627451	0
7	0	0.027451	0
14	0	0.054902	0
15	1	0.0588235	0.00392157
7	1	0.027451	0.00392157
2	0	0.00784314	0
9	0	0.0352941	0
11	0	0.0431373	0
3	1	0.0117647	0.00392157
1	0	0.00392157	0
5	0	0.0196078	0
1	1	0.00392157	0.00392157
2	2	0.00784314	0.00784314
3	2	0.0117647	0.00784314
2	0	0.00784314	0
4	0	0.0156863	0
5	0	0.0196078	0
3	1	0.0117647	0.00392157
1	0	0.00392157	0
1	0	0.00392157	0
2	1	0.00784314	0.00392157
1	0	0.00392157	0
1	1	0.00392157	0.00392157
3	2	0.0117647	0.00784314
4	2	0.0156863	0.00784314
2	1	0.00784314	0.00392157
1	1	0.00392157	0.00392157
1	1	0.00392157	0.00392157
1	0	0.00392157	0
1	0	0.00392157	0
1	0	0.00392157	0
1	1	0.00392157	0.00392157
1	1	0.00392157	0.00392157
1	1	0.00392157	0.00392157
1	0	0.00392157	0
1	0	0.00392157	0
1	1	0.00392157	0.00392157
1	1	0.00392157	0.00392157
2	1	0.00784314	0.00392157
1	0	0.00392157	0
1	0	0.00392157	0
1	1	0.00392157	0.00392157
1	1	0.00392157	0.00392157
0	0	0	0
0	0	0	0
3	1	0.0117647	0.00392157
3	1	0.0117647	0.00392157
2	1	0.00784314	0.00392157
1	0	0.00392157	0
1	1	0.00392157	0.00392157
1	0	0.00392157	0
1	0	0.00392157	0
1	0	0.00392157	0
1	0	0.00392157	0
2	0	0.00784314	0
5	0	0.0196078	0
6	1	0.0235294	0.00392157
2	1	0.00784314	0.00392157
0	0	0	0
1	1	0.00392157	0.00392157
3	1	0.0117647	0.00392157
3	1	0.0117647	0.00392157
1	0	0.00392157	0
0	0	0	0
0	0	0	0
1	0	0.00392157	0
1	0	0.00392157	0
2	1	0.00784314	0.00392157
3	2	0.0117647	0.00784314
4	1	0.0156863	0.00392157
2	0	0.00784314	0
0	0	0	0
0	0	0	0
1	1	0.00392157	0.00392157
9	7	0.0352941	0.027451
11	9	0.0431373	0.0352941
10	6	0.0392157	0.0235294
11	2	0.0431373	0.00784314
16	0	0.0627451	0
12	4	0.0470588	0.0156863
10	6	0.0392157	0.0235294
13	6	0.0509804	0.0235294
13	1	0.0509804	0.00392157
8	0	0.0313725	0
3	0	0.0117647	0
3	0	0.0117647	0
6	0	0.0235294	0
8	1	0.0313725	0.00392157
7	1	0.027451	0.00392157
5	1	0.0196078	0.00392157
3	1	0.0117647	0.00392157
2	0	0.00784314	0
0	0	0	0
1	0	0.00392157	0
1	0	0.00392157	0
2	0	0.00784314	0
1	1	0.00392157	0.00392157
3	1	0.0117647	0.00392157
8	1	0.0313725	0.00392157
8	1	0.0313725	0.00392157
4	0	0.0156863	0
2	0	0.00784314	0
4	0	0.0156863	0
10	0	0.0392157	0
12	1	0.0470588	0.00392157
10	1	0.0392157	0.00392157
4	1	0.0156863	0.00392157
6	1	0.0235294	0.00392157
8	1	0.0313725	0.00392157
10	1	0.0392157	0.00392157
10	0	0.0392157	0
4	0	0.0156863	0
1	1	0.00392157	0.00392157
3	2	0.0117647	0.00784314
2	1	0.00784314	0.00392157
2	1	0.00784314	0.00392157
1	1	0.00392157	0.00392157
1	1	0.00392157	0.00392157
1	1	0.00392157	0.00392157
1	1	0.00392157	0.00392157
1	0	0.00392157	0
2	0	0.00784314	0
1	1	0.00392157	0.00392157
1	1	0.00392157	0.00392157
3	1	0.0117647	0.00392157
3	1	0.0117647	0.00392157
1	1	0.00392157	0.00392157
4	1	0.0156863	0.00392157
6	1	0.0235294	0.00392157
4	1	0.0156863	0.00392157
2	0	0.00784314	0
4	0	0.0156863	0
7	1	0.027451	0.00392157
8	1	0.0313725	0.00392157
6	2	0.0235294	0.00784314
4	1	0.0156863	0.00392157
5	1	0.0196078	0.00392157
6	1	0.0235294	0.00392157
4	1	0.0156863	0.00392157
3	1	0.0117647	0.00392157
4	1	0.0156863	0.00392157
3	1	0.0117647	0.00392157
2	1	0.00784314	0.00392157
1	0	0.00392157	0
1	1	0.00392157	0.00392157
3	1	0.0117647	0.00392157
5	1	0.0196078	0.00392157
5	0	0.0196078	0
18	4	0.0705882	0.0156863
8	3	0.0313725	0.0117647
3	0	0.0117647	0
7	4	0.027451	0.0156863
7	3	0.027451	0.0117647
7	1	0.027451	0.00392157
14	2	0.054902	0.00784314
9	2	0.0352941	0.00784314
4	2	0.0156863	0.00784314
4	1	0.0156863	0.00392157
8	1	0.0313725	0.00392157
9	0	0.0352941	0
7	0	0.027451	0
8	0	0.0313725	0
10	2	0.0392157	0.00784314
10	0	0.0392157	0
11	1	0.0431373	0.00392157
13	3	0.0509804	0.0117647
13	2	0.0509804	0.00784314
11	1	0.0431373	0.00392157
10	1	0.0392157	0.00392157
10	0	0.0392157	0
6	2	0.0235294	0.00784314
18	1	0.0705882	0.00392157
18	3	0.0705882	0.0117647
16	8	0.0627451	0.0313725
19	13	0.0745098	0.0509804
27	17	0.105882	0.0666667
21	15	0.0823529	0.0588235
24	20	0.0941176	0.0784314
26	18	0.101961	0.0705882
31	21	0.121569	0.0823529
38	30	0.14902	0.117647
46	38	0.180392	0.14902
50	37	0.196078	0.145098
53	37	0.207843	0.145098
64	49	0.25098	0.192157
78	63	0.305882	0.247059
87	70	0.341176	0.27451
91	76	0.356863	0.298039
103	97	0.403922	0.380392
114	102	0.447059	0.4
124	112	0.486275	0.439216
134	112	0.52549	0.439216
129	127	0.505882	0.498039
147	111	0.576471	0.435294
173	112	0.678431	0.439216
173	108	0.678431	0.423529
162	93	0.635294	0.364706
145	69	0.568627	0.270588
124	51	0.486275	0.2
94	43	0.368627	0.168627
73	32	0.286275	0.12549
72	21	0.282353	0.0823529
73	12	0.286275	0.0470588
58	8	0.227451	0.0313725
39	6	0.152941	0.0235294
28	4	0.109804	0.0156863
28	2	0.109804	0.00784314
26	2	0.101961	0.00784314
21	2	0.0823529	0.00784314
19	0	0.0745098	0
21	0	0.0823529	0
21	1	0.0823529	0.00392157
21	1	0.0823529	0.00392157
21	1	0.0823529	0.00392157
16	1	0.0627451	0.00392157
10	1	0.0392157	0.00392157
11	1	0.0431373	0.00392157
15	0	0.0588235	0
9	1	0.0352941	0.00392157
6	0	0.0235294	0
4	0	0.0156863	0
4	1	0.0156863	0.00392157
2	2	0.00784314	0.00784314
3	1	0.0117647	0.00392157
9	1	0.0352941	0.00392157
17	0	0.0666667	0
2	0	0.00784314	0
10	0	0.0392157	0
13	1	0.0509804	0.00392157
7	1	0.027451	0.00392157
3	0	0.0117647	0
8	0	0.0313725	0
8	1	0.0313725	0.00392157
2	0	0.00784314	0
4	0	0.0156863	0
7	0	0.027451	0
1	0	0.00392157	0
1	0	0.00392157	0
1	0	0.00392157	0
1	0	0.00392157	0
2	0	0.00784314	0
2	0	0.00784314	0
1	1	0.00392157	0.00392157
1	0	0.00392157	0
1	0	0.00392157	0
1	0	0.00392157	0
0	0	0	0
0	0	0	0
2	2	0.00784314	0.00784314
3	1	0.0117647	0.00392157
2	1	0.00784314	0.00392157
1	0	0.00392157	0
1	0	0.00392157	0
0	0	0	0
0	0	0	0
1	0	0.00392157	0
1	1	0.00392157	0.00392157
1	1	0.00392157	0.00392157
1	1	0.00392157	0.00392157
1	0	0.00392157	0
1	0	0.00392157	0
1	1	0.00392157	0.00392157
1	1	0.00392157	0.00392157
2	1	0.00784314	0.00392157
1	0	0.00392157	0
1	0	0.00392157	0
1	1	0.00392157	0.00392157
1	1	0.00392157	0.00392157
0	0	0	0
0	0	0	0
3	1	0.0117647	0.00392157
2	1	0.00784314	0.00392157
2	0	0.00784314	0
1	0	0.00392157	0
1	0	0.00392157	0
1	1	0.00392157	0.00392157
1	1	0.00392157	0.00392157
2	0	0.00784314	0
1	0	0.00392157	0
2	0	0.00784314	0
5	0	0.0196078	0
6	1	0.0235294	0.00392157
2	1	0.00784314	0.00392157
0	0	0	0
1	0	0.00392157	0
1	1	0.00392157	0.00392157
3	1	0.0117647	0.00392157
2	0	0.00784314	0
0	0	0	0
0	0	0	0
1	0	0.00392157	0
1	0	0.00392157	0
2	1	0.00784314	0.00392157
3	2	0.0117647	0.00784314
4	1	0.0156863	0.00392157
2	0	0.00784314	0
0	0	0	0
0	0	0	0
2	1	0.00784314	0.00392157
14	3	0.054902	0.0117647
20	6	0.0784314	0.0235294
19	8	0.0745098	0.0313725
16	5	0.0627451	0.0196078
16	3	0.0627451	0.0117647
8	4	0.0313725	0.0156863
6	0	0.0235294	0
8	2	0.0313725	0.00784314
15	1	0.0588235	0.00392157
12	0	0.0470588	0
8	0	0.0313725	0
6	0	0.0235294	0
7	0	0.027451	0
6	1	0.0235294	0.00392157
4	1	0.0156863	0.00392157
2	1	0.00784314	0.00392157
9	1	0.0352941	0.00392157
9	0	0.0352941	0
9	0	0.0352941	0
7	1	0.027451	0.00392157
4	1	0.0156863	0.00392157
2	2	0.00784314	0.00784314
1	1	0.00392157	0.00392157
1	0	0.00392157	0
2	1	0.00784314	0.00392157
5	1	0.0196078	0.00392157
3	0	0.0117647	0
0	0	0	0
0	0	0	0
6	0	0.0235294	0
9	1	0.0352941	0.00392157
7	1	0.027451	0.00392157
3	1	0.0117647	0.00392157
6	1	0.0235294	0.00392157
10	1	0.0392157	0.00392157
12	1	0.0470588	0.00392157
11	0	0.0431373	0
5	0	0.0196078	0
2	1	0.00784314	0.00392157
5	2	0.0196078	0.00784314
5	1	0.0196078	0.00392157
6	1	0.0235294	0.00392157
5	1	0.0196078	0.00392157
3	1	0.0117647	0.00392157
1	0	0.00392157	0
1	0	0.00392157	0
1	0	0.00392157	0
3	0	0.0117647	0
1	1	0.00392157	0.00392157
1	1	0.00392157	0.00392157
3	1	0.0117647	0.00392157
3	1	0.0117647	0.00392157
2	1	0.00784314	0.00392157
6	1	0.0235294	0.00392157
10	1	0.0392157	0.00392157
10	1	0.0392157	0.00392157
1	0	0.00392157	0
4	0	0.0156863	0
7	1	0.027451	0.00392157
8	1	0.0313725	0.00392157
7	2	0.027451	0.00784314
7	1	0.027451	0.00392157
7	1	0.027451	0.00392157
9	1	0.0352941	0.00392157
6	1	0.0235294	0.00392157
4	1	0.0156863	0.00392157
4	1	0.0156863	0.00392157
4	1	0.0156863	0.00392157
4	1	0.0156863	0.00392157
4	1	0.0156863	0.00392157
5	1	0.0196078	0.00392157
6	1	0.0235294	0.00392157
1	0	0.00392157	0
1	0	0.00392157	0
15	0	0.0588235	0
8	0	0.0313725	0
5	0	0.0196078	0
5	1	0.0196078	0.00392157
1	0	0.00392157	0
16	0	0.0627451	0
2	1	0.00784314	0.00392157
5	2	0.0196078	0.00784314
6	2	0.0235294	0.00784314
9	0	0.0352941	0
11	0	0.0431373	0
9	0	0.0352941	0
8	1	0.0313725	0.00392157
12	2	0.0470588	0.00784314
8	0	0.0313725	0
8	0	0.0313725	0
10	0	0.0392157	0
13	2	0.0509804	0.00784314
15	2	0.0588235	0.00784314
15	1	0.0588235	0.00392157
14	0	0.054902	0
13	0	0.0509804	0
11	1	0.0431373	0.00392157
21	1	0.0823529	0.00392157
17	1	0.0666667	0.00392157
13	1	0.0509804	0.00392157
14	3	0.054902	0.0117647
24	7	0.0941176	0.027451
13	11	0.0509804	0.0431373
18	14	0.0705882	0.054902
21	16	0.0823529	0.0627451
26	19	0.101961	0.0745098
25	24	0.0980392	0.0941176
31	16	0.121569	0.0627451
28	21	0.109804	0.0823529
39	29	0.152941	0.113725
55	37	0.215686	0.145098
62	44	0.243137	0.172549
64	51	0.25098	0.2
73	53	0.286275	0.207843
87	72	0.341176	0.282353
97	74	0.380392	0.290196
109	80	0.427451	0.313725
129	84	0.505882	0.329412
137	108	0.537255	0.423529
134	127	0.52549	0.498039
166	122	0.65098	0.478431
180	114	0.705882	0.447059
181	95	0.709804	0.372549
170	73	0.666667	0.286275
153	62	0.6	0.243137
127	58	0.498039	0.227451
107	46	0.419608	0.180392
108	32	0.423529	0.12549
101	19	0.396078	0.0745098
84	15	0.329412	0.0588235
60	12	0.235294	0.0470588
44	9	0.172549	0.0352941
40	6	0.156863	0.0235294
36	5	0.141176	0.0196078
31	5	0.121569	0.0196078
27	2	0.105882	0.00784314
22	1	0.0862745	0.00392157
19	1	0.0745098	0.00392157
18	1	0.0705882	0.00392157
18	1	0.0705882	0.00392157
15	1	0.0588235	0.00392157
10	1	0.0392157	0.00392157
11	1	0.0431373	0.00392157
16	1	0.0627451	0.00392157
13	1	0.0509804	0.00392157
8	0	0.0313725	0
4	0	0.0156863	0
5	1	0.0196078	0.00392157
7	2	0.027451	0.00784314
7	2	0.027451	0.00784314
9	1	0.0352941	0.00392157
11	0	0.0431373	0
2	0	0.00784314	0
8	0	0.0313725	0
10	1	0.0392157	0.00392157
5	1	0.0196078	0.00392157
2	0	0.00784314	0
7	1	0.027451	0.00392157
8	2	0.0313725	0.00784314
2	1	0.00784314	0.00392157
8	2	0.0313725	0.00784314
10	1	0.0392157	0.00392157
3	1	0.0117647	0.00392157
1	1	0.00392157	0.00392157
1	1	0.00392157	0.00392157
1	0	0.00392157	0
3	2	0.0117647	0.00784314
3	1	0.0117647	0.00392157
3	1	0.0117647	0.00392157
1	0	0.00392157	0
0	0	0	0
1	0	0.00392157	0
0	0	0	0
0	0	0	0
1	1	0.00392157	0.00392157
2	0	0.00784314	0
2	0	0.00784314	0
1	0	0.00392157	0
1	0	0.00392157	0
0	0	0	0
0	0	0	0
0	0	0	0
1	1	0.00392157	0.00392157
2	1	0.00784314	0.00392157
1	1	0.00392157	0.00392157
1	0	0.00392157	0
1	0	0.00392157	0
1	1	0.00392157	0.00392157
1	1	0.00392157	0.00392157
2	1	0.00784314	0.00392157
1	0	0.00392157	0
1	0	0.00392157	0
1	1	0.00392157	0.00392157
1	1	0.00392157	0.00392157
1	0	0.00392157	0
1	0	0.00392157	0
1	1	0.00392157	0.00392157
1	0	0.00392157	0
2	0	0.00784314	0
1	0	0.00392157	0
1	0	0.00392157	0
1	1	0.00392157	0.00392157
1	1	0.00392157	0.00392157
1	0	0.00392157	0
1	0	0.00392157	0
1	0	0.00392157	0
1	0	0.00392157	0
1	1	0.00392157	0.00392157
1	1	0.00392157	0.00392157
0	0	0	0
1	1	0.00392157	0.00392157
1	1	0.00392157	0.00392157
1	0	0.00392157	0
0	0	0	0
1	0	0.00392157	0
0	0	0	0
1	0	0.00392157	0
1	1	0.00392157	0.00392157
1	1	0.00392157	0.00392157
4	1	0.0156863	0.00392157
7	0	0.027451	0
5	0	0.0196078	0
2	1	0.00784314	0.00392157
3	3	0.0117647	0.0117647
7	4	0.027451	0.0156863
10	1	0.0392157	0.00392157
15	1	0.0588235	0.00392157
12	4	0.0470588	0.0156863
9	7	0.0352941	0.027451
13	5	0.0509804	0.0196078
10	0	0.0392157	0
1	0	0.00392157	0
2	0	0.00784314	0
7	1	0.027451	0.00392157
6	0	0.0235294	0
9	0	0.0352941	0
13	1	0.0509804	0.00392157
10	1	0.0392157	0.00392157
3	1	0.0117647	0.00392157
1	0	0.00392157	0
3	2	0.0117647	0.00784314
17	1	0.0666667	0.00392157
16	0	0.0627451	0
6	0	0.0235294	0
4	1	0.0156863	0.00392157
5	1	0.0196078	0.00392157
2	2	0.00784314	0.00784314
3	1	0.0117647	0.00392157
1	1	0.00392157	0.00392157
2	1	0.00784314	0.00392157
1	0	0.00392157	0
0	0	0	0
1	0	0.00392157	0
1	0	0.00392157	0
0	0	0	0
1	1	0.00392157	0.00392157
4	1	0.0156863	0.00392157
4	1	0.0156863	0.00392157
1	1	0.00392157	0.00392157
2	1	0.00784314	0.00392157
9	1	0.0352941	0.00392157
12	0	0.0470588	0
4	0	0.0156863	0
1	0	0.00392157	0
5	2	0.0196078	0.00784314
9	1	0.0352941	0.00392157
8	1	0.0313725	0.00392157
6	1	0.0235294	0.00392157
3	1	0.0117647	0.00392157
1	0	0.00392157	0
1	0	0.00392157	0
0	0	0	0
0	0	0	0
1	0	0.00392157	0
1	0	0.00392157	0
1	0	0.00392157	0
1	0	0.00392157	0
1	0	0.00392157	0
1	1	0.00392157	0.00392157
7	1	0.027451	0.00392157
11	1	0.0431373	0.00392157
5	0	0.0196078	0
2	0	0.00784314	0
1	0	0.00392157	0
1	0	0.00392157	0
2	2	0.00784314	0.00784314
6	1	0.0235294	0.00392157
7	1	0.027451	0.00392157
8	1	0.0313725	0.00392157
4	1	0.0156863	0.00392157
3	0	0.0117647	0
4	0	0.0156863	0
5	1	0.0196078	0.00392157
5	1	0.0196078	0.00392157
6	2	0.0235294	0.00784314
7	1	0.027451	0.00392157
6	1	0.0235294	0.00392157
1	0	0.00392157	0
2	1	0.00784314	0.00392157
12	0	0.0470588	0
13	0	0.0509804	0
3	0	0.0117647	0
0	0	0	0
7	1	0.027451	0.00392157
13	1	0.0509804	0.00392157
13	1	0.0509804	0.00392157
10	1	0.0392157	0.00392157
11	1	0.0431373	0.00392157
12	1	0.0470588	0.00392157
9	0	0.0352941	0
8	0	0.0313725	0
9	1	0.0352941	0.00392157
9	2	0.0352941	0.00784314
5	1	0.0196078	0.00392157
3	1	0.0117647	0.00392157
3	1	0.0117647	0.00392157
9	1	0.0352941	0.00392157
15	1	0.0588235	0.00392157
14	1	0.054902	0.00392157
13	0	0.0509804	0
17	0	0.0666667	0
18	1	0.0705882	0.00392157
19	0	0.0745098	0
18	0	0.0705882	0
16	1	0.0627451	0.00392157
14	1	0.054902	0.00392157
15	2	0.0588235	0.00784314
17	3	0.0666667	0.0117647
16	4	0.0627451	0.0156863
27	9	0.105882	0.0352941
22	11	0.0862745	0.0431373
18	13	0.0705882	0.0509804
18	14	0.0705882	0.054902
24	16	0.0941176	0.0627451
30	24	0.117647	0.0941176
35	32	0.137255	0.12549
43	32	0.168627	0.12549
50	36	0.196078	0.141176
60	44	0.235294	0.172549
76	60	0.298039	0.235294
90	62	0.352941	0.243137
99	59	0.388235	0.231373
111	66	0.435294	0.258824
122	85	0.478431	0.333333
126	111	0.494118	0.435294
136	124	0.533333	0.486275
161	123	0.631373	0.482353
177	113	0.694118	0.443137
172	92	0.67451	0.360784
158	75	0.619608	0.294118
141	69	0.552941	0.270588
133	58	0.521569	0.227451
138	42	0.541176	0.164706
133	31	0.521569	0.121569
107	27	0.419608	0.105882
81	23	0.317647	0.0901961
59	18	0.231373	0.0705882
48	14	0.188235	0.054902
42	18	0.164706	0.0705882
34	18	0.133333	0.0705882
34	10	0.133333	0.0392157
30	3	0.117647	0.0117647
20	1	0.0784314	0.00392157
8	6	0.0313725	0.0235294
5	0	0.0196078	0
13	0	0.0509804	0
20	2	0.0784314	0.00784314
18	0	0.0705882	0
11	2	0.0431373	0.00784314
11	0	0.0431373	0
18	1	0.0705882	0.00392157
7	3	0.027451	0.0117647
17	2	0.0666667	0.00784314
19	1	0.0745098	0.00392157
4	0	0.0156863	0
6	1	0.0235294	0.00392157
2	0	0.00784314	0
5	0	0.0196078	0
7	0	0.027451	0
6	1	0.0235294	0.00392157
3	1	0.0117647	0.00392157
4	2	0.0156863	0.00784314
6	1	0.0235294	0.00392157
3	1	0.0117647	0.00392157
1	0	0.00392157	0
7	1	0.027451	0.00392157
8	0	0.0313725	0
8	0	0.0313725	0
6	1	0.0235294	0.00392157
3	1	0.0117647	0.00392157
[truncated: 48,628 more rows]

## Sheet: FIG 3D
FIGURE 3D, Colocalization Index						Anova: Single Factor								t-Test: Alk5 and Alk1				t-Test: Alk5 and TBRII				t-Test: Alk1 and TBRII
(with Alpha2)	Alk5	Alk1	TBRII
Slope from 5 ROI	0.6776	0.5185	0.3345			SUMMARY									Variable 1	Variable 2			Variable 1	Variable 2			Variable 1	Variable 2
	0.6054	0.5302	0.2497			Groups	Count	Sum	Average	Variance				Mean	0.58132	0.5309		Mean	0.58132	0.33284		Mean	0.5309	0.33284
	0.5163	0.5066	0.3291			Column 1	5	2.9066	0.58132	0.00398729				Variance	0.00398729	0.00107545		Variance	0.00398729	0.00265134		Variance	0.00107545	0.00265134
	0.5406	0.5118	0.3802			Column 2	5	2.6545	0.5309	0.00107545				Observations	5	5		Observations	5	5		Observations	5	5
	0.5667	0.5874	0.3707			Column 3	5	1.6642	0.33284	0.00265134				Pooled Variance	0.00253137			Pooled Variance	0.00331931			Pooled Variance	0.00186339
														Hypothesized Mean Difference	0			Hypothesized Mean Difference	0			Hypothesized Mean Difference	0
Mean	0.58132	0.5309	0.33284											df	8			df	8			df	8
Stdev	0.063145	0.0327941	0.0514911			ANOVA								t Stat	1.58451			t Stat	6.81926			t Stat	7.25462
						Source of Variation	SS	df	MS	F	P-value	F crit		P(T<=t) one-tail	0.0758685			P(T<=t) one-tail	6.75724e-05			P(T<=t) one-tail	4.38299e-05
						Between Groups	0.17252	2	0.0862602	33.5466	1.21971e-05	3.88529		t Critical one-tail	1.85955			t Critical one-tail	1.85955			t Critical one-tail	1.85955
						Within Groups	0.0308563	12	0.00257136					P(T<=t) two-tail	0.151737			P(T<=t) two-tail	0.000135145			P(T<=t) two-tail	8.76598e-05
														t Critical two-tail	2.306			t Critical two-tail	2.306			t Critical two-tail	2.306
						Total	0.203377	14
														do not reject null hypothesis				reject null hypothesis				reject null hypothesis
														not statistically different				p < 0.001				p < 0.001
