# Supplementary material for: Discrete spatial organization of TGFβ receptors couples receptor multimerization and signaling to cellular tension
Source: eLife. 2015 Dec 10;4:e09300. doi: 10.7554/eLife.09300 (PMC4728123; doi:10.7554/eLife.09300)
Supplement: Figure 4—source data 1. — DOI: http://dx.doi.org/10.7554/eLife.09300.011 [file elife-09300-fig4-data1.xlsx]

## Sheet: FIG 4C
FIGURE 4C, Enrichment Ratio														t-Test: Two-Sample Assuming Unequal Variances
			White Pixels	White Area (um^2)	Black Pixels	Black Area (um^2)	White Tracks	White Tracks per um^2	Black Tracks	Black Tracks per um^2	Enrichment Ratio	%FA
TBRI	Cell 1	Red 1	1308	36.0432	1326	36.5393	119	3.30159	95	2.59994	1.26987	49.6583			Variable 1	Variable 2
		Red 2	798	21.9897	736	20.2812	126	5.72996	80	3.94454	1.45263	52.0209		Mean	1.31382	0.587617
		Red 3	2051	56.5174	2769	76.3026	257	4.54728	314	4.1152	1.105	42.5519		Variance	0.19548	0.0686958
		Red 4	865	23.8359	1254	34.5552	109	4.57293	109	3.15437	1.44971	40.8211		Observations	7	5
	Cell 2	Red	3158	87.0218	4986	137.394	530	6.09042	687	5.00021	1.21803	38.777		Hypothesized Mean Difference	0
	Cell 3	Red 1	1443	39.7633	1308	36.0432	207	5.2058	90	2.497	2.08482	52.4537		df	10
		Red 2	908	25.0208	1437	39.598	83	3.31723	213	5.37906	0.616694	38.7207		t Stat	3.55774
														P(T<=t) one-tail	0.00260038
			White Pixels	White Area (um^2)	Black Pixels	Black Area (um^2)	White Tracks	White Tracks per um^2	Black Tracks	Black Tracks per um^2	Enrichment Ratio			t Critical one-tail	1.81246
TBRII	Cell 1	Red	872	24.0288	2584	71.2047	77	3.20448	417	5.85635	0.547181	25.2315		P(T<=t) two-tail	0.00520077
	Cell 2	Red	3030	83.4947	7771	214.138	575	6.88667	2292	10.7034	0.64341	28.053		t Critical two-tail	2.22814
	Cell 3	Red 1	793	21.8519	2030	55.9387	9	0.411863	72	1.28712	0.319987	28.0907
		Red 2	887	24.4422	1433	39.4877	15	0.613693	57	1.44349	0.425147	38.2328
		Red 3	1011	27.8591	2069	57.0134	48	1.72295	98	1.7189	1.00236	32.8247
		Avg	StDev											reject null hypothesis
	TBRI	1.31382	0.442131	n=7, 3 cells										p < 0.01
	TBRII	0.587617	0.262099	n=5, 3 cells

## Sheet: FIG 4I
FIGURE 4I, Diffusion Coefficient of TBRI														t-Test: Two-Sample Assuming Equal Variances
Inside				Outside				TBRI Inside	TBRII Inside	TBRI Outside	TBRII Outside				TBRI Inside	TBRI Outside
TBRI				TBRI				-0.000685794	0.00534301	0.000510161	0.00148715			Mean	0.0765841	0.121999
	Mean	0.0765841			Mean	0.121999		0.345986	0.000135827	-0.0181125	0.069298			Variance	0.0203973	0.0341443
	SEM	0.00215455			SEM	0.000624178		0.127136	-0.00476124	0.0735146	0.603995			Observations	4394	87640
	N	4394			N	87640		0.239533	-0.000216452	0.582148	0.141435			Pooled Variance	0.0334882
								0.148008	-0.0244869	-0.000615742	0.0206557			Hypothesized Mean Difference	0
TBRII				TBRII				0.1814	0.00550949	0.234094	-0.0421627			df	92032
	Mean	0.0686913			Mean	0.0997301		0.0300645	0.00403764	0.0606552	0.0323947			t Stat	-16.0532
	SEM	0.00191082			SEM	0.000414591		0.103401	0.0964204	0.112117	-0.000265734			P(T<=t) one-tail	3.25533e-58
	N	5204			N	152901		0.142735	-0.073906	0.00351076	-0.00252212			t Critical one-tail	1.64487
								-0.00176805	0.294837	0.00662299	-0.00278162			P(T<=t) two-tail	6.51066e-58
								0.00887333	-0.0103607	0.172301	-0.000215854			t Critical two-tail	1.95999
								0.230931	0.200611	0.156037	-0.0169388
								0.261043	0.102089	0.0359524	0.00108637
								0.133383	-0.00493925	0.00950575	-0.00876354
								-8.91388e-05	0.171763	0.29249	0.0777491			reject null hypothesis
								0.0741782	-0.0449148	-0.00285754	0.00119299			p < 0.001
								-0.00102814	0.0652547	0.00265723	0.119827
								-0.0121805	0.060246	0.0012025	-0.00247041
								0.00119719	0.0879182	0.123163	0.00344322
								-0.00264632	0.00397111	0.00736042	0.0138026
								0.0833308	-0.0183485	0.202922	0.09354
								-0.000247455	0.220831	-0.00049367	0.234189
								0.000750393	0.0589048	0.0456708	0.169338
								0.000220514	-0.00275145	0.0322548	0.234786
								0.000563199	0.22349	0.0311307	0.00492749
								0.000976521	0.00331829	0.000199249	0.0174962
								-3.48663e-05	0.0561581	0.0644884	0.152359
								-0.000685375	0.121641	0.585788	0.0186285
								0.00307197	-0.0107172	0.0983205	0.858211
								0.0535603	-0.0109991	-0.000333939	-0.00409518
								0.0193365	-0.00595773	0.00829922	0.227403
								0.0345485	0.73603	0.0197718	0.0408467
								0.0499799	0.0245809	-0.00500997	0.000794911
								4.8503e-05	-0.00116549	-0.000716465	0.113258
								-0.00433196	0.0816501	0.0286338	0.0297771
								0.00705835	0.0580687	0.0611642	-0.000702837
								0.0842059	0.144713	0.00497866	2.04694e-05
								0.0051159	0.000430132	0.12478	0.0151698
								0.00328352	0.0289519	0.320415	-0.000179525
								0.0967657	0.503357	-0.00576644	0.376162
								-0.00923052	0.135131	-0.007327	0.169606
								0.197485	0.000809718	0.014654	-0.0404351
								0.151164	0.117666	0.0876635	0.00205497
								0.16791	-0.000636162	0.0308635	0.0710418
								0.00428412	-0.000965221	-0.0017201	0.0141539
								-0.00964984	0.00660077	0.140385	0.144866
								0.0491838	0.0697137	0.216139	0.00180584
								-0.00178332	0.0807149	-0.00666214	0.0365175
								-0.00487715	0.00210149	0.224328	-0.00701109
								0.124718	0.193247	0.240426	0.215656
								0.190637	-0.000340299	0.172648	0.15108
								0.172348	0.393771	0.194096	0.000409593
								0.271549	0.00137822	-0.00107895	0.0236978
								-0.00111508	-0.000386684	-0.00911194	0.391898
								0.0518964	0.374322	0.0168898	0.116755
								0.437266	-0.0200691	0.0183628	0.00440501
								0.00197347	0.0916678	0.00860343	0.405308
								0.0719863	0.293821	-0.0385149	-0.0430733
								0.294653	0.000511422	0.00355254	0.0885833
								-0.0108853	0.00637186	0.0182468	0.0410885
								-0.003712	-0.0010717	0.0123311	0.0307281
								-0.000903835	0.00990848	0.00192877	0.0251777
								0.339631	-0.0295192	-0.0217974	0.712551
								0.00321705	0.000276714	0.0198636	0.11211
								-0.000979206	0.000533299	0.0104203	-0.000902331
								0.137228	0.000589129	6.05608e-05	0.0827879
								0.000355685	0.000230273	0.300357	0.148699
								-0.00915403	0.0033254	0.00234017	-0.00371575
								0.00475535	0.294241	0.104661	0.0104094
								0.137321	-0.0353498	0.161133	0.0144872
								-0.000446878	-0.00332782	0.00875945	0.0179806
								0.142747	0.180148	0.146746	0.0540698
								0.0203879	-0.00177322	0.0123056	0.0906414
								0.125047	-0.00153312	0.112734	-0.00741693
								0.195194	0.203273	0.0278828	-0.0161858
								0.00189159	0.00139358	-0.00113377	0.191975
								0.079669	0.0993965	-0.0320811	0.00123003
								0.0170789	0.17591	0.00650537	-0.00467287
								0.0009866	0.00191967	0.109511	0.0932797
								-0.00147539	0.0217612	-0.00526492	0.0398622
								0.53879	0.0649869	0.00676035	-0.00277346
								-0.000504993	-0.000481538	-0.0422339	0.027976
								3.2759e-05	0.265091	0.0121179	-0.000593807
								0.00161211	0.811688	0.332071	0.0495442
								0.00391964	0.332852	0.424899	0.00180523
								0.263518	-0.0676079	0.354727	0.0758866
								-0.000739922	0.000229395	0.0444436	0.00223598
								0.0610207	6.30007e-05	0.664327	0.279551
								-0.00226096	-0.000642255	0.5947	0.22534
								0.00114169	-0.00011012	0.00105486	0.0079828
								0.267899	0.00105283	0.0215827	0.393546
								0.0264185	0.00662291	0.00896518	-0.00363699
								0.000176857	0.00182341	-0.00807248	0.561798
								0.00408001	0.0903953	0.110642	-0.00331855
								1.0636	0.00016621	-0.00341305	0.344866
								0.0265853	0.371636	-0.0653741	0.0704096
								0.00325299	0.00069566	0.00362643	-0.00503711
								0.0874364	0.758381	0.137713	0.209071
								-0.00033242	0.623311	0.284146	0.0369841
								0.109497	0.0786489	0.116798	0.314675
								0.18775	0.000358345	0.0244609	0.170636
								-0.00227335	0.0555241	-0.00578939	0.153202
								0.039323	-0.000790913	0.317493	0.279165
								0.120242	0.00163844	0.657579	0.0283315
								0.0105498	0.301206	0.0950867	0.000716585
								0.269013	0.915709	0.607604	-0.0241052
								-0.00392278	0.00153422	-0.028861	0.0318188
								0.0852974	0.00478809	-0.0389211	0.000413707
								0.0229102	0.0803703	0.141755	-0.000737065
								-0.000821939	0.0467338	-0.00385437	-0.00211104
								0.0569164	0.00139516	0.129104	0.0114953
								-0.00459398	0.219133	0.709954	0.132715
								0.1076	-0.000498845	0.316406	0.000729654
								-0.0198934	-0.00445572	0.292817	0.355596
								0.083234	0.0111891	-0.0171969	0.00249997
								0.00133306	-0.0077086	-0.00219525	0.000977313
								0.041473	0.00332202	0.0409429	0.00352668
								0.0446434	-0.00197041	0.8135	0.0446182
								0.912568	0.0609746	0.491145	0.0847074
								-0.0011717	0.0849884	0.0800326	0.0016852
								0.700817	0.00094866	0.00283901	0.0650209
								0.22656	0.040906	-0.000439696	-0.0067008
								0.0420402	0.00955516	0.0140008	0.0385613
								0.0431817	0.14707	0.603942	0.122032
								-0.00241998	-0.0035108	8.0202e-05	-0.0071082
								-0.00495558	0.315195	0.00234625	-0.0127222
								0.0147159	0.177903	-0.000972539	-0.0620149
								-6.09536e-05	-0.0026258	0.00517966	0.306212
								0.303055	0.00275542	0.0277271	-0.000732996
								0.349504	0.142283	0.102367	0.0424234
								0.0330223	0.0168098	0.00466099	0.000200305
								0.296996	0.000330232	0.180386	0.0140727
								0.00651055	0.0237443	0.0524728	0.130527
								0.185546	0.0415031	0.394021	0.814763
								-0.00241678	0.096191	0.000501179	0.00193687
								-0.000666907	-0.00395606	0.00106609	0.00198849
								0.00614617	-0.00413799	0.106114	0.00435709
								0.0919225	0.0236827	0.366934	0.187566
								-6.2598e-06	0.00418	-0.0142954	0.157185
								-0.00373923	-0.00901658	-0.000236288	-0.0033806
								0.328794	0.006666	0.00825551	0.0276225
								-0.0602719	0.136923	0.0611132	0.0198208
								-0.0163718	0.102772	-0.0752973	0.084199
								0.00477538	0.497894	0.0952552	0.379669
								0.159131	0.0724808	-0.000755693	0.0143936
								-0.00122526	-0.000759314	-0.0181899	0.196928
								0.273908	0.007886	0.0225299	0.0806443
								0.176876	0.0116404	0.00432665	0.00211957
								0.00918595	0.00139464	0.127746	0.37503
								8.46727e-05	-0.00872028	0.346996	-0.00339208
								0.0377801	-0.0127272	0.0572225	0.0786741
								0.000970875	-0.000563531	0.0018555	0.0692612
								0.118331	0.0010427	0.000481464	0.0116763
								0.00100081	-0.074501	0.459472	0.03624
								-0.00164077	0.0022391	0.0717893	0.0147794
								0.268871	0.00436265	-0.00121881	0.0177671
								0.00889575	-0.000242771	0.0492334	0.00889756
								-0.00572631	0.0259481	-0.00122062	-0.00516376
								0.343324	0.0156431	0.0449281	0.212592
								0.497953	0.00854878	0.013312	0.0734403
								0.0055992	0.00674458	0.371985	0.0534623
								0.00175809	-0.000252149	0.0454065	0.233877
								0.027111	0.112253	-0.00761389	0.00653551
								0.000595445	-0.00752798	-0.00141553	0.554288
								0.14326	-0.0109239	0.108418	0.00303808
								0.000325639	0.0447881	-0.0044704	0.332625
								0.110285	0.0060223	-0.0248259	0.296165
								-0.01126	-0.000177555	0.136602	0.00557755
								-0.000370458	0.124379	0.255421	0.445272
								0.0562918	0.00099306	0.0915857	0.0541789
								0.00766042	-0.0258813	0.0353292	0.0688782
								-0.00525231	-0.00272872	0.144162	0.198835
								-0.00146453	-0.00459222	0.0855437	0.00103879
								0.276786	-0.000783217	0.0345398	0.0198332
								0.285925	0.249005	0.560511	0.151847
								0.00150654	0.0302052	0.000867143	0.0315393
								0.143421	0.0253266	0.0442641	0.110668
								0.00254433	0.507289	0.480172	0.00146716
								0.000366361	0.0074348	0.00356564	0.171087
								-0.0103469	-0.000242374	-0.00210016	0.173854
								-0.0288255	-0.016509	-0.00147057	0.0212133
								0.00826301	0.126038	0.346781	0.00300384
								0.46676	0.00197336	0.14731	0.0264813
								0.000397722	0.000290106	0.437855	-0.000396954
								4.26263e-05	-0.00188036	-0.00728389	0.0665055
								-0.000724566	0.0112881	0.105286	0.0682822
								0.0261074	0.13798	0.0119134	0.0223797
								-0.0072325	0.719097	4.35607e-05	0.00711136
								0.0173942	0.00226887	0.154467	0.00196787
								0.0015689	0.000991184	0.0197222	0.00424832
								0.0510271	0.0221658	0.0408591	0.000252998
								0.00285772	0.116767	0.288028	0.908122
								0.0423234	-0.00749251	0.00673906	0.0815484
								-0.00117087	0.0150904	0.0179888	0.218862
								4.68503e-05	-0.022075	0.521905	0.0585791
								-0.00292016	0.0236058	0.152712	0.0884886
								0.500682	-0.0125621	0.351661	0.00697126
								0.0478322	0.0415082	-0.00147061	-0.0345326
								0.00131445	0.0320546	0.397913	0.197643
								-0.00436212	0.00365196	-0.0360591	-0.000991304
								0.0209322	-0.00163331	0.125007	0.00451545
								0.0114077	-0.00722537	-0.0183747	0.355368
								-0.000730174	0.0472655	0.254959	0.0360798
								-0.0132233	0.0161868	0.37179	0.175106
								0.000586113	0.00321454	0.433524	0.00290697
								0.0125529	-0.00317273	-0.0337664	0.100477
								0.00817275	0.000626412	0.313613	0.131868
								0.0812812	-0.00600971	0.195998	0.0582956
								-0.00471044	-0.0145244	0.194398	0.00337873
								0.232803	0.000938418	0.12816	0.144216
								0.0435269	0.688777	0.000324463	0.124782
								0.0190428	2.15198	0.214608	-0.0604517
								0.319718	0.0307354	-0.00291029	0.00155225
								0.0054221	0.00200218	0.0347519	0.409132
								0.00188712	-0.00295265	0.0322381	-0.0123102
								0.00107981	0.0174977	0.00749514	-0.00372702
								0.0886067	-0.0118388	0.00427406	0.031011
								0.432205	0.00120301	0.333261	0.0852948
								0.175973	0.0199416	0.0157293	0.173649
								0.375592	0.120991	0.324825	0.00227072
								-0.00246357	0.111609	0.050409	-0.0142513
								-0.00194728	-0.00862162	0.0429141	-0.0451711
								0.0759472	0.00271345	0.0976552	0.526066
								0.00272838	-0.000504359	0.198405	0.00390464
								-0.00625282	0.00253409	0.228815	0.105299
								-0.0021751	-0.00525208	0.701	0.00457599
								-0.00115949	0.00673371	0.164412	-0.0268921
								-0.0160201	0.168788	0.416336	0.0415868
								0.00221117	0.450423	0.0521449	0.282405
								0.155627	0.00035375	0.0329142	0.0668589
								0.000994023	0.0187249	0.0442707	0.0023357
								-0.000144044	0.0684048	-0.00159583	-0.00398017
								-0.000212664	0.0250944	-0.00560611	0.100182
								0.0765172	-0.00248291	0.0120618	0.154959
								0.0406933	0.248114	0.00191248	0.00290464
								0.000754647	0.000202852	0.00120396	0.148445
								0.000611557	-0.0115642	0.0016581	8.99218e-05
								0.177556	0.00165282	0.537435	0.00520174
								0.0561706	-0.00505426	-0.000148527	0.0710589
								0.146351	-0.000886289	-0.00941954	0.391386
								0.254345	0.000529422	0.0895821	0.57582
								-0.0560643	0.0112555	0.00200491	0.228791
								0.156262	0.16225	0.344451	0.0564806
								0.0421191	0.161952	0.246595	0.0533073
								0.00046917	0.000254856	-0.00220098	0.186309
								0.0296895	-0.0105783	0.0658175	0.0891288
								-0.000138051	0.0108743	0.0764445	-0.00880573
								0.0143391	0.224058	-0.00110379	0.00643523
								0.347109	-0.000654036	0.0837227	0.240733
								0.000120139	0.00310695	0.0929083	0.01089
								4.42579e-05	0.413248	0.0532534	0.52064
								0.0832852	0.0288421	-0.00076724	0.0103923
								0.00554088	-0.000837026	-0.00584766	-0.00192516
								0.0632125	0.0276382	0.0514672	0.164953
								0.0400339	0.00601357	-0.000710437	0.136047
								0.000221772	0.172866	0.417607	0.00586127
								0.0131592	0.0834628	0.057433	0.328283
								0.0359731	0.148971	0.287221	0.155043
								0.172626	-0.00103201	-0.0324279	0.18491
								9.35036e-05	0.000663889	0.136307	0.0593326
								0.079623	-0.00677853	0.00027017	0.0391827
								0.000709369	0.322717	0.465718	0.00185937
								0.0114321	0.00509421	0.000509461	0.324863
								0.378531	0.45782	0.0220674	0.188758
								0.0345627	-4.61928e-05	0.00788254	0.118116
								0.0980658	-0.0270256	0.0754708	0.30369
								-0.0456484	0.0357625	0.0662453	-0.0182962
								-0.00217964	0.187484	0.97531	0.014219
								-0.0018212	-0.000809487	0.752155	0.109378
								-0.0231812	0.00149135	0.00787367	0.0013054
								-0.000313031	-0.00538814	-0.0349716	0.00886646
								0.000605282	0.15357	0.1618	0.484911
								0.0449339	-0.00173858	0.00753134	-0.00106756
								0.00468734	0.0878788	-0.00143152	0.131972
								0.457288	-0.0135524	0.000699431	2.10205e-05
								-0.00228127	0.332813	-0.00896621	0.00405276
								0.174293	-0.0192664	0.0670834	0.0309899
								-0.00156227	0.000578381	0.157871	0.00958745
								-0.0437888	-0.00415298	0.0946121	0.00899431
								0.0146912	0.0217448	0.00122761	0.322956
								0.159951	1.77104e-05	0.00403664	0.641966
								0.000526373	-0.00164028	0.0749197	-0.00385641
								0.020126	0.0294628	0.0944682	0.305548
								0.0840663	-0.00372702	0.427818	0.562238
								0.00236217	0.00694579	0.0259748	0.00202943
								0.000380584	-0.0203297	-0.00321848	-0.00457809
								-0.00232154	0.000419683	-0.0188954	0.214692
								0.00812505	3.60405e-05	-0.00403069	0.562971
								-0.000441681	0.00652151	0.00366752	0.338519
								0.174264	0.0167639	0.118693	0.00695944
								0.0797483	0.000989211	0.130205	0.0805845
								0.0573794	1.06045e-05	0.142855	-0.00199282
								0.0593998	0.380268	0.0186836	0.090911
								0.000913705	0.00165501	0.00406864	0.12108
								-0.000228698	-0.0015865	0.507021	-0.011241
								-0.00849343	-0.000551417	0.720222	0.0431269
								-0.0131987	0.132028	0.0215998	0.0270427
								-0.041111	-0.000537043	0.0334803	0.33023
								0.0763434	0.00120486	0.363755	0.0133002
								0.000434138	-0.00510597	0.0421847	0.154943
								-0.00151958	0.0926055	0.472874	0.415196
								0.285777	-0.00162387	0.101615	0.452942
								0.0029986	0.00380858	-0.00071335	0.315822
								0.100506	-0.000146139	-0.00271453	0.176767
								0.00248359	0.00217732	0.0931776	0.340947
								0.0365635	0.000127789	0.0188072	0.0468238
								0.000716053	0.187319	-0.00254231	0.00375552
								0.0787513	0.000370606	0.00972808	0.0305303
								0.00427717	0.00466559	0.0268405	-0.00253401
								-0.00148689	0.173342	0.00108286	0.00198998
								0.120509	0.0420163	0.0236609	0.124105
								0.0141505	-0.00181412	0.047433	0.0284884
								-0.00459541	-0.0003646	0.229964	0.00916657
								0.0576182	0.105163	0.524268	0.259258
								-0.019549	-0.0102699	0.000551627	0.142755
								0.0025507	-0.00204406	0.174309	0.25314
								0.000603792	0.311916	0.0065548	-0.000339998
								0.647655	0.0260785	0.0534681	0.0654753
								-0.00565331	4.72592e-05	0.18652	-0.00249359
								0.00324523	0.000637715	0.342528	0.00927022
								0.0654187	0.165902	-0.0011682	0.0177209
								0.00436708	0.000140004	0.00329629	0.117469
								-0.0193413	0.153535	0.182785	0.00592431
								0.437592	0.000496845	-0.002948	0.228233
								0.0014292	-0.00497955	0.000988988	-0.000240227
								0.050706	0.000380332	0.0226027	0.00272589
								0.395965	0.00535486	0.0124049	0.198627
								0.156447	0.00124878	0.400489	0.000730659
								0.0115841	-0.0187977	0.129506	0.108378
								0.00143491	-0.000418461	-0.00037909	-0.000678509
								0.19124	0.596965	0.0281395	-0.0667617
								0.00166549	0.0661325	0.0395938	0.161924
								0.00161959	0.00471947	0.0875567	0.0540997
								0.0139299	-0.00401913	0.00057314	0.127692
								7.12713e-05	0.155934	0.0192274	0.303346
								0.00144403	0.291134	0.43364	0.181992
								0.0122451	0.237885	0.0198955	0.0112081
								-0.0055685	1.15022	0.00248401	0.104439
								0.372342	0.00425099	0.0223957	-0.00163503
								-0.00221151	0.0110798	0.0371116	0.00330586
								-0.0180256	0.718597	-0.00307474	0.00860877
								0.009629	0.191891	-0.00252308	0.00799679
								-0.015028	0.00966547	-0.00182112	0.000784166
								-0.0166086	0.00700983	0.102731	0.00538991
								-0.000503433	0.156662	0.501073	0.201519
								0.16919	0.00316476	0.00298343	0.0697243
								0.435871	0.134253	-0.0021113	0.0731654
								0.0493287	0.00412251	0.000592421	-0.000440227
								0.0474441	0.0396133	0.0574366	-0.0138768
								0.171029	0.00303906	-0.00281294	0.72564
								0.0282872	0.00777208	0.00455504	0.258007
								-0.00123939	0.00477463	0.0449778	-0.000249029
								0.213967	0.353125	-0.00115485	0.989536
								-0.042392	0.0598856	-0.0680722	0.150589
								-0.000676903	-0.00165884	-0.00235638	-0.00684209
								0.0117866	0.131291	0.0370581	0.345552
								0.0240372	0.0122669	0.427873	0.0164806
								0.00352847	-0.000933593	0.046729	0.331297
								3.08091e-05	0.00241266	0.264974	0.493979
								-0.00281138	0.00213542	0.887536	-0.00142388
								-0.00265952	0.0327109	0.00182784	-0.00193243
								0.70675	0.000858402	0.0043851	0.190974
								0.0111343	0.169376	0.132258	0.0798217
								-0.00868205	-0.000317729	-0.0220361	0.0255044
								5.77323e-05	0.090311	0.0091423	0.0603055
								0.000711418	0.00409643	0.000859213	0.523077
								-0.00209482	0.237314	0.0559443	-0.00213268
								0.00530029	0.0379934	0.0230507	0.462491
								0.000919832	0.0458422	0.0954175	0.0164059
								-0.0065219	0.000526429	0.147226	0.00292439
								-0.000351853	0.0209824	0.0592013	-0.000255261
								-0.00450747	0.0753629	0.0119706	0.00133184
								0.177478	0.0615826	0.00690543	0.344873
								0.000854831	-0.00106409	0.0124024	0.049293
								-0.000404117	0.00122489	0.0350273	-0.00883456
								0.00515695	0.00293159	0.00945859	0.000313634
								-0.000410863	0.00161542	0.00287082	0.435085
								0.0736536	-0.00220837	0.195564	-0.00341516
								0.312207	0.100757	0.742544	-0.00316049
								-0.00319142	-0.00484136	1.14473	0.0263079
								0.0012078	0.0114238	-0.00544155	0.0287157
								-0.000988086	-0.00271758	-0.00984917	0.134289
								0.148968	0.00123586	0.195754	0.221383
								-0.000386064	0.0563235	0.00100209	0.0540115
								-0.00694548	0.062105	0.000140455	0.516943
								-0.000516383	-0.000582664	0.00482685	0.000990547
								0.00467337	0.000512627	0.320358	-0.0063916
								0.00104198	0.000547707	-0.00104098	0.0617274
								-0.00310764	0.0189699	0.230969	0.123872
								-0.00114724	0.00080396	0.235944	0.482391
								0.000331604	0.00787219	0.505639	-0.00652184
								-0.000357316	0.00947043	0.115744	0.00245357
								0.254974	0.0181575	0.251644	0.282217
								0.000138923	-0.00270253	-0.000480206	0.242777
								0.0573488	0.00108964	0.000233709	0.00272272
								0.0117128	-0.000596059	0.00676397	0.0946679
								9.24046e-05	0.00318839	0.0023393	0.364363
								2.57435e-06	0.0914442	-0.00579268	0.00944499
								0.216924	-0.00486362	0.278708	0.00415298
								-0.00469798	-0.0219654	0.0210098	0.14013
								0.0908315	-0.00774723	0.0125121	-0.00116013
								0.0872568	-0.000680373	0.00361033	0.0582604
								0.000484483	0.0262906	0.061752	0.168649
								0.0455868	-0.000708304	0.00389139	0.00120335
								0.000497954	-0.000409765	0.0148425	-0.0205281
								-0.00546529	0.00169135	-0.00202286	0.0597375
								0.0014573	0.00462179	0.04452	0.030391
								0.00231287	-0.000277598	-0.00761056	0.28941
								-0.00097543	0.00528969	0.00207291	-0.00252222
								-0.0283168	0.00433449	0.168	0.128668
								0.000706929	-0.00412079	-0.00158451	0.0200694
								-0.00307081	-0.00428243	0.1977	0.153377
								-0.00959061	0.0127609	0.992139	0.353388
								-0.000257977	-0.00614701	-0.0106988	0.152489
								0.0041059	-0.0114652	-0.00689513	0.0415876
								-0.00569815	0.00200726	0.0115811	0.012696
								0.13618	-0.00397665	0.000419158	0.000580001
								-0.00378878	-0.015567	0.339334	0.0695476
								0.00152449	0.00229364	0.000798626	0.509426
								-0.00143501	0.00537133	0.193589	0.218135
								0.243151	-0.002745	0.130703	-0.000834064
								-0.000240268	-0.00788672	0.124082	-0.00475717
								0.000265323	-0.00093125	0.155456	0.127934
								-0.00618071	0.00035478	-0.00386296	0.0329454
								0.158437	0.0318375	0.121351	0.00481594
								-0.00224565	-0.00428907	0.401144	0.067358
								0.0031909	-0.0113741	-0.0145357	0.0270796
								-0.00555004	0.00998	0.0665773	0.00283484
								-0.00942332	0.013679	-0.0023404	-0.00156128
								0.0263343	0.0126449	0.174372	0.273391
								-0.00430691	0.0212214	0.201002	0.00870651
								0.0901279	0.152002	0.0246009	0.0594612
								0.0661695	-0.000230048	-0.000890093	0.177732
								0.129924	-0.00640573	0.0534905	0.139881
								0.000430951	0.0222873	0.0811229	0.0497719
								-0.00251029	0.00698895	0.269724	0.081681
								0.512559	-0.000230086	0.00126461	-0.00416545
								-0.108403	0.00199066	-0.00114258	0.0310877
								0.00188615	0.0104615	0.0952885	0.164845
								0.130874	0.0803908	0.0590309	0.467489
								0.155311	-0.0146897	0.182694	-0.00160479
								0.154183	0.0123165	0.251099	0.0338669
								0.00241201	0.00148606	0.384457	0.455651
								0.0104806	-0.00242769	0.00215473	0.0124639
								-0.00192345	-0.00556475	0.0790661	0.0283855
								-0.0182449	0.228658	-0.00979472	-0.00651665
								0.00116378	0.00134603	0.000168582	0.194886
								0.0777052	0.000270945	-0.0011651	-0.00329579
								0.15235	0.0289749	0.00192473	0.510131
								0.00460102	0.00200308	0.018843	-0.00290596
								-0.00477684	0.225368	-0.00294953	-0.0607113
								0.42743	0.899494	-0.00214854	-0.00685222
								0.000499468	0.11471	-0.0255289	0.0353457
								0.00269143	0.00405079	0.00496414	0.0154134
								0.104708	-0.0061264	0.0309034	0.000212538
								0.00802528	0.00280732	0.348839	0.00603022
								0.252105	-0.00217566	0.0122496	0.0416363
								-0.00141769	0.0556481	0.0566778	-7.75754e-05
								-0.000161043	-0.00107755	-0.0469897	0.418118
								0.195256	0.0566847	0.121137	0.193805
								0.00307364	0.149704	0.206505	0.0169302
								0.324278	-0.00118932	0.00054166	0.0941332
								0.00590575	0.143749	0.34745	0.398915
								0.00344539	-0.0223701	0.437274	-0.00515282
								-0.0016382	0.00136376	0.204623	0.0723375
								0.302307	0.0299839	-0.000844296	-0.00767632
								0.000154559	0.00226675	0.00145234	0.125657
								0.00072702	0.04386	0.144582	0.00221428
								-0.00723696	0.0296794	0.599511	0.173569
								0.163733	-0.00036554	0.153498	0.023955
								-0.0592319	0.121901	0.0337825	0.148557
								0.000388999	-0.0147667	0.00751097	0.000784381
								0.382447	0.0291023	0.0592564	0.697236
								0.00225385	0.00297222	0.00482547	0.0951755
								0.159447	0.00248232	0.0205661	0.00440928
								0.0241007	0.269678	0.0842826	-0.00204135
								-0.000430401	-0.013313	4.13821e-05	0.162441
								-0.00393866	0.000236226	5.83424e-05	-0.000628364
								-0.0035245	0.00684932	0.471251	0.142008
								-0.00691853	-0.00103777	0.0137004	0.00498853
								0.434474	-0.00811829	-0.000510619	0.323972
								0.000881082	0.306213	-0.0480342	0.0903472
								-0.00367735	0.000635154	0.0182291	0.0647577
								0.000249567	0.017925	0.0028152	0.00550778
								0.385509	-0.00471013	0.0466433	0.00166
								0.00512174	0.0864766	0.00773705	0.000200943
								-0.00926404	0.0407758	-0.00165407	-0.00115818
								-0.0038047	0.0181775	0.32262	0.0174445
								-0.000493415	-0.00321019	0.336745	-0.0033763
								0.00426744	0.00144112	0.00267222	0.00795364
								-0.00796364	0.642708	0.0200142	0.0025077
								-0.000782588	0.0181288	-0.00675242	0.175441
								0.000293948	0.109445	0.343787	0.0964318
								0.00589194	0.276031	-0.00228006	0.0119668
								-0.00455258	0.000993702	-0.00714047	0.0198247
								0.0349053	-0.000853715	0.361874	0.117301
								0.323296	-0.000681674	0.860481	0.0312375
								0.0176077	0.0414634	0.233432	0.0168173
								0.00492088	-0.0226074	0.0156207	0.0147057
								-0.00820375	-0.000512229	0.522282	0.00319199
								0.0166841	0.0192833	0.0016129	0.000407644
								0.0531787	0.00289019	0.00174614	0.149847
								0.0219188	0.41231	-0.0129661	0.162414
								0.167943	0.0942996	0.369768	0.0115572
								0.0196794	0.050529	0.0166225	0.00350157
								0.0036649	0.150668	0.0146521	-0.00595505
								0.000228345	0.0280633	0.655124	0.317415
								0.00276804	-0.00629633	0.155829	-0.015148
								-0.021391	0.107579	0.0220013	0.0290061
								0.0882642	0.0156554	0.0167296	0.0466935
								0.00369082	0.0051758	0.179786	0.340535
								0.0014107	0.32892	0.00117511	0.0489078
								0.00285501	0.00266932	0.010428	0.314123
								0.0756565	0.217934	3.44358e-05	0.558811
								0.011811	0.162945	0.0162585	0.0946226
								0.0689978	-0.00025244	0.118951	0.0367245
								0.0310502	0.0020351	0.000347106	0.0016709
								0.127873	0.0290311	0.144771	0.0286586
								0.0317236	0.248603	0.413109	0.0445083
								-0.00679905	0.00158897	0.0226968	0.498216
								0.000363172	0.112905	0.121727	0.00114225
								0.00673058	-0.012991	0.147181	0.0122799
								0.00148574	-0.00403693	0.0177305	0.00146732
								0.199934	0.00407132	0.00977575	0.233354
								0.436739	-0.00826427	0.00878416	-0.0011412
								0.0476605	0.0611479	-0.00216427	0.0176181
								0.0128245	0.287957	0.131892	-0.00890299
								0.247001	0.180963	0.000943068	-0.00318784
								0.00162428	-0.000400569	0.0081148	0.199727
								0.163507	-0.00444057	0.11704	-0.00209616
								0.117146	0.0343429	-0.00217182	0.0505106
								-0.00793778	-0.00613167	0.0576352	0.00447024
								0.183668	0.00421402	-0.0256721	0.0469401
								0.301645	-0.00265603	0.187904	0.56899
								-0.0196457	-0.00964337	0.335278	0.205013
								-0.000239607	-0.00096622	0.124553	0.127022
								-0.000214926	0.0130321	0.0997897	0.0623244
								-0.0127909	0.00254226	0.0953481	0.152202
								0.202852	-0.00540421	-1.92867e-05	0.176908
								0.0329636	-0.00152962	0.00180933	0.0773407
								0.003163	0.0308303	0.00610578	0.137223
								0.000869621	0.00578319	0.311748	-0.0039047
								-0.000760122	0.00913194	0.0805371	-0.000733727
								0.26478	0.00163905	0.309442	0.03324
								-0.00155358	0.277828	0.502751	0.211725
								0.0165978	0.169195	-0.0353199	0.143036
								-0.00157138	-0.0101693	0.0641386	0.551584
								0.0155095	0.0458614	0.0392371	0.000871453
								-0.0194225	-0.00420177	0.0351287	-0.00512401
								-0.000662477	0.0323233	0.0784572	0.0144633
								-0.00192067	-0.000664864	-0.00428522	0.198977
								-0.000364643	0.0880014	-0.0315032	0.106494
								0.00219711	0.0641874	-0.00379027	0.0816837
								0.02881	0.181816	0.0701206	0.208984
								-0.00141408	-0.00198388	0.037681	-0.00038991
								0.659471	0.00247874	0.00108906	0.00185808
								-0.00192204	0.145394	0.332886	-0.00413697
								0.0342627	0.0154043	-0.0135803	0.0950384
								0.0314536	0.00434153	0.0537536	0.000257562
								0.0387849	0.0775411	0.381341	0.417405
								0.00172349	-0.0013095	-0.00280755	-0.0187503
								-0.0057171	0.00116758	0.0458455	-0.00859207
								-0.0020372	0.0237605	-0.00302146	0.286177
								0.0115118	0.00139395	0.465077	0.0431455
								0.00400737	0.21538	0.189703	0.168526
								0.143802	0.00210406	0.0290717	0.289565
								0.0130022	0.0363751	0.174603	0.00275328
								0.00555031	0.0162576	0.306095	0.149498
								0.00157812	0.00464354	0.239889	0.00574709
								0.554773	-0.0763688	0.179508	-0.0407049
								0.00525577	0.0207043	0.0878202	0.0327399
								-0.00478318	0.0733465	0.164586	0.0444636
								0.000313537	0.00949677	0.00185936	0.149415
								0.209157	0.00710318	0.0267285	0.219467
								-0.00104497	0.0089255	0.507304	0.004756
								0.0836967	-0.000206594	0.0958049	0.169289
								0.00347866	0.00214596	0.130918	-0.0214018
								0.0313106	0.00250298	0.300022	0.391908
								0.00163425	0.105437	0.142206	0.046164
								-0.00448668	0.00507014	0.150066	0.0803988
								-0.0191586	-0.00203064	-0.00111439	0.133782
								-0.0266043	0.107023	-0.0177982	0.0179311
								0.266524	6.91943e-05	-0.00277491	0.000870586
								0.23671	0.0197055	0.00737192	0.0100389
								0.481107	0.000962158	0.32337	0.087844
								0.000328611	0.189367	-0.0015846	-0.00348142
								0.00261891	0.00181329	0.00185615	0.222471
								0.0100259	0.00311964	0.000592107	0.242338
								0.00250674	0.262586	0.203191	0.0934056
								0.00101665	-0.0251302	0.00321238	0.00367745
								0.0975659	0.0766143	-0.0148094	0.440392
								-0.00353572	-0.0235188	0.11984	0.107188
								0.0674629	0.000616814	0.623571	0.781866
								0.00231355	0.144788	0.0150165	0.00108722
								0.129824	0.413902	-0.00150435	0.0869067
								0.00105182	0.00200551	-0.00201916	0.157664
								0.119888	-0.0203799	0.00217973	0.113357
								-0.000420773	-0.00177961	0.000871082	0.0692077
								0.0062497	-0.00073423	0.017287	0.00243534
								0.162419	0.0134274	0.319913	-0.0103053
								-0.0330074	0.199391	-0.00576982	-0.000412942
								0.461215	0.00119999	1.11428	0.0210979
								0.00435489	0.00143215	0.00126925	0.312918
								0.0260707	0.025457	-0.00111819	0.319584
								0.000951473	0.0475281	0.236066	0.111889
								0.217311	0.00289073	0.35274	0.315793
								0.0376302	0.0182932	0.0389101	0.0367943
								0.365118	0.465536	0.199565	0.105939
								0.202731	0.00758152	0.00245717	0.0566162
								-0.00113623	0.00399861	0.0184531	0.0385225
								0.00293153	0.00752445	0.000217486	0.0103438
								0.293974	0.00106369	0.0767712	0.000143991
								0.116692	0.00705977	0.095421	0.236932
								-0.00466911	0.0105658	0.238585	-0.00113455
								0.0693607	4.62276e-05	0.0561565	0.141653
								0.0295103	-0.00168929	0.00448374	0.681192
								-0.000272731	0.11074	-0.0121824	0.131103
								0.0105688	0.0342546	0.161889	0.173861
								0.219122	-0.026404	-0.00130149	0.164322
								0.0946955	0.0564356	0.00354258	0.100109
								0.173093	3.20977e-05	0.000955623	0.00291388
								0.0375245	0.0470691	0.0689588	0.00260469
								0.0113712	-0.000952874	-0.00109172	-0.00817356
								0.348529	-0.000111063	0.00177626	0.543077
								-0.00588803	0.420205	-0.0479949	-0.0111176
								0.000292611	0.0630284	0.468949	0.00487171
								-0.00367455	0.0281299	0.0491984	-0.000311857
								-0.0106462	-0.00958927	0.0233294	0.652338
								0.280591	0.0450318	0.000833426	0.096326
								0.0118032	0.000647122	0.07621	0.21601
								0.0214184	-0.00115813	0.202575	0.0694004
								0.0167847	0.120826	0.00563155	0.150572
								0.0615208	0.198784	0.185536	0.0733941
								-0.0256926	0.0242326	-0.000669909	0.0977801
								-0.000204485	0.0164459	0.97945	0.158105
								-0.00276603	0.151014	0.000735883	-0.00620437
								-0.0112175	0.123618	0.276301	0.0625264
								-0.000889586	-0.0119573	0.000139101	-0.0058577
								0.259556	-0.0106594	0.000707065	0.0109416
								0.000242409	0.0939253	0.010517	-0.0142151
								0.00239487	-0.00477806	0.121971	0.00535308
								0.0159423	0.304086	-0.00410212	0.137896
								0.00245834	0.012356	0.0253093	0.107223
								0.11351	-0.00450908	0.00144139	0.0188824
								0.494018	0.00440691	0.0283961	-0.0201069
								0.00381515	-0.00221984	0.212241	0.500505
								-0.0204641	-0.00121682	0.157221	0.0613843
								0.152222	0.182761	0.00096063	-0.0232457
								0.0080468	0.0460775	0.213122	0.00154669
								-0.0151702	0.127047	0.00456172	0.0484855
								-2.50198e-05	-0.00235151	0.102058	-0.00159769
								0.00465858	0.0244124	-0.0134923	0.00199354
								0.00187893	0.0921078	-0.0662849	0.0304107
								0.0932913	0.0489698	0.0752278	0.0104278
								0.234548	0.137332	0.748626	0.530484
								-0.00260941	-0.00405714	0.00143467	0.293494
								0.089635	-0.0169705	0.19195	0.0176094
								0.00357847	0.00818769	0.273837	0.0302083
								0.374992	-0.0104901	0.0105955	0.125737
								0.00323474	0.00246353	-0.0196676	0.107589
								0.0359552	0.0742107	0.090848	0.469044
								0.0449593	-0.00965003	0.0566373	0.050532
								0.00683478	0.0601862	0.200341	0.317239
								0.0222356	0.008932	0.00628711	0.00208479
								-0.00409436	0.0817754	0.0481752	0.264928
								-0.0449478	-0.00623439	-0.00159023	0.0107287
								-0.0274015	0.102408	0.026496	0.109747
								-0.0126955	-0.00132073	0.223446	0.0471694
								0.112501	0.319013	0.502797	-0.0987166
								0.185836	0.00252449	0.00157575	-0.0316567
								-0.0402567	0.000607063	0.0274966	0.0296493
								0.0242647	0.00282345	0.00267048	0.14723
								-0.0102729	0.0402005	0.00147462	0.011732
								-0.0175873	0.026419	0.668561	0.381571
								0.0521406	0.0985653	0.000738937	-0.0295597
								-0.000358242	0.130301	0.00075102	0.0342794
								0.0112816	0.115053	-0.000986327	0.26989
								-0.00526518	0.0025519	0.0869252	-0.00121271
								0.0128947	0.111527	0.0634285	-0.0102136
								-0.000671044	-0.0185265	-0.00458412	0.189244
								0.0254431	0.26519	-0.0105834	0.00648381
								0.00865887	-0.0034703	0.337472	0.162315
								0.00925588	0.182714	0.000292407	0.134499
								0.203869	-0.00482441	0.000473102	0.23699
								0.0134139	-0.0122643	0.0420849	0.000967519
								-0.00473527	0.00594876	0.0766977	0.0103089
								0.00580625	0.0461195	-0.00335989	0.470268
								-0.00518638	0.0856663	0.00154088	0.0467292
								-0.00405599	9.27009e-05	-0.00594935	0.224789
								0.0583663	0.00209335	0.319266	0.00338885
								-0.00101585	0.00380301	0.284483	0.181146
								0.00538914	0.00725321	0.196214	0.0199369
								0.935332	0.0212219	0.270383	0.463354
								-0.00490546	0.340581	0.051479	0.00922721
								0.345898	0.141249	0.0399151	0.00341638
								0.00886901	-0.000842083	-0.00217259	0.183678
								0.0711297	0.257817	-0.00978927	-0.0825944
								-0.0136026	0.0554814	0.0383043	-0.00191258
								0.0689795	-0.00210228	-0.00167373	0.0944242
								0.00169827	0.121144	0.172083	0.429635
								0.000782395	0.132449	-0.0128901	0.102233
								-0.0176136	0.000406206	0.0526433	0.0711278
								-0.0022856	0.000165299	0.0674427	0.00333751
								0.309451	-0.00719032	0.000688801	-0.00850848
								0.38291	0.0250232	1.16512	0.0496676
								0.00113536	0.00279001	0.322358	0.000990503
								0.00379389	-0.00133848	-0.0105527	0.238208
								-0.000774846	0.136712	0.274612	-0.000966001
								0.11211	0.0757348	0.588517	0.0961907
								0.602181	0.00839855	-9.64634e-05	0.00361391
								0.00266993	-0.00250698	0.253369	-0.0144317
								0.0833466	0.0786629	0.000435624	0.00734504
								-0.0504745	0.267528	-0.000776539	-0.00225655
								0.646566	0.206262	0.104819	0.286582
								-0.00442755	0.0079183	0.307696	0.043544
								0.00373171	0.0308914	0.815004	0.00123951
								0.0810608	-0.0110436	0.00148186	0.545845
								-0.000112745	0.278315	0.000643743	0.0154724
								0.00370165	0.00347677	0.161374	0.0974127
								0.165311	2.67688e-05	0.438571	0.0301909
								0.0150085	-0.00790946	0.0105696	0.100678
								0.00694085	-0.00962141	0.318525	0.0427115
								-0.00629424	-0.0114448	0.000558208	0.123812
								0.937214	0.0101825	0.530093	0.104009
								-0.00360367	-0.00298651	0.485925	0.0428446
								0.051063	0.0112928	0.362796	0.011411
								0.208811	0.274909	0.000368123	-0.000854512
								0.000444109	-0.00177041	0.0231703	0.0561436
								-0.000991896	0.0254195	0.0305535	0.940991
								0.0594058	0.466184	0.0498424	0.0436265
								0.0536305	0.103454	0.105208	0.0235956
								0.250736	-0.0249665	-0.00118758	0.00265733
								0.00601916	-0.00450435	-0.00114697	-0.0419398
								0.104039	0.105974	-8.06927e-05	0.0321935
								0.36576	-0.00420811	0.00537945	0.239971
								-0.00104898	-0.00685542	-0.00962428	0.15413
								0.00321659	0.0103126	-0.00266265	0.104234
								0.139436	0.197487	0.0906164	0.0352904
								0.0112558	0.06156	0.0362921	0.00247829
								-0.0302459	0.0493327	0.0739581	0.149554
								0.169309	0.065282	0.162696	0.123823
								0.575949	0.000443376	0.00302996	0.0162639
								0.0275478	0.000420824	0.276329	0.024508
								0.335981	0.0488567	0.128346	-0.00721064
								0.157194	0.00200488	0.00377817	0.000425212
								-0.00112501	0.022133	0.646424	0.000310229
								-0.00487813	0.082802	0.227763	0.176636
								0.238893	0.704657	0.0295132	0.00328226
								0.141644	0.00665658	-0.00196784	0.00321898
								0.00389516	-0.0254674	0.000475064	-0.000359852
								0.00054278	0.246137	0.0983587	0.0032964
								0.0105692	0.324821	0.0191075	1.81128e-05
								0.0349516	-0.00126859	-0.0208588	0.000282906
								0.214717	0.00206655	0.000602774	0.0778375
								0.49427	-0.00423931	0.0480812	0.0685395
								-0.00442392	-0.00121436	0.587273	0.193968
								0.112381	0.000154701	0.000326694	0.0374119
								0.0102849	0.0954035	0.107808	0.00493393
								0.349559	0.000737373	-0.0150307	0.146744
								0.215663	0.209616	0.00858388	-0.0249432
								-0.0202509	0.168965	0.123444	0.412022
								-0.00885427	0.0218523	-0.00139585	-0.00163676
								0.0549005	0.00471476	0.0140328	0.0333323
								0.00538218	0.00648542	0.896305	-0.00708802
								0.0370634	-0.0780472	0.151704	0.358471
								-0.00926999	0.0118717	0.011	0.0671971
								0.469822	0.00437295	0.17767	0.161201
								-0.0591921	0.00745433	0.296148	-0.00254967
								-0.00032064	0.0766775	-0.00507916	0.639564
								0.000868709	-0.0428491	0.0184188	0.11631
								0.833499	0.013063	0.253447	0.0241462
								0.119863	-0.00164122	0.470647	0.0426586
								-0.000184197	-0.0119582	0.000188419	-0.00306238
								0.003022	-0.0364501	-0.00039428	0.149207
								0.00107363	0.0215279	0.000128768	0.00192936
								0.235733	0.0453934	0.0470778	0.147371
								0.00511674	-0.0130191	-0.0660904	0.0419884
								0.00036497	0.000341918	0.0544265	0.139833
								0.232827	-0.00172791	0.0619835	0.0450755
								0.00297864	0.263069	0.0166749	0.105716
								-0.0319213	0.0166775	0.0960678	0.0338136
								0.0149621	0.537672	0.690414	0.171416
								0.000538965	0.132797	0.289439	0.00840145
								-0.00128913	-0.0042442	0.125051	0.132001
								-0.00056933	7.87129e-05	0.0764584	0.059037
								0.000324507	0.0118532	0.157914	0.287423
								0.00937425	0.10049	0.306945	0.0934318
								0.00149829	0.00486929	0.00199836	0.152151
								0.000272974	-0.000649648	0.0659688	5.16741e-07
								0.00315917	-0.0068449	0.172915	0.420478
								-0.054657	0.0310337	0.0139903	0.162984
								0.00158092	0.0661335	0.110593	0.0981878
								0.00189155	0.0305571	-0.000112997	0.12082
								0.0091432	0.260798	-0.000791607	0.00759281
								0.0226831	-0.0014483	0.0687882	-0.00181751
								-0.00121276	0.128401	-0.0776344	-0.000541555
								-0.000648249	-0.0154507	0.00160848	0.00213131
								0.0793592	-0.000944574	0.503321	0.00799254
								0.00702548	0.284139	0.0679589	0.321111
								0.0100015	0.00285296	0.215577	0.0901761
								-0.00789226	0.00625347	0.00530789	0.176117
								0.0419428	0.0415179	0.00171947	-0.0352667
								-5.98285e-05	0.42989	0.290419	-0.0221435
								-0.00989754	0.00320334	0.264656	-0.000398146
								-0.0112714	0.346322	1.3197e-05	0.000345109
								0.0583416	-0.00386339	0.477643	0.0276475
								0.0028927	0.0719962	0.361875	0.0949752
								-0.0122104	0.00193031	0.137719	0.0731962
								-0.0426687	-0.000590826	0.00178383	0.0681667
								0.852514	0.00232871	-0.0031579	0.125124
								-0.00226649	0.0253155	4.39637e-05	0.152464
								-0.0245635	0.00592163	0.0858814	-0.00214462
								0.00972145	0.104371	0.133169	0.0465928
								0.00154617	0.00292725	0.0094146	0.0989414
								0.00515655	0.00159871	0.0771843	0.144359
								0.316202	0.477134	-0.017934	0.262496
								0.105599	0.0039679	0.206296	0.0241381
								-0.00010537	0.000453971	-0.00075196	-0.000438303
								-0.0108418	0.00522144	0.0563933	0.101344
								-0.000901521	0.136996	0.0171925	0.0220493
								0.290068	-0.0265492	0.0306089	0.0689782
								0.045775	0.00170582	0.273088	1.40545e-05
								0.00070616	0.0507335	0.00747396	0.402619
								0.00445808	0.00152439	-5.10128e-05	0.153457
								9.65996e-05	0.0115883	0.00359726	-0.0367176
								0.000595781	0.0010585	0.361222	0.248308
								0.0101763	0.0594876	0.0828175	0.0219157
								0.180978	0.0120298	0.0375191	-0.00233645
								0.0421102	0.00208365	4.58118e-05	0.0953768
								0.0470559	-0.004028	0.205628	0.795589
								0.0644565	0.127326	0.119714	-0.0042212
								0.000638622	0.00156816	-0.0365623	0.0109629
								-4.85822e-05	1.3031	0.00572206	-0.0108879
								0.0019916	-0.00315863	0.0518037	-0.00196369
								0.104577	-0.0127054	0.121344	-0.00619593
								0.114928	0.00347856	-0.00388899	-0.00229499
								-0.0347339	0.116611	-0.0297903	0.0054747
								0.10186	-0.002973	0.676034	-0.0322731
								0.00534142	0.051543	0.184842	0.0211041
								0.241273	-0.000203437	0.212447	0.292064
								0.00378096	0.00677443	0.0346107	0.197091
								0.00756074	0.00147052	0.0563208	-0.00280522
								0.123672	0.000813653	0.00310704	0.0251567
								0.151286	0.000350003	0.0500012	-0.0011424
								0.00525235	0.000650706	0.0249695	-0.0871965
								0.00442383	0.0129876	0.0023923	0.114323
								0.0421697	0.387316	0.00219773	0.143986
								0.0467232	0.000944492	-0.00137789	0.0313552
								0.156154	-0.00654721	0.119585	0.0015468
								0.0025579	0.00309977	0.09371	-0.00025884
								0.00811349	0.166616	0.00919452	-0.000126757
								-0.0650804	-0.00987859	-0.0606275	0.0579304
								-0.000136193	0.00517221	0.0496821	0.143577
								0.00639829	-0.00503732	-0.00140659	-0.000566376
								-0.00352991	0.00310112	0.00535995	-0.0166735
								0.0763727	-0.00470718	0.049896	0.00214629
								0.220164	-0.000482727	0.0026162	0.00167853
								-0.0621483	0.00649839	0.00374258	-0.0153836
								0.0171749	0.245564	0.00323791	0.00224431
								-0.0002916	0.0407018	0.000778044	0.00205207
								0.00673193	0.00186414	0.0020881	0.118927
								0.191337	-0.00203242	-0.0055347	0.0072938
								-0.0205924	0.684299	0.550985	-0.000319009
								-0.00618832	0.00457851	-0.000757084	0.0665297
								0.0198684	0.0135187	0.262289	0.162617
								0.0276067	0.0704722	0.0165175	0.018322
								0.149854	-0.0349621	0.36642	0.00388934
								0.00620135	0.15036	0.0335782	0.00537717
								-0.00281144	-0.000777951	0.00206966	0.117163
								0.0842527	0.00270611	-0.000568076	0.0293815
								-0.0273319	0.0296109	0.0879646	0.121638
								0.046846	0.00360714	0.511977	0.00964874
								0.00753404	0.0309119	0.189874	0.0266746
								0.0670336	0.00144665	0.336448	-0.00903408
								0.0306004	0.000737482	-0.00922114	0.115039
								0.151525	0.496943	0.719919	0.0233954
								-0.00304059	0.00194707	0.0234547	0.250437
								0.00513551	0.00118168	0.192527	-0.002432
								0.0045398	-0.0300056	-0.000702622	0.0987044
								0.392726	0.00156751	-0.0167588	0.539916
								-0.0105488	0.0115446	0.224466	0.0340752
								0.101051	0.0418953	0.189531	0.0902807
								-0.00606446	-0.00155635	0.235744	0.154567
								-0.0253653	0.100894	0.000508868	0.0715588
								0.00243896	0.00594298	0.699688	0.00439652
								0.00751525	0.0349506	0.0646202	0.00910074
								0.169587	-0.00927536	0.146891	0.0592723
								0.000696931	0.00132511	-0.0176133	0.0543371
								-0.000351802	0.275634	0.124981	0.151225
								0.200454	0.000183723	0.638857	-0.00839658
								0.140876	-0.00296702	0.00199837	0.0894647
								0.0582005	-0.00366908	0.312819	0.00542616
								0.0123927	0.0368946	0.185584	0.182753
								0.0334237	-0.00975065	0.0612461	0.0162412
								0.0114141	0.00351215	0.0114683	0.00867188
								-0.00097138	-0.000145134	0.197835	-0.00271267
								0.0267542	0.000786956	-0.00404254	0.0577382
								0.0415927	-0.00710612	-0.00610671	0.0908806
								0.00134391	0.00119703	0.60627	0.208027
								0.0366382	-0.00152526	-0.000288546	0.140372
								0.0374454	-0.000473387	0.0144972	-1.2981e-06
								-0.00154214	0.00219864	-0.000444207	0.205633
								-0.013301	0.000852904	0.300709	0.240841
								0.000971742	0.00296543	0.2246	-0.00263634
								-0.000203388	0.00148687	0.00138374	0.128539
								0.0414023	-0.0059045	0.00638781	0.000941641
								0.222628	0.00386326	0.000796642	-0.0122882
								-0.000189073	0.00659193	0.0958872	0.00158129
								0.000411635	0.00101247	0.122636	0.0182684
								0.00655786	0.00170266	0.112934	0.0857442
								0.174436	0.0122801	-0.00215375	0.156413
								0.063335	0.000909735	0.11925	-0.0784903
								0.000766682	-0.00084638	0.0467038	0.00132075
								0.00132168	-0.00659346	0.0160756	-0.000384335
								0.000233549	0.101178	-0.000573906	0.0297381
								-0.0567207	0.00323665	0.159602	0.00711163
								0.00193968	0.00550192	0.143798	0.00152723
								-0.000890139	-6.42128e-05	-0.000682587	-0.00139071
								0.360041	-0.000163498	0.00104145	0.021655
								-0.0168962	-0.0124272	-0.000813875	0.180043
								0.00110583	-0.00911547	0.0533186	0.071138
								-0.00639234	0.000422694	-0.00390963	0.173493
								0.233801	0.000818375	-0.000390407	0.24891
								0.00666289	-0.0022193	0.115635	0.00191699
								0.184228	-0.0114676	-0.00944402	0.432276
								0.000638776	0.691368	-0.00224743	0.314444
								0.0121141	-0.0174154	0.140868	0.176896
								0.212756	0.00176971	0.149335	-0.000899301
								0.00104147	0.00112102	0.101033	0.00563853
								0.159649	0.00612718	-0.000693844	0.00763847
								0.0165388	0.00086961	0.211337	0.00186407
								0.0261122	0.000134093	0.0676813	-0.00105214
								0.00403507	0.016887	0.302678	0.00289541
								0.170714	0.383159	-0.000761343	-0.000378575
								0.325954	0.00811401	-0.00380196	0.545674
								-0.000779088	0.0119374	0.310087	-0.0100407
								-0.00419851	0.000514243	0.147993	0.0750639
								0.26547	0.811528	-0.000106995	0.00694077
								-0.00950886	0.00391228	0.0115588	-0.0707729
								-0.0213824	0.281129	0.0191219	0.00357377
								0.00821489	-0.000401183	0.636218	0.223509
								0.0517426	-0.00279156	0.152361	0.474262
								0.0432498	-0.0031177	0.186277	-8.10775e-05
								-0.0020748	0.0350612	-0.00790878	0.109894
								-2.11027e-05	0.0567028	0.0345134	0.217554
								-0.0113554	-0.000328922	0.00714057	0.360621
								-0.0430145	-0.000444673	0.0175831	0.053626
								-0.00200089	0.0015037	0.191305	-0.00305061
								0.0015077	0.0626439	0.220068	0.0252836
								-0.00435492	0.0350046	-0.00154531	0.448003
								0.437271	0.00206206	-7.16063e-05	0.50917
								-0.0104424	0.000449914	0.371419	0.323196
								0.0497511	0.00520253	0.219839	0.0801808
								-0.00158483	0.00166181	0.0298754	0.330275
								-0.00253343	0.00198133	-0.00342016	0.00052989
								0.00857381	0.00865339	0.322449	0.125915
								-0.000706951	0.00203578	0.0013476	0.0135898
								-0.00018519	0.00634051	0.175369	0.000657034
								-0.01128	0.0308739	-0.000279328	0.438202
								0.245941	-0.00160642	0.000517425	0.103698
								0.56611	0.0061822	0.00850243	0.0257178
								-0.000372251	-0.00229919	0.602089	0.594786
								0.117995	0.00314309	0.143303	0.62389
								-0.00177464	-0.00115788	0.00860442	0.000251912
								0.00322837	2.22985e-05	0.201685	0.261606
								0.167849	-0.000667075	0.091285	0.12675
								-0.0340446	-0.00767984	0.146727	8.73627e-05
								-0.00318458	-0.000744294	0.293246	0.0230676
								-0.00210726	0.228058	-0.0103633	-0.0331967
								0.0536935	0.152117	0.488566	0.817666
								0.000228258	0.00588092	0.178528	0.0027902
								0.0475686	0.000474782	0.182543	0.0142276
								0.000192441	0.110042	-0.00171339	0.516516
								0.00108512	-0.00599746	0.116781	0.0652449
								-0.0117996	-0.000503738	-0.000146538	0.142158
								0.000199078	-0.0194571	0.844477	0.00642483
								0.000285951	-0.00214688	0.069368	0.123003
								-0.00403492	0.00155708	0.28	0.0146304
								8.42241e-05	1.15918e-05	0.0427266	0.062179
								0.000185805	-0.0176317	0.0374517	0.000827965
								0.0110402	0.012047	0.512617	0.0878563
								0.064358	0.363269	-0.000422964	-0.00497744
								0.0141031	0.0577839	0.571278	0.0365804
								-0.00360543	3.06015e-06	0.0081714	0.520377
								-0.0509325	0.010334	0.00957159	0.100059
								0.0282191	0.0859284	-0.00499842	-0.0241066
								0.00730455	0.0239249	0.133247	-0.00154587
								0.0612479	0.227252	0.0328132	1.12771
								0.000834477	0.252893	-0.0015095	-0.0815849
								-0.00487062	0.026802	0.27593	0.0360468
								0.257364	0.272537	0.0693174	-0.0091646
								-0.00491772	-0.00963273	0.183915	0.00149303
								0.0669685	0.00226099	0.00131643	0.139079
								0.00501286	-0.00500658	0.301897	0.279195
								-0.010967	-0.000882917	-0.00835277	0.00618209
								0.078244	-0.00037433	0.0041194	0.924317
								0.00658621	-0.0268493	-0.0312471	0.0160274
								-0.0282272	-0.0284359	-0.000662701	0.0833643
								0.0172072	0.703221	0.352115	0.000391839
								-1.45496e-05	0.106511	-0.00260932	0.146154
								-0.000967883	0.094381	0.0283346	0.284026
								0.133208	0.026665	0.394089	0.0243404
								0.000211436	0.00284891	0.0021437	0.00299314
								0.0333844	-0.00242813	0.000469428	-0.000709791
								0.000459685	-0.00213973	0.00298401	0.0719559
								0.219321	0.26382	0.0689304	0.416111
								-0.00645764	-0.000922202	0.341685	0.204631
								0.00619444	0.00569466	-0.004192	0.0121011
								0.0645351	0.00740822	-0.0449881	0.293874
								0.0265282	0.0522483	0.0105136	0.0982617
								0.00147341	-0.0200298	0.135961	0.000579535
								0.000608479	0.0573649	0.0108969	0.111097
								0.00734321	0.0201295	0.242676	0.103468
								-0.0799132	-0.0354371	0.0420644	0.313727
								-0.000301852	0.211592	-4.90054e-05	-0.0448322
								0.06038	0.000933192	0.487828	0.0049213
								0.00076642	0.0691299	-0.00151001	-0.0043078
								-0.0139007	-0.00688281	-0.00154057	0.0112919
								-0.0178652	0.0764466	0.136655	-0.000900264
								0.000567546	0.0824737	0.00437949	-0.0446542
								0.000527207	0.00431916	-0.00157322	0.00770337
								0.0448834	0.264528	0.0109197	0.0334194
								-0.00106754	-0.0427193	0.00124184	-0.0318172
								0.0664998	0.0868701	-6.77379e-05	0.0409398
								0.150099	0.397625	0.0114264	0.344157
								0.139371	0.138171	0.000965213	-0.00223332
								-0.00867804	-0.00051462	0.134219	-0.00695348
								-0.000225679	0.000271732	-0.00487339	-0.017141
								0.0032721	-0.00101369	0.0108053	0.00562017
								-0.00384015	-0.000461042	0.640592	0.0028906
								0.0670101	-0.013568	0.0001449	0.0182778
								0.216764	0.17159	0.166979	0.200685
								0.00619905	0.07807	-0.00200037	0.26154
								-0.000443715	0.155378	0.348373	-0.0824342
								0.223526	0.101743	0.171228	0.540435
								0.0616175	0.00355633	0.0360407	0.0806031
								-0.00934321	0.164488	-0.00198186	0.284515
								-0.000686825	-0.00925123	-0.00768077	0.394529
								0.00115461	-0.0317625	0.56665	-0.0195633
								0.0108517	-0.0168742	0.0897533	0.459224
								0.523142	0.0527239	0.0528402	0.00451461
								-0.0031532	0.685937	0.149999	-0.0261413
								0.116207	0.00591781	0.318547	0.260878
								0.000689247	-0.0010675	0.0106964	0.279951
								0.021773	0.0302129	0.0102171	0.0704218
								-0.000460893	0.00856819	0.0747734	0.1011
								0.0663903	-0.00317251	0.304204	0.193488
								0.00767577	-0.00210066	0.518543	0.000614587
								-0.0020765	-0.000487293	0.148538	0.283211
								0.00224585	0.000425294	0.0751413	0.278447
								0.0103228	0.0234145	0.0640628	0.0517612
								0.0973125	0.892496	0.223314	0.0358302
								0.0221197	0.450612	-0.00451776	0.160655
								-0.00376182	0.0274228	0.00256721	0.429891
								0.189021	0.150494	0.00134394	0.223034
								-0.0038401	0.109167	0.0270471	0.0734732
								-0.000214934	0.0544997	0.298484	0.144163
								0.301323	0.226584	0.000286688	0.117038
								0.0544805	0.000460139	0.00297066	0.0908207
								-0.00132297	0.179622	0.447625	0.0130679
								0.00174991	-0.00220742	-0.00149375	0.220307
								-0.00755961	0.108521	-0.000467817	-0.00162692
								-0.0142871	0.0338287	0.618828	0.00470112
								0.0052292	0.0613788	0.047859	0.507394
								0.00132212	0.0313204	0.0596351	0.000584991
								-0.00229015	0.0210992	0.0292036	0.240691
								0.000128827	0.0537054	0.0233648	6.30456e-05
								-0.00697731	0.311274	0.00104491	0.00752683
								0.0607748	0.0185386	0.244372	0.00415066
								-0.00572787	0.100286	-0.00655852	0.0724266
								0.119859	0.00277922	0.00272446	0.393497
								0.00325574	0.0159029	0.0459396	0.0955714
								0.0348355	0.11705	0.158213	0.0197397
								-0.0132155	-0.0389606	0.0358505	0.246152
								0.00714634	0.107346	0.00422854	0.0211715
								0.0258907	0.0490864	0.143013	-0.0492494
								-0.0012172	0.0283005	-0.000328734	0.00897666
								0.113198	0.325501	-0.00374889	-0.0188006
								-0.00110205	-0.00479215	0.0187968	-0.00679515
								0.0179832	0.0535128	-0.0141653	0.0928905
								-0.00439898	0.00193379	-0.000753084	0.0311998
								0.000788573	0.259524	0.417466	-0.00394947
								-0.0021091	0.364221	-0.0025622	0.277557
								0.00209713	-0.00481847	0.358589	0.296312
								-0.00257101	0.0664229	0.192273	0.567284
								-0.00830473	0.02147	0.0058659	0.0625507
								-0.0037931	0.0175015	0.0350135	0.0304506
								0.0378343	0.0800885	0.000363048	0.516928
								0.0280818	0.00239018	-0.000640527	0.0644324
								0.00405144	-0.00146969	0.00118209	0.166984
								-0.00791351	0.0199533	0.00726956	0.0877804
								0.0131093	0.808758	0.221513	0.0867858
								0.000903118	0.00218139	0.0753022	0.145662
								0.339468	0.026624	0.0121255	-0.068357
								0.00255217	0.000212378	0.0781447	0.00507058
								0.318832	0.1022	0.00916342	0.0266101
								0.0256509	0.164646	-0.00711619	0.00230307
								-0.00144781	0.069578	0.227572	0.076539
								-0.00210635	0.302144	0.183848	0.387031
								0.0834637	0.151748	0.0254474	0.738234
								0.014493	0.0893268	0.00973174	0.000416995
								0.140352	0.0945138	0.285883	0.260077
								0.00174448	0.0250444	0.0123576	-0.000478484
								0.0163163	-0.0158963	0.0913984	0.249537
								0.000245773	0.030108	0.0058525	0.00618592
								0.00192773	0.0881179	0.111841	0.011485
								-0.00428758	-0.00918144	0.28163	0.0547437
								0.0400489	0.0382932	-0.00447642	-0.0301113
								-0.00159855	-0.0102041	0.373181	0.00514362
								0.0026086	0.0576768	-0.000310146	-2.7206e-05
								-0.00638262	0.168953	-0.00307177	0.545446
								0.00143677	0.0893183	0.00161896	-0.0104423
								0.00072383	0.0179431	0.0706477	-0.00163961
								0.00422001	0.0987848	0.294401	0.115022
								0.0510913	-0.0106566	0.0963124	-0.0170431
								-0.023611	0.147096	0.164217	0.00136409
								0.00184004	-0.00927037	0.108305	0.236801
								0.248699	-0.0310063	0.102745	-0.00142219
								-0.000165888	0.065688	-0.0006056	-0.0015695
								-0.000661412	-0.00119601	0.123435	0.141983
								0.698244	0.000796938	0.0201301	0.0798663
								0.000683615	0.0492006	0.000296938	0.381849
								0.351185	0.00132228	0.16652	-0.00269002
								-0.00109691	0.0644531	0.0124219	-0.00420514
								-0.000949788	-0.0374366	0.0413763	0.0127686
								-8.37048e-05	0.0831088	0.0020105	0.15783
								-0.000351829	0.0250604	0.203909	-0.0027494
								-0.000597029	-0.0396342	0.123973	-0.0117732
								0.0122159	0.0149592	0.253596	0.0936575
								0.127601	0.0162468	0.0131264	0.28303
								0.347512	0.0103856	0.237248	0.00635537
								0.00193485	0.111889	0.0915968	0.185517
								0.0271692	0.0110483	0.0115185	0.240156
								-0.0044297	0.0569995	0.139273	0.00285802
								0.000479247	0.0856343	0.127839	0.164126
								0.00285213	-0.000563393	0.00189646	0.00852718
								0.0337935	0.208375	6.06033e-05	-0.0820449
								0.0957374	0.00728386	-0.00327024	0.00128947
								-0.0706096	0.0557399	0.146148	-0.0224451
								0.0113511	0.000196334	0.00095723	-0.00664813
								-0.0472041	0.00719124	0.116885	0.000734749
								-0.0042113	0.156091	0.00355117	0.0719998
								-0.00156938	-0.00129027	0.183323	0.00113738
								-0.00309802	-0.0226649	0.151329	0.0397246
								0.00321924	-0.00108511	0.000166007	0.37795
								0.00170839	0.0221506	0.666744	-0.000263719
								0.033405	-0.00868442	0.000894847	0.0301516
								-0.00110698	-0.0131877	0.0779717	0.14174
								0.00600857	0.00382466	-0.000874662	0.00325514
								0.00347008	0.0634248	0.12252	0.323992
								1.01171	0.130797	0.213789	0.00224943
								-0.000113843	-0.0372008	0.290381	0.0623479
								-0.00707181	0.00461135	0.0162682	0.0391714
								0.00615544	0.0633723	-0.00524903	0.145181
								0.117586	0.0181313	0.111871	-0.00108232
								-0.00878799	0.30957	0.160968	0.064779
								0.356996	-0.0288788	0.217787	1.40409
								-0.00168499	-0.00273126	0.177169	0.00781779
								-0.00532211	-9.43631e-05	0.469499	-0.0173527
								0.0137564	-0.00783387	0.0226934	-0.00152911
								-0.000376642	-0.000737846	0.10674	0.309866
								-0.0127837	0.0911328	0.0302811	0.0164697
								0.0463371	-0.000593613	0.00918836	0.218076
								-0.00558925	0.0984103	0.419734	-0.0307873
								-0.00553802	-0.000607636	0.0412494	0.178416
								0.0173346	0.00445005	0.00468941	0.0784394
								0.360022	-0.0021382	0.0235195	0.00549362
								-0.0437405	0.0373857	0.00230731	-0.0190038
								0.00035321	0.0145135	0.00070434	0.0696739
								0.0051775	0.00234011	0.369794	0.0177412
								-0.00342622	0.000620318	0.00410184	0.0975589
								0.328558	-0.0590999	0.161266	0.00355332
								0.100558	-0.00822027	0.00281946	0.00554508
								-0.000322995	-0.0018948	0.000549752	0.258726
								0.130879	0.00080502	0.0654742	0.151609
								0.019838	0.122082	0.114741	0.10179
								-0.00117195	0.0175254	0.255197	0.239614
								0.000350502	-0.000575993	0.252941	-0.00146844
								-0.0145914	-0.00638438	-0.00187497	0.10639
								0.00199065	-0.001424	-0.00161438	-0.0435559
								-0.0192665	-0.00476713	0.00148133	0.0254788
								0.0107175	0.000755762	0.00180652	0.141389
								0.00545331	0.465918	-0.00727155	0.224808
								-0.00582891	0.000860581	0.116268	0.00674436
								0.00212612	0.000554163	-0.0349883	0.127347
								0.219435	0.00891463	0.00821453	0.100811
								-0.00390439	0.000696729	0.555566	0.00787076
								-0.00136788	0.113991	0.0365293	0.00272107
								-0.00771605	-0.0147355	0.0813255	0.141227
								0.0998341	7.83136e-05	0.00113685	0.408729
								0.0148014	0.00191835	0.0711696	0.554347
								0.00519307	-0.0136978	0.0171256	0.0415159
								-0.0118808	0.395038	0.00316332	0.322932
								0.185509	0.000187595	0.0554573	-0.00422712
								0.0339097	0.387189	0.0362024	0.00473609
								0.00385599	0.0826527	0.2606	0.00125603
								-0.00025447	0.214006	-0.00666261	0.31789
								0.0473138	-0.00377209	0.0679028	0.0820167
								0.0709478	0.0832784	0.00384691	0.368659
								0.00471338	0.0624629	-0.0354809	0.00182057
								-0.00261502	-0.00484153	-0.00151297	-0.0148165
								-0.0023323	0.118273	-0.0340051	-0.0100086
								0.220184	-0.00382642	0.00054325	0.385591
								0.45054	0.364311	0.0219118	1.17237
								-0.00665582	0.0785816	-0.0086251	-0.0949687
								-0.0263622	-0.0107964	0.00466678	0.00587422
								0.00410958	-0.00973154	-0.00139666	0.00266512
								-0.00184241	0.00896918	0.297286	0.473329
								-0.00101052	0.926765	0.557625	0.0859496
								0.000684825	0.0113207	0.03103	-0.0025438
								-0.00502656	0.0753233	0.00294161	-0.0254327
								-0.0102116	0.000547681	0.094717	0.177864
								-0.000414026	0.0600677	-0.00762957	-0.00109384
								0.168485	0.000984068	-0.00681135	-0.00321436
								0.0549123	0.00692985	0.223755	0.00993818
								-0.00175157	0.209292	0.0159412	0.306814
								0.0116406	0.000360443	0.0831315	-0.000400871
								-0.00515617	0.2983	0.512902	-0.00486088
								0.0086011	0.174189	-0.00136533	0.188282
								0.0289806	-0.00204074	0.113008	0.0169161
								0.00791612	-0.00346339	-0.0293959	0.2483
								-0.0020143	0.00344185	0.282254	0.0977272
								0.301795	0.207651	0.183216	-0.00469228
								0.0028412	0.27139	0.0417813	-0.0205789
								-0.00244918	-0.00278268	0.00283332	-0.00110933
								0.0175124	0.0107722	-0.00281073	0.293047
								0.168679	0.0137206	0.00785471	0.0524516
								-0.000656088	0.00269854	-0.00408754	-0.0175586
								0.0518226	0.0497503	0.397538	-0.0144438
								-0.0018113	0.00603363	0.00093455	-0.018249
								0.0141712	0.0958685	0.384278	0.116295
								0.325019	0.00354693	0.713454	-0.00128766
								0.00420142	-0.00207912	0.600474	0.121221
								-0.0059192	0.0597176	0.211118	0.0118388
								0.00192065	0.0581062	0.157287	0.00188134
								0.0230965	0.000121274	0.325984	0.0514336
								-0.000529349	0.0380191	0.0366774	0.0128786
								-0.0137767	-0.00222277	0.224642	0.0771326
								0.00810758	-0.00408173	0.00221913	-0.0116402
								-0.000623883	0.0120427	0.00333231	-0.0546624
								0.00197526	0.160294	0.00334222	0.00786251
								0.409494	-0.0050881	0.00253941	-0.031656
								0.155819	0.306981	0.443541	0.0291393
								0.000632449	0.00103069	-0.000236863	0.213109
								0.0342711	0.000388367	0.811551	0.849423
								0.00177015	0.0063684	0.00348096	0.0637988
								8.89808e-05	0.00336692	0.0152728	0.162198
								0.0851426	-0.0039266	0.0461354	0.182981
								-0.00156809	0.0189702	0.0619794	-0.0706784
								-0.0023634	0.0049163	-7.8127e-05	-0.0018146
								0.00371332	0.00726269	-0.00164733	0.198439
								-0.021634	0.0140379	-0.0251451	0.756816
								0.00296639	0.0096477	0.0717845	0.180386
								0.00327435	0.0111848	0.00783943	-0.0158268
								0.0608108	-0.0112765	0.456274	0.208096
								0.00221536	0.204751	0.371452	0.537128
								0.0063221	-0.00635575	-0.00493446	0.204157
								-0.000428943	-0.00030583	0.0489843	-0.00140007
								0.0125897	-1.0812e-05	0.162817	0.0945491
								0.0281425	0.000483882	0.433973	0.0623949
								-0.00166503	0.000220073	-0.00726922	0.027963
								0.0712544	0.0695789	-0.000642049	0.0620909
								0.000739066	0.00259108	0.0622543	0.107817
								-0.00131252	0.0792795	0.120107	-0.00463749
								0.00666097	0.139793	0.16263	0.0476856
								-0.00159218	0.183546	-0.00187532	0.385191
								0.0378513	-0.00137874	9.51454e-05	0.0292045
								0.320028	-0.00689791	-0.000379543	0.0985542
								0.0236437	0.00221906	0.00435685	0.00438485
								-0.0586809	0.0533982	0.336819	-0.00121738
								-0.00621799	0.00100459	-0.003499	-0.00146953
								0.0320358	-0.0104883	0.718795	0.297672
								0.0507751	-0.00643482	0.298639	-0.000664202
								0.00717553	0.0581488	0.0857178	0.103633
								-0.0081111	0.0728633	0.373729	0.0052836
								0.00765606	0.0168395	0.0944243	-0.0156668
								-0.0155922	0.205331	0.00270165	0.197682
								-0.0119469	0.0304626	0.252046	0.000814545
								-0.00186021	0.0269199	0.241315	0.213572
								0.000584552	-0.0127825	-0.00405376	0.00675447
								0.11643	0.0824617	-0.000762311	2.59945e-05
								-0.00774811	0.244542	0.0141592	0.00412581
								0.00474157	0.0670263	0.0638872	0.288396
								-0.0752777	0.122861	0.0209753	0.0760782
								1.95495e-05	0.0184001	0.417036	0.199818
								0.0147212	0.141602	0.00560552	6.97898e-05
								0.112081	0.000969733	5.72981e-05	4.66711e-05
								0.0101491	-0.0297656	-0.00145665	0.442506
								0.0311088	-0.00477797	0.0771964	-0.000727881
								-0.00712794	-0.0420512	-0.0176167	0.00700253
								-0.00491479	-0.0209955	0.285958	0.153067
								7.0673e-05	0.0106951	-0.0207056	0.469458
								0.000841482	0.00116347	0.11745	0.141315
								0.242475	0.419561	0.415718	0.188916
								0.00359352	0.00474196	0.0321826	-0.000337718
								-0.00824724	-0.00307618	0.3518	0.0321373
								-0.0070942	0.0011849	0.192916	0.0977068
								0.00106499	-0.0109786	0.68301	0.0412663
								-0.00056524	0.00980243	0.132082	0.00225621
								-0.00203773	-0.0529465	0.148738	-0.000492328
								0.00182903	0.0161412	0.000710546	0.0673357
								0.0230042	0.0271812	8.38088e-05	0.000645558
								-0.000859242	0.113651	0.264068	0.163031
								0.00166761	0.127445	0.00533654	0.213324
								0.0219369	6.85997e-05	0.00462852	0.34364
								-0.00210759	0.213075	-0.00496983	0.208717
								0.165118	-0.000486019	0.0633968	0.231166
								-0.00454515	0.0502574	0.0165373	0.023944
								0.323669	-0.00501197	-0.000835649	0.250996
								0.00739193	0.248137	0.042775	0.0856736
								0.00162167	0.0110529	0.0147311	-0.000506947
								0.134036	0.0105518	0.124191	0.224353
								0.0323489	0.0200507	0.0315337	0.00129122
								-0.00794939	0.0173568	0.00282139	0.0332253
								0.000351937	0.0726103	-0.0187783	0.0222696
								0.0693446	0.148169	0.289424	-0.0246519
								0.012316	0.128125	0.554159	0.340966
								0.00061051	-0.035692	0.000165152	0.125297
								0.23929	0.200307	1.35201	-0.00510052
								0.0816154	0.0754722	0.440436	0.458736
								0.0314645	0.0149257	0.110818	0.919805
								0.0158459	0.0512331	0.000600259	0.0428937
								-0.0138334	0.0996915	-0.000376415	0.0722443
								0.00984216	0.00424426	-0.0050142	0.106859
								0.300429	0.0381907	0.0820282	-0.00797807
								0.0137103	0.0888874	0.00195351	0.636047
								0.000699463	-0.00190015	0.00510618	0.00205008
								0.0506491	0.0104615	0.176222	0.0596241
								0.0215907	0.00108053	0.0549644	-0.0102604
								-0.0351186	0.0870533	-0.00022491	0.00237909
								0.260812	0.00413909	0.213759	-0.00481666
								-0.000239218	-0.00407041	0.143186	0.197026
								0.00107359	0.365414	0.330354	-0.00158119
								-0.000104154	0.248269	-0.00346002	0.0597113
								0.0605792	0.0284641	0.488345	0.00955257
								-0.000347188	0.104295	0.748247	0.128848
								0.0611983	0.216493	0.000373508	0.267519
								0.176546	-0.00058841	-0.00417058	0.450594
								-0.000320219	0.0560796	-0.0153783	-0.000698962
								0.00290991	0.0219862	0.235812	-0.0135386
								0.0391266	0.0012093	0.30322	-0.00933281
								0.0186683	0.0197411	0.0468065	0.0727671
								0.129984	0.0673877	-0.073168	-0.00680408
								0.0487429	-0.0167612	0.00460869	0.0864104
								0.0176295	0.0230958	0.044845	0.0509219
								0.0311568	0.0550357	0.181317	0.0572504
								-9.47483e-05	0.0237099	0.122928	-0.0208865
								0.00210586	0.0650801	0.204758	0.00751763
								0.00940022	0.298086	0.176393	0.0675425
								0.220062	0.0533403	0.0631999	0.144488
								0.000364396	-0.0119992	0.452267	0.13335
								0.000615195	-0.00877656	0.0683156	-0.00233741
								0.00609335	0.0548574	0.232058	0.000585256
								0.276497	-0.0173701	-0.000684806	0.103045
								0.0181958	0.00127025	0.0054959	0.143643
								-0.000214234	-0.0129409	0.00266707	0.00264845
								4.18015e-05	-0.0126374	-0.00584685	0.00874487
								-0.000283676	0.544196	0.00395424	-0.012026
								0.000358685	0.128718	0.0371988	0.350896
								0.0518993	0.0333685	0.246293	-0.00202136
								-0.00968615	0.0419562	0.190433	0.122886
								0.0550317	0.241131	0.248996	-0.00373578
								0.296362	0.0019975	-0.00222265	0.387341
								0.00156713	0.606636	-0.0328673	0.0873394
								-0.00103016	0.026415	0.13189	0.327014
								0.0402792	0.739391	0.149853	3.26938e-05
								-0.000556755	0.0684714	0.458599	6.89247e-05
								0.0239217	0.00920582	-0.00167435	0.0225249
								0.0262591	-0.000682586	0.101946	-0.00131781
								0.0866759	0.00326275	0.0158429	0.0250247
								0.365975	0.0136432	0.0177958	-0.00121305
								-0.00398444	0.000765099	0.30808	0.0558371
								0.000361387	-0.00374757	0.0131038	-0.00751788
								0.00187163	0.066607	0.00480705	-0.000120134
								-0.000734726	0.00180851	0.00197724	0.00424996
								0.00172136	0.00447943	0.0063833	0.074633
								0.000366086	0.0385764	0.723053	0.201849
								0.00719517	0.230197	0.00161084	0.0239735
								0.0541215	0.120587	0.823475	-0.0207234
								0.0599543	-0.0110697	0.0559646	-0.000567073
								0.0870095	-0.00249457	0.00405606	-0.00895124
								0.00738907	0.0879559	0.00175663	0.105931
								0.00173419	0.0717731	0.0577038	0.0809221
								0.01131	0.1127	-0.00514469	0.0756059
								0.0152149	-0.00515502	0.100153	0.396637
								0.0212258	0.0914449	0.311783	0.0117653
								-0.000441211	0.0460604	0.00270609	0.184394
								0.0389497	0.331521	0.575388	-0.00138733
								6.19907e-06	0.164971	-0.0175542	0.0898719
								0.659392	-0.0406839	0.0201202	0.00150711
								0.00110258	-0.0171634	0.184131	1.04242
								0.00534283	-0.0834574	0.218031	0.0296712
								0.0289186	-0.00816089	0.160441	0.0657428
								-9.98766e-05	0.146846	0.0170814	0.0193708
								0.0009411	0.0393153	0.00411383	0.424821
								-0.00520122	-0.00241552	-0.00456286	0.0147127
								-0.0043569	0.00168946	0.00176521	0.0327424
								0.00865501	0.00112191	0.130953	-0.0305257
								-0.00227028	-0.000695232	0.555781	0.00646068
								0.000879645	0.00127822	0.13601	0.00225084
								0.000593707	0.194998	0.204234	0.524346
								0.00224201	-0.029368	0.000862283	0.0134267
								0.0232568	-0.0252588	0.355026	-0.00537287
								0.00034638	0.0159264	0.450672	-0.00712933
								0.00220317	-0.000246873	-0.000386064	0.00292058
								-0.000523631	1.04069	0.0496769	0.0270522
								-0.000859824	-0.0350739	0.00100808	0.396904
								0.00169201	0.0203174	0.0549392	0.164848
								0.000521852	0.0211573	2.03024e-05	0.228305
								0.00161881	0.00657332	0.0546574	-0.00199036
								0.194829	0.0966176	0.255596	0.00106837
								0.0790536	0.00140794	0.18566	-0.00326626
								-0.00103889	-0.00361538	0.0325127	0.0977037
								0.426527	0.000220138	0.00259866	0.0624492
								-0.00147819	-0.00600743	-0.00508968	0.00271474
								0.00436802	0.0647612	0.0207318	0.12091
								0.0161999	0.0809379	0.0799779	0.00673098
								-0.00125138	-0.0105178	0.124417	0.0187834
								0.40314	0.00220284	0.947146	0.206345
								0.00827701	0.0246258	0.0792423	0.163893
								0.000314806	0.0235983	-0.000493345	0.0135405
								0.331929	-0.011991	0.00389392	0.0321903
								0.108802	0.0294652	0.0555619	0.183655
								0.000203235	0.004588	0.00175066	-0.00384236
								0.000778251	0.213556	0.0188709	0.0155618
								0.0764053	0.00119347	0.517538	0.179118
								-0.00059323	0.00680321	0.666609	-0.00010946
								0.00062094	0.310457	0.00344889	-0.00144826
								-0.00828122	-0.0124342	0.693624	-0.00561901
								0.00522451	0.010518	0.104373	0.580724
								0.000480137	0.00389831	-0.0920839	0.0277814
								0.364177	-0.000713987	0.154901	0.00188566
								0.000206919	0.00542904	0.0128638	-0.0570478
								0.0679586	0.00149737	0.00217447	0.207342
								0.0465456	-0.0770811	0.00250406	1.0261
								0.455524	-0.00255306	-0.00644675	0.910933
								-0.000350001	0.148655	0.000401484	-0.00406486
								0.000639661	0.0257818	-0.00730322	-0.00457774
								0.156033	0.027115	0.38973	0.0916227
								-0.00616167	0.19213	0.761922	0.022034
								0.116123	0.00516977	0.0691562	0.0223882
								0.000354976	0.0148598	-0.0106808	0.0932379
								0.0072972	0.0946546	-0.00198483	0.0521597
								0.0022002	0.148294	0.00127093	0.0529524
								0.0208164	0.00680406	-8.18332e-05	-0.0104751
								0.159963	0.00192865	-0.000401322	0.095757
								-0.000149719	-0.0162863	0.0715433	0.0159353
								0.156986	0.253767	0.0269588	-0.00887955
								0.0039626	0.00114376	0.11857	0.368599
								0.00339321	0.0231323	-0.0315432	0.0996522
								0.165304	0.000398739	0.108108	0.0189112
								0.000640893	0.00440001	-0.0351325	1.29976
								0.0310516	0.0145672	0.00112314	0.0487812
								-0.0304105	0.00150698	0.0182579	-0.000174105
								0.121731	0.0197648	-0.000257735	-4.42148e-05
								-0.0244566	0.00279286	0.162503	0.000593527
								0.133235	0.146455	0.0948828	-0.00463758
								-0.000287794	0.465454	-0.0023218	-0.000727834
								0.0510996	0.0036072	0.0202476	0.14913
								0.377911	0.000163714	-0.00342649	0.0613466
								0.00395445	0.106061	0.00236556	0.0933827
								0.0448115	0.0272775	0.00107615	0.0445362
								0.0388206	0.0195422	0.339082	0.000795476
								0.748527	0.00167361	0.484623	0.0696635
								0.000851547	-0.00302055	0.339994	0.0123046
								0.444117	0.00108002	-0.0325409	0.204625
								0.0824887	0.00462891	0.0622952	-0.0277467
								0.111959	-0.00012586	0.00171015	0.438703
								0.00129882	0.0055899	0.230083	0.00211352
								0.00141602	0.157826	0.189085	0.0122789
								0.04926	0.0212278	-4.12556e-05	0.231884
								0.0690297	0.0858176	0.0669821	0.000626532
								0.281684	-0.0638941	0.0961584	0.140708
								0.0953384	0.12893	0.419786	0.606217
								0.00376786	-0.0583144	0.00160492	0.00376935
								0.0457698	-0.0028318	-0.0130307	0.00125892
								0.0355922	0.00251222	0.118235	-0.000417243
								0.194653	0.11988	-0.0392295	0.00883267
								0.0532641	0.0433731	0.0331511	0.00115384
								0.000711389	-0.00164701	-0.0116688	0.147342
								0.00230084	0.00911485	0.00807723	0.0331588
								0.0567485	0.0974587	0.0103749	0.269695
								-0.0299417	0.00751848	0.0369483	0.0891389
								0.816853	0.200383	-0.000531325	0.00268986
								0.119779	0.211378	0.00034019	-0.00618749
								0.000880485	0.0364159	0.00124779	-0.00521773
								0.111396	0.00848816	0.0898037	-0.00396438
								0.0954599	0.400819	0.279843	0.00206002
								0.0002411	0.702745	0.00364908	0.00239027
								0.0930341	-0.000458556	0.0332113	0.0452529
								-4.45363e-05	0.0949563	1.37786	0.00496368
								0.0293383	7.58341e-05	-0.00274563	0.00112413
								-0.00194319	0.0483736	0.121995	0.180093
								0.0257018	0.000929037	0.0238628	0.549687
								-0.0119625	0.00579152	0.0017186	0.00755616
								0.00153909	0.225996	0.0751278	0.172993
								0.210215	0.0214265	0.04175	1.15743
								0.00281103	0.0387527	0.000400736	0.147397
								-0.00585657	0.000707071	0.454092	0.0105117
								0.000328431	-0.0108189	0.0517746	0.0143735
								0.17219	0.0518937	-0.00020747	0.611525
								0.13637	0.0107918	-0.0163704	0.00226957
								0.262272	0.192813	0.0104219	0.113098
								0.000309899	0.00635533	-0.0196899	0.00896011
								0.00362526	0.447426	0.0112141	0.0483564
								-0.0323114	0.0607673	-0.00525463	0.0457164
								0.0745926	-0.0532655	0.139725	0.00296402
								0.0765521	0.240514	-0.0223597	0.0260878
								0.000246382	0.362217	-0.0029155	0.0496528
								-0.0132712	0.00165273	0.00205504	0.1474
								0.000110954	-0.00216663	-0.0186113	0.180321
								0.0338184	-0.0110892	0.0371192	0.0159685
								0.0177098	0.10824	-0.0110609	0.0692683
								3.76451e-05	0.071632	0.000542226	0.177814
								0.00849747	0.00108352	0.0985478	0.00153097
								0.276451	0.048485	0.353303	-0.0325155
								-0.000177703	0.00233745	0.00845271	-0.00295333
								0.0449583	0.0890433	0.00261791	0.0101413
								0.14645	1.00877	0.00463934	0.027389
								-0.000520483	0.00187187	0.0229387	-0.060175
								0.123887	0.495724	0.0446925	0.305639
								0.0502378	0.000216863	0.476487	0.0376877
								0.147716	0.00037425	-0.00379986	0.281046
								0.106271	-0.000151525	-0.000528284	0.378578
								0.0101332	0.0884382	0.0176736	-0.00307278
								0.0091838	0.048535	-0.000916294	0.222175
								0.0712403	0.0558219	-0.00136779	-0.0393816
								0.0420258	-0.00249531	0.0100469	0.211712
								0.0449255	0.0223981	-0.000138155	0.0078114
								2.50474e-05	-0.00139317	0.313319	0.147931
								0.0131051	0.0126608	0.128472	0.463344
								0.000874317	0.0208286	0.00319743	0.481365
								0.0446245	0.00259541	0.00693063	0.00115591
								0.136619	0.0183241	0.0654778	0.346365
								0.028041	0.0391007	0.0871574	-0.0053372
								0.00153379	-0.00207903	0.0364433	0.0740316
								0.0904873	0.000116047	-0.000946911	0.0933846
								0.00208567	0.173551	0.0963687	-0.000962582
								0.0160046	0.105084	0.418395	0.00137605
								0.0169593	0.00795108	-0.0123526	8.30334e-05
								0.0782734	0.00653422	-0.00379444	0.0579457
								0.180887	-0.00216037	0.517212	0.0365206
								-0.000532643	8.26604e-05	0.118035	0.0172214
								0.129111	0.0349954	0.0258957	-0.0229103
								0.0709083	0.279728	-0.00340569	-0.00677179
								0.19928	0.255717	0.00108238	0.000139614
								0.0512119	0.308468	0.0192433	-0.00291573
								0.143224	0.0012692	0.00107461	0.123921
								0.27941	0.43172	0.0286332	-0.000126594
								0.473543	0.00789371	0.0149943	0.0268884
								-0.00962924	0.0160427	0.0157681	0.00107856
								0.162454	-0.0266899	0.00348331	0.0391756
								0.122687	0.407269	0.000431587	0.338886
								0.834735	0.0138651	0.0969225	0.423697
								0.17699	0.0233325	0.168144	-0.00564315
								0.121318	0.0838784	0.0732865	0.683237
								0.302693	0.00532208	-0.00595366	0.548984
								0.312842	0.0452509	-0.00316726	0.208105
								0.0092645	-0.00208267	0.144498	0.10021
								0.0378516	0.21555	0.182001	0.00393722
								-0.0131897	0.00218169	0.116698	-0.000311052
								0.0228945	0.00133381	0.0774114	0.000683271
								-0.00507721	0.0343614	2.18409e-05	0.00244244
								0.0995078	0.0213545	0.00116073	-0.0428233
								-0.00059927	0.00738143	-0.0260759	0.0631236
								-0.00228125	0.162865	0.830846	0.0685582
								0.224346	-0.00554077	0.207883	0.213811
								-0.0331508	-0.0172708	0.0219547	0.127103
								0.212529	0.00662692	0.0165856	0.106584
								0.0275658	0.00044037	0.0196707	-0.00110408
								0.0786498	-0.0695935	0.239738	0.34436
								0.00457385	0.00229891	0.113118	0.0520463
								-0.0172226	0.000639946	0.00407594	0.566844
								-2.1679e-05	0.00196259	0.238594	0.33655
								-0.000152129	-0.000993361	0.100974	0.0270598
								-0.000304897	0.00305753	0.140828	0.266833
								6.17628e-05	0.0788777	0.00104137	-0.0579788
								-0.00277566	-0.00366748	-0.0054377	-0.00892853
								0.000157629	-0.00302877	0.065384	0.0636187
								-0.00240413	0.0764393	0.145419	0.00454268
								0.0388253	-0.00529652	-0.00219352	-0.00258335
								0.117357	0.0276057	0.100648	0.0287101
								-0.00190456	0.00165707	0.033911	0.0257644
								-0.000526196	0.0026394	0.534612	-0.0033997
								0.120272	0.0155334	0.0342684	0.00454776
								0.0663033	0.0848842	0.147198	0.205213
								-7.17239e-05	0.00542461	0.0154555	-0.00981861
								0.0724038	0.0151727	-0.0040504	-0.0030909
								0.0790546	0.0015975	0.0703405	-0.00356255
								0.0177747	-0.00810334	0.327774	0.006666
								-0.00766384	-0.0066932	0.0574418	-0.00133766
								0.0727451	0.0989061	0.523655	0.122972
								0.0418658	0.196536	0.00590861	0.00641585
								0.000618606	0.0127444	0.000430286	0.228942
								0.061291	-0.0552799	0.0700288	0.0854343
								-0.0068472	0.0237738	0.00227681	0.209389
								0.0582474	0.16341	0.204811	0.000689485
								-0.0012679	0.149242	-0.00172222	-0.00415856
								-0.00677812	-0.0655064	0.052767	0.00202204
								0.207107	-0.00270931	0.00683236	0.000824691
								0.000116744	0.260798	0.248575	0.389681
								0.464465	-0.00441876	0.0642464	0.470032
								0.0436894	0.177028	0.00878769	0.128827
								0.00785371	-0.000215983	-0.00272969	0.135635
								0.274847	0.108692	0.182164	0.187588
								0.000488533	-0.00144809	0.140243	0.00152607
								0.119764	0.0438529	0.00172324	0.032945
								0.00971807	0.0109621	0.323221	0.264308
								0.000372855	0.00233269	-0.00242257	0.00012546
								0.13691	0.0296908	0.00909217	-0.00699384
								-0.000430116	0.00163717	0.000476097	0.0139625
								0.336984	0.043517	0.241136	0.00805694
								0.0056715	-0.00342998	0.130657	0.0180722
								5.81398e-05	0.00138451	-0.0121715	0.00935737
								0.0890633	0.16449	0.00796028	0.333606
								0.000742484	0.0034462	0.0395981	0.030925
								0.0626134	-0.00291152	-0.0743442	-0.0145489
								0.00150166	0.00314226	0.0622177	0.00733718
								0.000456491	0.126155	0.0895758	0.27246
								-0.0266848	-0.000395848	0.632425	-0.00463252
								-0.000775841	0.0123834	0.019488	0.0035164
								0.060572	0.0165434	-0.00246897	0.24283
								0.00398811	-0.00151746	0.224036	-0.00368614
								0.00768424	0.000879602	-0.0291624	0.00210949
								-0.00303769	-0.0183758	0.309669	0.0455042
								0.00844553	-0.000483664	0.00160375	0.00118232
								0.180714	0.191462	0.048742	-0.000806791
								0.46324	0.00592661	0.638134	0.0120425
								0.00127985	0.0432905	0.0394972	0.189149
								1.08872	-9.66738e-05	0.13181	-0.00613193
								0.0410714	-0.00540833	0.0216684	0.0381798
								0.0492727	0.0229059	0.0642167	0.0522408
								-2.41253e-05	0.00591896	0.843736	0.00198412
								0.0205717	-0.00283934	0.000386402	0.0684046
								0.000181703	0.190563	0.260479	0.0125886
								-0.00848071	-6.22118e-07	0.0887327	-0.000839209
								0.127121	0.167036	0.00637649	0.195944
								0.426486	0.0322612	0.00569446	-0.00240567
								0.00127608	0.00197468	0.302697	0.000642097
								0.217851	0.12328	0.00226009	0.283177
								0.000794013	0.177052	0.153915	-0.000109578
								0.248638	0.141472	0.201237	0.0635461
								0.0145236	0.226091	-0.00157488	0.00506145
								-0.0133867	0.00570224	-0.000199537	-0.00143156
								-0.0383842	0.068882	0.00359722	-0.00363547
								-0.000741393	-0.00744033	0.002172	0.0177722
								0.0296303	-0.0291905	0.375938	0.118142
								-0.00996491	0.0163424	0.00173166	-0.000891713
								-0.00629387	0.00328898	0.491744	0.052438
								-0.000348048	0.0403471	0.0105623	0.012473
								0.112565	-0.00128044	0.0692159	-0.0015661
								-0.00378246	0.0130882	-0.000239339	-0.00371965
								0.052984	-0.000377888	0.0944753	0.0112312
								0.104681	-0.000517635	0.250471	0.0859209
								-0.00225136	0.0675788	0.183908	-0.0304923
								0.286678	0.00094525	0.479675	0.00984632
								0.0015967	0.29465	0.0291098	0.130315
								0.369238	-0.00229116	0.000977782	0.0192906
								-0.000513742	0.000584903	0.126986	0.27688
								-0.00522239	-0.0574283	-0.030583	0.36107
								0.0776961	0.00973035	0.109541	0.151986
								0.0317998	0.00162895	0.364636	0.142509
								0.0888491	-0.00135577	0.0301204	-0.028414
								0.000927685	-0.00195041	-0.00973252	0.199742
								0.0568022	-0.00144283	0.175418	0.0756944
								0.00338572	0.00152076	0.0382217	0.00899046
								0.059512	0.0058539	0.000334265	0.555876
								0.0106582	0.00299916	0.403852	-0.000358262
								0.0126998	-0.000307119	0.002079	-0.0121483
								0.302412	-0.0011721	0.526791	0.110885
								6.0738e-08	0.00158444	0.158385	0.0795994
								0.241911	-0.00267256	0.204218	0.0259062
								0.119991	0.0900244	0.0786347	0.000848061
								0.0262677	0.00109861	0.0226255	0.0135314
								0.0869928	0.00628173	0.234493	0.00925843
								-0.00260735	0.205445	0.343653	0.188855
								0.00336724	0.0156028	0.00728921	0.0176918
								0.0708948	0.00139727	-0.00219854	-0.000933382
								-0.00234571	0.000173543	0.027822	0.379283
								-0.0229815	0.00121251	0.0260328	0.00282638
								-0.00786207	0.00158925	0.0391501	0.215406
								-0.0263586	0.0212726	0.0474218	0.000187984
								-0.00176963	0.000950171	0.114686	0.121365
								-0.0021537	0.000170998	0.147197	-0.0283586
								0.0629015	0.193311	0.0943764	0.336641
								0.398901	0.0400821	0.241769	0.064204
								0.523835	0.100532	-0.00230267	0.00556753
								0.000305347	0.00161974	0.00389697	0.0688127
								0.0708569	0.111927	0.0437697	0.0261733
								0.00465223	0.00421591	-0.00511099	0.427458
								-0.000218179	0.000793752	0.00155149	0.27888
								0.543707	0.00057079	0.00939447	0.233254
								0.0633859	0.0387651	0.13358	-0.000596352
								-0.0148296	0.0100564	0.0532672	0.0386791
								0.00118019	0.016489	0.225234	0.547173
								-0.00253199	-0.000100032	0.0806737	0.0202481
								-0.00065973	0.0572765	0.180817	0.307157
								0.000817698	-0.000999815	0.023462	0.0539451
								0.000685706	0.142923	-0.00119954	0.0530605
								0.0271683	0.753812	0.000762092	0.031609
								0.00247401	-0.0021235	-0.0236764	0.0929148
								-0.000315749	0.0954342	0.542291	0.0456973
								0.150276	0.205636	0.000160329	0.136408
								0.0205016	0.31389	0.648224	-0.00416335
								0.047983	0.0100922	-0.00146495	0.314376
								0.000114442	0.0296192	0.000231321	0.0525511
								-0.000260985	0.000537203	0.0226581	0.0310799
								0.00472438	0.0928998	0.249856	0.0830223
								-8.28817e-05	-0.00547722	0.00839322	-0.00171225
								0.0275971	0.187572	0.0683801	0.443855
								-0.000955158	0.0696319	0.0130165	0.0323181
								0.0126186	0.0694907	0.0060102	-0.0148248
								0.361046	0.00103082	0.215584	-0.00124101
								0.0374315	0.0376852	0.169633	0.00310541
								0.335828	-5.00816e-05	-0.00558338	0.0705032
								0.129255	-0.00229073	0.102509	0.244947
								-0.000315481	0.107439	-0.012201	0.0528968
								-0.00366795	0.00261991	-0.00389874	-0.00647865
								0.0839479	0.00289443	-0.000595838	0.00277981
								0.000398303	-0.0023774	-0.018321	0.091779
								0.00127881	0.0258379	0.125088	0.0219721
								0.470378	0.132531	0.223452	0.215377
								0.00729131	-0.00186361	0.00101679	0.00806631
								0.0585686	0.00144099	0.176868	0.124939
								-0.000697488	0.00397356	0.0365296	0.0856923
								-5.13058e-05	0.00309582	0.214658	0.00263459
								-0.000292481	0.0961031	0.00238927	-0.0133505
								0.00121259	0.000320841	0.0909849	0.140934
								0.00135868	0.0687447	0.212472	0.216832
								0.246116	0.000615818	0.314194	0.0864075
								-0.000787881	0.0623062	0.118989	0.0334467
								0.000833475	0.0892839	0.0313053	-0.00519187
								0.0643945	-0.000131229	-0.0042501	0.280108
								0.000374652	0.364376	0.0257549	-0.0129355
								-0.00240217	-0.00219985	0.145172	0.427261
								0.00357299	0.0604628	-0.00101364	0.376747
								0.0681692	0.106162	0.0804323	-0.0161383
								0.00720504	-0.000714525	0.0063153	0.00054475
								0.0426119	-0.00566034	0.39292	0.0544435
								0.00116569	0.0518707	0.000217537	0.208058
								0.0673365	0.0628778	0.000573385	-0.0136548
								0.00742845	0.030923	0.000486002	0.0285796
								0.000588248	0.128029	0.00158773	0.116062
								-0.00254705	-0.0107506	-0.0113744	0.242224
								-0.000481892	0.11391	0.0222637	0.0711433
								0.00189664	-0.0103447	-0.0390884	0.159136
								-0.000436499	-0.00283739	0.361276	-0.00792092
								0.00332148	0.150512	-0.00162705	0.00159707
								0.171566	0.0011076	0.0492741	-0.000651526
								0.00121982	0.00212998	0.178417	0.208341
								-0.000201571	-0.00958272	0.300939	-0.00562542
								-0.00436621	-0.0483854	0.00105021	0.339359
								0.0463588	-0.000117242	0.085102	-0.00464799
								0.286615	0.00156789	0.000510844	0.0387704
								-0.0028116	0.099746	0.000136258	0.568906
								0.000855217	0.213178	0.0237578	-1.78999e-05
								0.00118245	0.00652886	0.0129065	0.00115139
								0.303233	0.000223916	-0.00300266	0.118057
								0.0279349	0.111621	-0.00772515	0.121907
								0.0421797	0.00205	-0.00845099	0.0380174
								0.285257	0.000170273	-0.00355576	2.13049e-05
								0.00256705	0.0054144	0.576246	-0.0133289
								0.0916694	0.0373793	0.210153	0.0222515
								0.00121477	-0.000114212	0.0962036	-0.00173217
								-0.00339329	-0.0533098	0.00313564	0.0313378
								0.0927767	0.00214745	0.338027	0.13744
								-0.00191361	0.000211629	0.0899918	-0.00841592
								0.00033706	0.00641403	0.000148127	0.263092
								1.97088e-05	0.0752783	-0.00129601	-0.00173711
								0.267	-0.000248347	-0.00377107	0.215303
								0.00824002	0.0373321	0.0314391	0.10586
								0.00257107	0.0222251	0.00591274	0.0969136
								0.0855924	0.0201596	0.00820333	0.38678
								0.10094	0.0328569	0.00285932	0.011129
								0.00541562	0.0753823	0.030057	0.575045
								0.160269	-0.0477314	0.0197435	0.00257252
								-0.0289041	-0.000443534	-0.00223686	0.454638
								0.00228592	0.000685008	-0.0933947	0.241506
								0.226559	0.224813	-0.00196739	0.00238071
								0.142801	0.108425	0.0069483	0.22988
								0.202808	-0.00224075	0.00278827	0.209531
								-0.00278683	0.0675184	0.0835621	0.0474657
								0.099753	0.0178645	0.0175259	0.0281878
								0.281127	0.0648926	0.0997365	0.0432482
								0.284626	0.0341986	0.00603842	0.053063
								0.179138	-0.0007394	0.00480155	0.208593
								0.00433857	0.202021	-0.00995636	0.106762
								0.200587	-0.00384665	-0.00121067	0.00632501
								0.161526	-0.00137065	0.0314171	-0.00071956
								0.0933336	-0.00350465	0.151556	-0.00899397
								-0.00258834	0.0509686	0.00114194	-0.00887176
								0.032718	-0.000261106	0.0985124	0.12173
								0.000132088	0.0447683	-0.000677104	0.996705
								1.7126	-0.00104097	0.0610434	0.0197527
								-0.00159048	0.0119374	0.0169134	0.308303
								0.0300353	-0.00155846	0.585318	0.0155201
								0.106296	0.0284909	0.011066	0.00422436
								0.080959	0.0156787	-0.000692791	0.251167
								0.103659	0.417549	-0.000465565	-0.00645919
								-0.000391941	0.573588	-0.0836055	0.00011872
								0.564368	-0.020499	0.146131	-0.000155269
								0.0826674	0.0939866	0.000932092	0.00119871
								0.328693	-0.00182567	-0.0142617	-0.00293243
								1.04485	0.00101139	0.0138219	-0.0110795
								0.0235942	-0.00114135	-0.00133853	0.214027
								0.144178	0.241642	-0.00392486	0.00512328
								0.378528	-0.00359173	0.14729	0.0313274
								0.00224941	0.106206	0.00532057	0.205362
								-0.0382707	0.000708871	0.0249524	0.182525
								-0.00533404	0.214277	0.0255266	0.0669254
								0.182409	0.000124404	0.00178164	0.312824
								0.290059	0.000951567	0.277378	-0.0110057
								0.265109	0.0055134	0.109246	-0.00239789
								0.191111	0.000279884	-0.00272961	0.0118863
								0.00708601	-0.000298287	-0.0256695	0.000480104
								0.000211064	0.00787187	0.222284	0.16276
								-0.0105164	0.00066225	0.139708	0.0578677
								0.00144272	-0.00420019	0.0359747	-0.00275661
								0.433602	-0.00131349	-0.00380624	0.61301
								9.83588e-05	0.0041544	0.000234016	0.0599873
								-0.00470642	-0.00847309	-0.00312683	0.0835391
								0.0337709	-0.00375021	0.00423021	-0.00289692
								0.0410435	-0.00206009	0.157758	0.0334059
								0.00111988	0.0143091	0.0275693	-0.000510239
								0.0189572	0.175334	0.510489	-0.00593876
								0.00327398	-0.000557222	0.0026368	-0.0163114
								0.485552	0.00685102	0.320708	0.225625
								0.015097	-5.55754e-05	0.0121148	0.0884054
								0.600579	0.344875	0.174624	0.00651275
								0.245269	0.0179368	0.0522683	0.00204838
								0.046701	0.153096	0.134693	-0.0026872
								-0.00120847	-0.000553348	0.065055	0.054439
								0.144591	0.00918771	-0.0100332	0.000332006
								0.488558	0.112035	0.160721	0.171817
								0.0974309	0.0156992	-0.00352095	-0.00374044
								0.00447073	0.000179439	0.0643708	0.501004
								-0.00416145	-0.00368767	0.108604	0.263
								0.0251885	0.00356277	-0.00166162	-0.00104022
								-0.010655	0.00636152	0.179366	-0.000971289
								-0.00156012	0.1208	-0.00188889	0.00665173
								0.204224	0.000372471	0.0110359	-0.000585036
								-0.00182976	0.0331962	0.142934	0.100177
								0.0449908	0.00125657	0.0679165	0.00614494
								0.260384	0.00812257	0.00164752	0.00793344
								0.199906	-0.0306327	0.00136808	0.269539
								0.00270491	0.0427449	0.00532406	0.353901
								-0.0102299	-0.0144533	0.0106037	0.276374
								0.000900106	-3.94013e-05	0.00347741	0.00574588
								0.0595864	-0.0363938	-0.000492654	0.224498
								0.0745245	0.00241297	0.0244064	-0.00164827
								0.0795298	-0.00142288	0.0360146	0.0516859
								0.103547	0.0028343	0.0346002	0.0380342
								-0.0028788	-0.000928505	0.0824522	-0.00503633
								8.7161e-05	-0.00663556	0.00243715	-0.00790872
								0.00490133	-0.00050608	0.000229262	0.00152904
								-0.0187681	-0.00247883	0.0162209	0.137772
								7.17493e-05	0.0354903	-0.00157864	-0.000528896
								6.85172e-05	0.00254489	-0.0126596	0.0112491
								0.000866984	0.132425	0.0931889	0.171878
								0.0255877	0.00017209	0.00461372	-0.0030172
								0.216631	0.0995266	0.0235896	-0.0356691
								-0.00123415	0.24636	0.0294552	-0.0842116
								0.013859	0.00756015	-0.000952035	0.0497169
								0.000266325	0.00134318	0.0351758	0.00841581
								0.00144667	-0.00401889	-0.00098096	-0.00266933
								0.000579928	0.0038146	0.00755719	0.227821
								0.0831843	0.0044623	0.0299323	0.00260449
								-0.000749654	0.0544371	-0.00176485	0.0993571
								0.103641	-0.00271477	-0.000977605	-0.00341242
								0.000150075	-0.002128	0.131034	0.00938353
								0.0976675	0.0235773	0.0374341	0.591111
								0.00334573	5.05719e-05	-0.000487495	0.475124
								-0.00184428	-0.01001	0.000148982	-0.0246407
								0.373077	0.0583244	0.210308	0.647771
								0.000431055	0.00037192	0.240776	0.0624885
								0.00209323	0.0712808	0.0105934	0.388992
								0.000565389	0.00148844	-0.0162527	0.00978922
								0.0441832	0.00425537	-0.0134123	-0.00689317
								-0.00102268	0.000443802	-0.0502389	0.0486686
								0.069665	-0.0035129	0.0650203	0.198254
								0.00348287	-2.08214e-05	-0.00502141	-0.0248943
								-0.00183492	0.0018092	0.337903	0.00138247
								-0.000655991	0.00956126	0.0101294	0.0191533
								0.118012	0.0137771	0.417587	0.176388
								0.00574605	8.193e-05	-0.00377006	-0.0461268
								-0.000341998	0.000567943	0.0226559	-0.00061298
								-0.0352397	0.009272	-0.0138216	-0.00410543
								-0.000468997	0.000550056	0.00289084	0.0917297
								-0.000500031	0.394057	0.0028067	0.141694
								-0.00198884	0.000505028	-0.0172139	0.00108584
								0.0557637	0.000395561	0.00755373	0.0829008
								-0.000409427	0.043428	-0.00500623	-0.0374026
								0.0635427	0.0042412	0.0207573	0.00113172
								0.153406	0.000105875	0.0696429	-0.00308239
								-0.001038	0.00279936	0.0441287	0.0192874
								0.111362	-0.00178769	-0.000588457	0.00983201
								0.00482603	0.0010432	0.00988307	0.3168
								0.0879385	0.0143904	0.000502667	0.169973
								0.24235	-0.000896875	0.00544874	0.296044
								0.0493717	-0.0198455	0.0129693	0.181078
								0.000390493	0.0803131	0.00822191	0.490796
								0.0528295	0.00578855	0.0381325	0.144544
								6.77602e-05	0.188471	0.0746295	0.000383244
								0.0209732	0.0813162	0.143433	-0.000121009
								0.00012583	0.000279869	0.21773	0.00531748
								0.0199193	-0.000372402	0.00633555	-0.00319129
								0.0623313	0.168373	-0.0193094	0.421794
								0.0110922	0.367499	0.00366186	0.0129449
								0.0178088	0.149175	0.00830695	0.0948633
								0.118656	0.000255647	0.0519565	-0.0553092
								0.000231745	0.000924787	0.0335061	0.340438
								0.0115384	0.0441824	0.000163916	0.00881804
								-7.27989e-05	0.445409	-0.00315304	-0.000108154
								0.00440344	0.000397334	0.000425617	0.0540786
								-0.00102417	0.422032	0.0257378	0.0193221
								0.00125852	0.00446121	-0.00138568	0.0989355
								0.00484129	0.0645863	0.000707707	0.030784
								0.0248137	-0.0032265	0.0627192	0.220253
								0.000505297	-0.0193859	0.244695	-0.0232993
								-0.067385	0.000754141	0.289321	0.167108
								-0.00195858	0.123876	0.0329268	0.0519177
								0.000784514	-0.000105865	0.00243427	0.0615588
								0.000379438	0.000560337	0.00994463	0.300059
								0.0833764	-0.0524227	-0.00672528	0.0237047
								-0.000850819	-0.0123034	0.000899591	0.0102445
								0.288977	-0.0453919	-0.0154817	0.00278194
								0.210884	-0.000457586	0.00315452	0.00547153
								0.016595	0.219918	0.00472734	0.00428086
								0.0753645	0.000918272	0.000160079	0.000628047
								0.0893895	0.000566081	-0.00292025	0.223594
								0.112742	0.00302293	0.0022575	0.00320005
								0.171373	-0.00453298	0.0275145	-0.000278818
								-0.00181045	-0.00119754	0.0512352	0.0647117
								0.0971335	0.029391	0.00109148	-0.00365079
								-0.00109341	0.00262559	0.000898659	0.00706756
								0.020482	0.00995755	0.00449833	0.0128941
								0.129948	0.504032	0.0159417	0.024612
								0.00144525	0.00722934	0.400106	0.213774
								0.283917	0.214665	0.0110032	-0.00240845
								0.291044	6.27645e-05	0.00142004	-0.00310276
								0.0961351	-0.000546281	0.101048	0.00196369
								0.261112	0.000955407	-0.000771169	0.120039
								0.000596897	0.000313344	0.0253072	0.0105603
								0.0690007	0.321743	-0.000883509	0.112294
								0.0135896	0.0233102	0.176839	0.0280144
								-0.0398036	0.00101316	0.064571	0.232592
								-0.00477223	0.0200922	0.00284921	0.109089
								-0.00943393	0.00205664	-0.0368452	0.0619806
								0.00351684	0.0197444	0.0158701	0.359438
								0.0419944	0.0053898	0.177783	-0.00806646
								0.00791056	0.000368108	0.00503373	0.385588
								-0.00426433	0.0201002	0.0638973	0.000541513
								0.0241662	-0.000139319	0.0939906	0.0256879
								0.00124259	0.00292051	0.403463	0.0202139
								-0.000505005	0.287649	-0.00222236	0.000719866
								0.198301	0.241433	-0.0107531	0.496426
								0.00936923	0.00903555	-0.00247693	0.00823649
								0.253257	0.207451	0.273141	-0.0024142
								1.1712e-05	0.000639946	0.0202226	0.366019
								0.000901666	0.00610207	0.00319024	0.0171462
								-3.69103e-06	0.000227031	-0.0047261	0.0171183
								0.100107	0.448843	0.0582704	-0.00156167
								0.111703	-0.00348175	0.00969988	0.427509
								3.58414e-05	-0.0392124	-0.0017526	0.589354
								-0.00339762	0.0678929	0.00106025	0.0471744
								-0.00626793	0.0984143	0.351263	0.024597
								0.00387131	0.0135553	0.535675	0.0880022
								0.0116344	-0.00216422	0.0877261	0.00456648
								0.00446659	-0.0179748	0.0110924	0.178219
								0.00058884	0.0391213	0.00217181	0.00660942
								0.0427933	0.129697	0.00242344	-0.0511552
								0.020027	-0.0119523	0.0523091	0.162792
								-0.00179555	0.00311286	-0.00350871	0.126254
								0.00509222	0.0339597	0.535929	0.00188035
								-0.00119148	-0.00430904	0.0385563	0.681726
								0.0056559	0.000662577	-0.0110697	0.151478
								-9.31737e-05	0.156611	0.000609821	0.155379
								0.0255947	0.108306	0.511496	0.00314006
								0.126775	0.00212045	0.000197683	0.0943588
								0.169199	0.0195575	0.298143	-0.0129072
								0.00214925	0.26576	0.0297969	-0.000919908
								0.0946769	0.00693624	0.0339169	0.0176194
								0.00087933	-0.0226394	-0.000191077	-0.000258471
								0.00428236	-0.00604785	0.00138811	0.0562368
								-0.000231023	0.00317934	0.000594974	0.0356521
								0.000604908	0.0508378	0.185737	0.0499086
								0.0327514	-0.00193278	0.0690495	0.351606
								-0.000804365	-0.00112555	0.00336622	0.543775
								0.00039904	0.161705	0.0150413	0.11422
								0.139987	0.000137543	0.00342969	0.104353
								-0.00140427	-0.00200882	-0.00164226	0.000553411
								-0.0267129	0.0034046	0.107229	0.012811
								0.130762	0.0995548	-0.0303619	0.0401597
								-0.000466802	-0.00269125	-0.000749156	0.000511367
								0.00612675	-0.0162606	-0.0233506	0.035766
								-0.0597065	-0.000427383	-0.0151606	0.0224371
								0.0114028	0.00242733	0.091681	0.123876
								0.0912516	0.240551	0.0526642	0.0134276
[truncated: 150,903 more rows]
