# Supplementary material for: Discrete spatial organization of TGFβ receptors couples receptor multimerization and signaling to cellular tension
Source: eLife. 2015 Dec 10;4:e09300. doi: 10.7554/eLife.09300 (PMC4728123; doi:10.7554/eLife.09300)
Supplement: Figure 6—source data 1. — DOI: http://dx.doi.org/10.7554/eLife.09300.014 [file elife-09300-fig6-data1.xlsx]

## Sheet: FIG 6E
FIGURE 6E, Colocalization Index					t-Test: Two-Sample Assuming Equal Variances
						Variable 1	Variable 2
(with Alpha2)	TBRII with Vehicle	TBRII with Inhibitor			Mean	0.3329	0.571
Slope from 5 ROI	0.3707	0.6045			Variance	0.00236885	0.00284116
	0.2961	0.6323			Observations	5	5
	0.3493	0.5305			Pooled Variance	0.00260501
	0.3802	0.5849			Hypothesized Mean Difference	0
	0.2682	0.5028			df	8
					t Stat	-7.37607
Mean	0.3329	0.571			P(T<=t) one-tail	3.89812e-05
Stdev	0.0486709	0.0533025			t Critical one-tail	1.85955
					P(T<=t) two-tail	7.79623e-05
					t Critical two-tail	2.306
					reject null hypothesis
					p < 0.001
