# Supplementary material for: Discrete spatial organization of TGFβ receptors couples receptor multimerization and signaling to cellular tension
Source: eLife. 2015 Dec 10;4:e09300. doi: 10.7554/eLife.09300 (PMC4728123; doi:10.7554/eLife.09300)
Supplement: Figure 7—source data 1. — DOI: http://dx.doi.org/10.7554/eLife.09300.019 [file elife-09300-fig7-data1.xlsx]

## Sheet: R1 R2 IP Gel
	FIGURE 7B, R1 R2 Co-IP on Gels
															t-Test: Two-Sample Assuming Equal Variances
N											5 Bio Reps	Average	Std Dev
			Myc IP			Control		Myc/Control	Norm to Plastic		P	1	0			Plastic	0.5 kPa
1	P	1	4114.76		1	1107.86		3.71415	1		0.5	1.55021	0.525584		Mean	1	1.55021
	0.5	2	9627.88		2	1097.1		8.77572	2.36278						Variance	0	0.276238
															Observations	5	5
2	P	1	6128.52		1	714.305		8.57969	1						Pooled Variance	0.138119
	0.5	2	7865.71		2	904.447		8.69671	1.01364						Hypothesized Mean Difference	0
															df	8
3	P	1	4796.37		1	7268.91		0.659846	1						t Stat	-2.34082
	0.5	2	8466.66		2	8035.45		1.05366	1.59683						P(T<=t) one-tail	0.0236775
															t Critical one-tail	1.85955
4	P	1	9025.76		1	10740		0.840389	1						P(T<=t) two-tail	0.0473549
	0.5	2	10546.9		2	10796.1		0.976912	1.16245						t Critical two-tail	2.306
5	P	1	3191.22		1	1045.65		3.05191	1
	0.5	2	6764.88		2	1372.23		4.92983	1.61533						reject null hypothesis
															p < 0.05

## Sheet: pSmad
FIGURE 7C, pSmad
N		pSmad	b-actin		pSmad/b-actin	Norm to Plastic				4 Bio Reps	Average	Std Dev
1	P	3296.52	2802.63		1.17622	1				P	1	0
	P+T	4362.45	2840.51		1.5358	1.3057				P+T	1.57037	0.519351
	0.5	5121.03	2227.09		2.29943	1.95492				0.5	1.77376	0.221935
	0.5 + T	5903.15	2224.21		2.65404	2.25641				0.5 + T	2.15272	0.334653
	16	4762.62	2077.97		2.29196	1.94857				16	1.96264	0.638725
	16+T	4520.91	1666.97		2.71205	2.30573				16+T	2.097	1.05489
2	P	4265.76	2687.75		1.58711	1
	P+T	4136.88	2373.39		1.74303	1.09824
	0.5	7601.85	3269.63		2.32499	1.46492
	0.5 + T	9011.46	3422.75		2.63281	1.65887
	16	6410.39	2755.87		2.32609	1.46561
	16+T	5759.05	2166.11		2.6587	1.67518
3	P	6250.17	712.213		8.7757	1
	P+T	9699.63	695.627		13.9437	1.5889
	0.5	10172.9	605.92		16.7891	1.91314
	0.5 + T	11414.7	566.335		20.1554	2.29673
	16	9464.6	687.92		13.7583	1.56777
	16+T	6550.41	777.749		8.42227	0.959726
4	P	2697.1	1758.21		1.534	1
	P+T	3880.3	1105.26		3.51074	2.28862
	0.5	4457.51	1649.09		2.70301	1.76206
	0.5 + T	9214.82	2504.09		3.67991	2.39889
	16	6476.02	1471.68		4.40043	2.86859
	16+T	8390.77	1586.68		5.28826	3.44736

## Sheet: pSmad stats
t-Test: Two-Sample Assuming Equal Variances
	Plastic	0.5 kPa
Mean	1	1.77376
Variance	0	0.0492553
Observations	4	4
Pooled Variance	0.0246277
Hypothesized Mean Difference	0
df	6
t Stat	-6.97284
P(T<=t) one-tail	0.000216253
t Critical one-tail	1.94318
P(T<=t) two-tail	0.000432506
t Critical two-tail	2.44691
reject null hypothesis
p < 0.05
t-Test: Two-Sample Assuming Equal Variances
	Plastic	0.5 kPa + T
Mean	1	2.15272
Variance	0	0.111993
Observations	4	4
Pooled Variance	0.0559963
Hypothesized Mean Difference	0
df	6
t Stat	-6.88907
P(T<=t) one-tail	0.000230881
t Critical one-tail	1.94318
P(T<=t) two-tail	0.000461762
t Critical two-tail	2.44691
reject null hypothesis
p < 0.05
