# Supplementary material for: Discrete spatial organization of TGFβ receptors couples receptor multimerization and signaling to cellular tension
Source: eLife journal article supplement (doi:10.7554/elife.09300), 2015-12-10
Supplement: supp [file Alk5 R1C1 50frames.xlsx]

## Sheet: Cell1 data
Track Number	Frame	X coordinate	Y coordinate
1	0	403.878	7.08
1	1	405.54	7.174
1	2	405.817	6.559
1	3	405.329	9.031
2	0	412.584	9.251
2	1	412.577	9.791
2	2	412.379	9.684
2	3	412.152	9.568
3	0	328.094	12.375
3	1	328.111	12.442
3	2	327.438	11.578
3	3	327.978	12.695
4	0	422.26	18.668
4	1	422.693	19.579
4	2	422.606	19.885
4	3	422.636	19.639
4	4	422.191	19.479
4	5	422.854	19.308
5	0	376.352	24.097
5	1	374.662	26.4
6	0	392.584	25.37
6	1	393.623	24.902
6	2	394.316	25.832
6	3	392.684	26.326
6	4	392.976	26.299
6	5	392.658	24.316
7	0	236.501	28.448
7	1	236.736	28.308
8	0	136.056	37.207
8	1	135.892	37.103
8	2	136.174	36.468
9	0	149.665	38.817
9	1	149.971	40.492
10	0	210.701	46.822
10	1	210.133	46.254
10	2	209.736	47.02
10	3	210.488	46.218
11	0	370.185	55.698
11	1	370.382	55.56
11	2	370.265	55.745
11	3	370.349	55.467
11	4	370.288	55.38
11	5	370.267	55.545
11	6	370.239	55.426
11	7	370.191	55.426
11	8	370.188	55.376
11	9	370.332	55.376
11	10	370.437	55.622
11	11	370.344	55.582
11	12	370.394	55.314
11	13	370.212	55.314
11	14	370.206	55.448
11	15	370.334	55.622
11	16	370.428	55.483
11	17	370.423	55.486
11	18	370.163	55.661
11	19	370.302	55.448
11	20	370.434	55.691
11	21	370.183	55.376
11	22	370.454	55.287
11	23	370.53	55.521
11	24	370.235	55.656
11	25	370.343	55.824
11	26	370.187	55.719
11	27	370.028	55.097
12	0	211.404	59.735
12	1	211.902	59.539
12	2	211.497	59.236
13	0	155.838	61.064
13	1	155.773	61.052
13	2	155.656	61.038
13	3	155.739	60.528
13	4	155.456	60.724
13	5	155.657	60.851
13	6	155.844	60.954
13	7	155.602	60.772
13	8	155.592	60.464
13	9	155.421	60.965
13	10	155.81	60.64
13	11	155.471	60.715
13	12	155.75	60.617
13	13	155.617	61.176
13	14	156.223	60.865
13	15	155.692	60.959
13	16	155.878	61.021
13	17	155.329	60.644
13	18	155.853	60.852
14	0	136.231	63.442
14	1	135.263	63.49
14	2	137.315	61.553
15	0	193.588	67.478
15	1	193.587	67.202
16	0	378.412	69.865
16	1	378.412	69.747
16	2	379.214	70.521
16	3	378.36	69.339
17	0	364.504	74.296
17	1	364.44	73.776
17	2	365.49	76.267
18	0	185.422	76.925
18	1	184.504	78.511
18	2	185.632	78.29
18	3	184.829	80.663
18	4	184.701	79.799
18	5	185.505	77.822
18	6	185.664	76.847
18	7	184.687	77.048
18	8	184.115	79.277
18	9	184.779	76.935
18	10	184.671	75.514
18	11	184.832	72.689
19	0	163.463	82.61
19	1	161.835	82.633
19	2	160.295	80.761
19	3	158.637	80.252
19	4	158.881	80.104
20	0	378.919	83.164
20	1	379.215	82.997
20	2	379.029	82.422
20	3	378.719	83.477
20	4	378.504	82.857
20	5	378.8	83.03
20	6	378.911	83.193
21	0	157.457	88.729
21	1	156.285	87.389
21	2	156.904	87.375
22	0	122.206	101.8
22	1	122.947	100.851
23	0	360.625	101.086
23	1	360.677	99.918
23	2	362.62	100.646
23	3	364.443	100.227
24	0	325.102	104.631
24	1	325.099	104.575
24	2	325.145	105.163
24	3	325.471	105.168
24	4	324.709	104.906
24	5	325.1	105.107
24	6	324.974	105.172
24	7	324.81	104.869
24	8	324.607	104.874
24	9	325.084	105.093
25	0	352.545	106.605
25	1	354.283	106.558
26	0	310.729	109.241
26	1	310.114	110.815
26	2	310.652	109.525
26	3	310.509	109.473
26	4	310.793	109.381
26	5	310.643	109.164
26	6	310.694	109.407
26	7	311.302	109.408
26	8	309.276	110.313
26	9	307.944	112.398
26	10	306.834	112.355
26	11	305.331	112.759
27	0	300.275	117.086
27	1	301.153	116.807
27	2	301.274	116.904
28	0	202.653	119.322
28	1	203.505	120.026
29	0	252.637	121.201
29	1	251.75	121.232
29	2	251.257	122.418
29	3	251.426	122.198
29	4	252.442	121.498
29	5	254.15	122.59
29	6	254.332	123.115
29	7	252.538	121.835
30	0	292.93	130.715
30	1	293.658	130.017
30	2	293.417	130.437
30	3	294.814	130.582
30	4	296.398	130.452
30	5	295.307	129.501
30	6	294.7	129.513
30	7	292.716	129.944
30	8	292.352	128.537
30	9	293.327	129.258
30	10	294.443	130.014
31	0	171.579	130.582
31	1	171.239	131.584
32	0	309.941	131.86
32	1	310.038	132.064
32	2	309.853	132.043
32	3	309.744	131.771
32	4	310.065	131.759
32	5	310.581	131.769
32	6	310.349	132.009
32	7	310.256	132.158
32	8	310.333	132.038
33	0	118.715	134.33
33	1	118.768	133.912
33	2	118.542	134.307
33	3	118.356	134.309
33	4	118.756	134.308
33	5	118.068	134.676
34	0	241.579	140.675
34	1	241.042	140.904
34	2	240.347	139.047
35	0	231.982	143.321
35	1	231.04	142.766
35	2	230.053	142.569
35	3	231.83	143.541
35	4	232.191	142.472
35	5	230.369	141.501
35	6	230.017	143.578
35	7	231.28	142.313
35	8	230.451	140.777
35	9	229.705	138.655
35	10	229.674	136.697
35	11	227.633	135.137
36	0	332.316	147.049
36	1	333.264	148.492
36	2	332.186	148.762
36	3	330.978	147.891
36	4	332.407	147.909
36	5	333.637	149.745
36	6	334.279	151.239
36	7	333.796	152.151
37	0	94.608	150.168
37	1	94.553	150.04
37	2	94.734	149.879
37	3	97.128	151.31
38	0	158.399	159.902
38	1	158.762	160.018
38	2	158.536	159.691
38	3	157.785	159.722
38	4	157.428	160.352
38	5	157.458	160.034
38	6	157.503	161.153
39	0	270.146	162.443
39	1	269.878	162.374
39	2	269.981	162.411
39	3	270.967	163.029
39	4	271.626	162.619
39	5	272.218	162.271
39	6	272.785	161.904
39	7	274.464	162.651
39	8	274.77	163.239
40	0	196.277	163.415
40	1	197.047	163.097
41	0	244.827	167.832
41	1	243.501	168.887
42	0	226.282	169.92
42	1	225.737	169.606
42	2	226.817	169.452
42	3	228.448	167.215
42	4	228.921	169.084
42	5	227.609	169.124
42	6	227.211	171.283
42	7	227.767	169.602
42	8	228.739	168.31
42	9	229.241	169.518
43	0	267.097	169.827
43	1	266.937	169.886
43	2	267.847	169.28
43	3	270.16	168.502
44	0	210.57	171.825
44	1	211.045	172.449
44	2	210.495	172.21
44	3	210.054	172.268
44	4	209.947	172.328
45	0	283.469	180.608
45	1	282.801	181.816
45	2	285.031	182.048
46	0	48.469	185.813
46	1	49	186.276
47	0	356.187	185.379
47	1	356.534	185.473
47	2	355.051	184.573
47	3	354.422	184.208
47	4	354.265	184.112
47	5	354.335	183.883
48	0	267.037	189.149
48	1	266.603	189.389
49	0	31.443	194.427
49	1	30.789	193.976
49	2	30.867	193.564
49	3	31.252	193.686
49	4	30.393	193.943
49	5	30.927	194.378
49	6	30.694	193.974
49	7	31.313	193.743
49	8	31.342	194.484
49	9	30.67	194.511
49	10	31.176	193.786
49	11	30.824	194.121
49	12	30.632	194.011
49	13	30.787	194.194
49	14	30.328	194.028
49	15	30.746	193.987
49	16	31.022	194.419
49	17	31.26	193.741
49	18	30.994	194.214
49	19	30.882	194.337
49	20	30.679	193.756
49	21	30.801	193.7
49	22	31.389	194.285
49	23	31.083	194.311
49	24	30.862	194.245
49	25	30.993	194.085
49	26	30.67	194.088
49	27	30.733	194.114
49	28	30.87	194.082
49	29	31.338	194.387
49	30	30.972	194.141
49	31	30.808	193.697
49	32	30.47	193.565
49	33	30.93	194.299
49	34	31.322	194.339
49	35	30.931	193.84
49	36	31.38	194.621
49	37	30.864	193.905
49	38	30.748	194.026
49	39	30.982	193.717
49	40	31.574	193.705
49	41	30.759	194.01
49	42	30.486	193.941
49	43	30.708	194.101
49	44	30.885	193.457
49	45	30.704	194.484
49	46	30.998	193.751
49	47	31.011	194.269
49	48	30.551	194.288
49	49	30.708	194.292
50	0	37.65	196.495
50	1	37.48	196.829
50	2	37.441	196.476
50	3	37.345	196.732
50	4	37.514	196.697
50	5	37.467	196.834
50	6	37.419	196.424
50	7	37.421	196.627
50	8	37.546	196.446
50	9	37.449	196.493
50	10	37.485	196.461
50	11	37.347	196.484
50	12	37.241	196.497
50	13	37.693	196.986
50	14	37.477	196.719
50	15	37.595	196.823
50	16	37.623	196.478
50	17	37.35	196.683
50	18	37.458	196.668
50	19	37.416	196.502
50	20	37.456	196.485
50	21	37.657	196.167
50	22	37.45	196.415
50	23	37.394	196.472
50	24	37.485	197.109
50	25	37.493	196.514
50	26	37.563	196.471
50	27	37.545	196.319
50	28	37.525	196.506
50	29	37.401	196.612
50	30	37.281	196.387
50	31	37.327	196.718
50	32	37.39	196.6
50	33	37.303	196.659
50	34	37.486	196.799
50	35	37.313	196.693
50	36	37.238	196.766
50	37	37.017	196.773
50	38	37.16	196.272
50	39	37.44	196.97
50	40	37.579	197.024
50	41	37.408	197.17
50	42	37.327	196.501
50	43	37.295	197.127
50	44	37.37	196.789
50	45	37.421	196.511
50	46	36.919	196.583
50	47	37.281	196.62
50	48	37.43	196.65
50	49	36.887	196.514
51	0	317.916	197.153
51	1	316.875	194.726
51	2	317.33	193.275
51	3	314.567	192.585
52	0	299.381	215.379
52	1	299.55	215.624
52	2	299.222	215.956
53	0	231.849	225.362
53	1	231.37	225.205
53	2	229.394	226.424
54	0	299.346	228.074
54	1	299.708	228.549
55	0	371.954	233.55
55	1	371.699	233.351
56	0	193.922	238.433
56	1	194.262	238.579
57	0	294.9	239.67
57	1	296.03	240.136
58	0	339.623	239.505
58	1	338.602	237.74
58	2	336.798	239.117
58	3	335.888	239.772
58	4	336.609	238.99
58	5	337.662	240.187
58	6	337.976	238.988
58	7	339.294	236.816
58	8	340.256	236.094
58	9	339.81	234.77
58	10	339.469	233.647
58	11	337.56	235.21
58	12	338.916	234.773
59	0	193.821	246.596
59	1	195.957	245.587
59	2	196.302	246.951
60	0	180.617	252.108
60	1	180.134	252.201
60	2	179.462	253.639
60	3	181.675	254.41
60	4	182.299	255.627
60	5	183.213	256.681
60	6	182.291	257.839
60	7	181.708	257.711
60	8	181.875	257.602
60	9	183.254	257.958
60	10	183.671	257.408
60	11	183.812	259.71
60	12	185.396	260.885
60	13	185.435	262.683
61	0	251.005	259.69
61	1	249.683	261.14
62	0	218.281	259.957
62	1	218.513	259.604
62	2	218.754	259.382
62	3	218.771	259.066
62	4	217.718	259.164
62	5	218.229	259.375
62	6	219.171	259.326
63	0	161.297	264.222
63	1	160.638	264.525
63	2	160.571	264.44
63	3	160.36	264.424
63	4	160.472	264.731
63	5	160.294	264.593
63	6	160.502	264.625
64	0	177.78	264.826
64	1	177.923	265.924
64	2	177.608	266.115
64	3	177.581	265.355
64	4	177.9	264.428
64	5	178.34	264.423
64	6	176.952	263.201
65	0	262.228	277.572
65	1	260.099	278.658
65	2	258.462	277.687
66	0	181.179	280.5
66	1	181.45	282.769
66	2	182.487	280.581
66	3	182.062	280.499
66	4	181.544	280.482
66	5	181.84	281.242
66	6	181.788	283.176
67	0	277.453	290.157
67	1	277.085	290.14
67	2	276.738	290.008
67	3	276.576	289.763
67	4	276.851	289.787
67	5	276.889	289.972
67	6	277.117	290.173
67	7	276.839	290.085
67	8	276.851	290.325
67	9	277.21	289.933
68	0	266.898	312.142
68	1	268.575	310.579
68	2	268.541	310.329
68	3	266.509	309.441
68	4	267.295	308.163
68	5	269.082	306.079
68	6	268.564	307.599
68	7	268.542	307.75
68	8	269.139	306.66
69	0	119.538	320.956
69	1	119.494	320.988
70	0	198.545	325.168
70	1	199.411	323.905
71	0	216.416	339.365
71	1	217.324	338.797
72	0	190.409	343.871
72	1	190.866	342.85
72	2	191.242	340.964
72	3	189.439	340.935
73	0	197.397	347.699
73	1	198.769	346.537
73	2	200.671	345.664
74	0	194.857	377.9
74	1	194.843	377.683
74	2	194.973	377.659
74	3	194.494	377.764
74	4	194.883	377.715
74	5	195.154	377.467
74	6	195.448	378.489
75	0	168.974	424.076
75	1	169.073	424.133
75	2	169.613	423.834
75	3	169.128	424.091
75	4	169.029	424.37
76	0	206.203	442.93
76	1	206.089	442.557
76	2	206.527	442.06
76	3	206.467	442.555
76	4	205.835	442.347
76	5	205.975	442.696
76	6	205.836	442.512
76	7	205.818	442.37
76	8	205.796	442.312
76	9	205.197	442.217
76	10	206.405	442.576
76	11	206.114	442.205
76	12	205.852	442.518
77	0	273.251	465.133
77	1	273.562	465.39
78	1	392.563	14.384
78	2	393.318	12.018
79	1	482.365	93.808
79	2	482.408	93.878
80	1	348.587	95.021
80	2	348.885	95.209
80	3	348.462	95.397
80	4	348.02	95.197
80	5	348.164	95.332
80	6	348.364	95.276
80	7	348.021	94.939
80	8	348.097	95.263
80	9	348.433	95.105
81	1	297.245	101.021
81	2	297.212	101.617
81	3	297.295	101.305
82	1	242.063	115.063
82	2	242.52	115.839
82	3	243.605	116.229
82	4	243.945	116.511
82	5	244.527	117.974
82	6	243.951	117.148
82	7	243.971	117.112
83	1	296.447	123.966
83	2	296.125	123.952
84	1	288.383	127.107
84	2	288.15	125.033
85	1	279.065	146.492
85	2	279.201	145.615
85	3	279.562	144.731
86	1	87.195	176.316
86	2	86.809	175.889
86	3	86.813	176.651
87	1	168.625	179.099
87	2	169.271	180.1
88	1	306.093	190.611
88	2	306.598	191.56
88	3	307.261	194.37
88	4	307.779	193.581
88	5	306.996	193.323
89	1	385.358	199.369
89	2	385.458	199.545
89	3	385.006	199.845
90	1	268.824	214.681
90	2	267.641	215.756
91	1	284.652	279.964
91	2	284.612	279.627
92	1	190.594	295.664
92	2	188.056	295.379
93	1	486.542	321.485
93	2	486.997	321.303
94	1	177.53	344.351
94	2	176.869	344.409
95	1	243.073	357.596
95	2	242.824	357.752
95	3	242.799	357.431
96	1	337.774	384.418
96	2	337.71	384.552
96	3	338.316	384.55
96	4	338.433	384.682
96	5	337.847	384.744
97	1	460.297	450.307
97	2	461.292	450.524
98	1	347.333	502.833
98	2	346.85	502.758
99	2	137.65	6.279
99	3	138.343	5.727
99	4	137.136	4.37
99	5	137.32	5.305
100	2	370.071	16.254
100	3	369.972	14.959
100	4	369.208	15.51
100	5	371.005	13.365
101	2	407.782	27.6
101	3	407.759	27.986
102	2	417.145	32.651
102	3	418.064	31.796
103	2	180.236	72.808
103	3	179.119	74.172
103	4	176.534	74.96
104	2	461.961	109.005
104	3	462.008	108.991
105	2	207.069	113.058
105	3	208.413	114.207
106	2	334.002	121.648
106	3	333.927	123.364
106	4	333.724	123.459
106	5	332.892	124.031
106	6	331.701	121.755
106	7	333.328	123.575
107	2	201.16	137.939
107	3	199.732	136.961
107	4	199.323	137.215
108	2	96.713	143.297
108	3	98.137	143.543
109	2	275.99	150.515
109	3	276.646	151.317
109	4	276.478	150.975
109	5	276.488	150.79
109	6	276.717	150.398
109	7	276.762	150.613
109	8	277.013	150.61
109	9	276.661	149.775
109	10	277.635	149.889
109	11	277.231	149.988
110	2	171.017	158.903
110	3	170.91	158.041
111	2	392.655	176.856
111	3	392.341	176.557
111	4	392.419	177.014
111	5	392.319	177.3
112	2	298.438	203.156
112	3	299.104	203.333
113	2	293.753	237.237
113	3	293.526	237.183
113	4	295.687	239.033
113	5	295.717	238.103
114	2	189.522	239.918
114	3	189.364	241.011
115	2	305.229	240.61
115	3	305.312	240.404
115	4	305.771	240.216
116	2	218.519	245.639
116	3	216.166	244.632
116	4	217.424	243.583
116	5	218.618	243.908
116	6	218.172	242.081
117	2	331.19	255.302
117	3	330.879	254.186
117	4	333.259	252.569
118	2	335.245	270.208
118	3	335.424	269.858
118	4	335.214	270.614
118	5	335.722	269.895
118	6	335.672	270.296
118	7	335.611	269.94
118	8	335.593	270.289
118	9	335.55	270.218
118	10	335.782	270.481
118	11	335.558	270.093
118	12	335.549	270.09
118	13	335.352	270.158
118	14	335.497	269.698
118	15	335.252	270.139
119	2	317.565	274.057
119	3	317.673	274.202
120	2	236.624	284.496
120	3	237.387	282.903
121	2	202.67	325.93
121	3	205.195	326.37
122	2	130.86	336.203
122	3	130.405	335.543
123	2	212.938	338.04
123	3	211.698	337.366
123	4	211.637	338.123
124	2	199.791	382.611
124	3	199.572	381.93
124	4	198.744	382.363
124	5	198.757	381.81
125	2	223.762	456.506
125	3	223.8	456.962
126	3	438.051	1.675
126	4	435.419	1.285
126	5	435.791	0.841
126	6	436.516	2.22
126	7	435.731	1.515
127	3	383.777	16.545
127	4	384.238	17.105
127	5	385.677	18.128
127	6	386.614	17.955
127	7	385.822	17.447
127	8	383.559	18.264
127	9	384.399	19.919
128	3	147.604	39.113
128	4	147.211	37.381
129	3	328.095	60.811
129	4	327.599	60.845
130	3	400.566	84.969
130	4	400.013	85.298
131	3	244.834	109.211
131	4	244.938	108.853
132	3	304.627	116.651
132	4	305.62	115.347
132	5	305.923	117.535
132	6	306.735	117.984
133	3	336.707	116.41
133	4	336.814	118.116
134	3	97.487	135.441
134	4	97.732	135.098
135	3	237.083	136.695
135	4	239.501	136.852
135	5	241.49	135.24
135	6	240.746	133.713
135	7	240.677	135.446
135	8	240.486	138.252
135	9	239.746	138.668
136	3	365.046	142.839
136	4	365.32	142.667
137	3	200.188	164.978
137	4	200.93	164.501
138	3	246.465	166.576
138	4	247.219	165.705
138	5	247.749	164.227
139	3	165.714	180.027
139	4	165.817	180.728
140	3	49.11	186.435
140	4	48.703	185.905
140	5	48.875	185.684
140	6	49.445	185.895
141	3	189.469	186.831
141	4	188.721	186.469
142	3	268.198	186.922
142	4	266.524	188.494
143	3	343.549	186.683
143	4	341.776	188.299
143	5	341.143	189.507
143	6	341.6	191.343
143	7	343.036	191.033
143	8	344.479	192.017
143	9	342.422	193.228
144	3	164.998	191.394
144	4	165.63	190.431
144	5	165.593	189.476
144	6	165.517	191.261
145	3	286.128	191.846
145	4	287.062	192.512
145	5	285.439	193.066
146	3	346.141	200.544
146	4	346.568	198.546
146	5	347.576	196.621
146	6	348.494	194.253
146	7	349.436	194.655
146	8	347.351	195.165
146	9	349.368	195.413
146	10	351.713	196.216
146	11	349.771	194.979
146	12	348.489	193.682
146	13	350.885	193.687
146	14	348.563	194.278
146	15	350.243	194.632
146	16	348.375	193.442
147	3	263.527	215.737
147	4	263.646	214.742
148	3	228.801	229.389
148	4	228.23	228.828
148	5	228.496	228.701
148	6	228.384	227.976
148	7	228.243	226.299
148	8	227.962	225.294
148	9	227.516	226.226
148	10	227.067	226.79
148	11	228.385	225.613
149	3	378.813	240.511
149	4	378	240.412
149	5	378.178	239.064
150	3	365.246	243.262
150	4	365.536	242.925
151	3	200.739	246.604
151	4	201.408	247.434
151	5	199.718	247.097
152	3	226.325	254.055
152	4	223.982	252.396
153	3	226.527	318.954
153	4	227.441	317.413
153	5	228.16	315.751
153	6	229.095	314.321
154	3	224.611	325.274
154	4	225.467	325.454
154	5	225.622	322.907
154	6	225.299	323.104
155	3	174.873	368.35
155	4	174.175	368.468
155	5	174.219	370.353
156	4	384.081	7.571
156	5	383.434	7.086
156	6	382.565	8.412
156	7	383.501	7.363
157	4	144.792	14.246
157	5	144.173	14.236
157	6	143.754	14.834
157	7	144.734	13.685
157	8	144.367	14.445
157	9	143.403	14.138
157	10	143.752	14.666
157	11	144.069	13.687
157	12	144.328	13.598
157	13	145.801	12.778
157	14	146.07	13.522
158	4	249.952	35.998
158	5	249.943	36.057
159	4	133.667	38.79
159	5	133.72	38.254
160	4	254.186	67.008
160	5	254.277	66.7
160	6	254.465	66.694
160	7	254.232	66.775
160	8	254.108	66.778
160	9	254.322	66.616
160	10	254.223	66.737
160	11	254.158	66.886
160	12	254.027	66.289
160	13	254.156	66.711
160	14	254.558	66.576
160	15	254.182	66.661
160	16	254.618	66.687
160	17	254.327	67.023
160	18	254.218	66.839
160	19	254.406	66.692
161	4	314.249	81.15
161	5	314.405	80.68
162	4	366.513	97.635
162	5	367.035	99.491
162	6	366.456	100.835
162	7	364.485	101.123
162	8	364.322	100.863
162	9	363.869	101.523
163	4	195.414	157.543
163	5	195.226	159.068
163	6	195.052	160.219
164	4	183.344	186.73
164	5	181.068	186.465
165	4	217.023	197.332
165	5	214.968	195.954
166	4	298.684	216.825
166	5	299.507	216.936
166	6	299.589	217.539
166	7	299.974	217.026
167	4	285.453	279.73
167	5	284.592	279.804
167	6	284.731	279.765
168	4	285.982	300.8
168	5	285.879	300.644
169	4	85.452	308.323
169	5	85.012	308.545
170	4	304.939	326.669
170	5	304.635	326.362
170	6	304.513	326.434
170	7	304.711	326.296
170	8	304.552	326.116
170	9	304.366	326.329
171	4	212.64	334.726
171	5	212.908	334.983
171	6	211.605	333.941
172	4	93.46	340.192
172	5	93.417	340.132
173	4	437.457	346.55
173	5	437.341	346.285
174	4	201.797	347.149
174	5	200.549	347.521
175	4	190.802	392.717
175	5	189.127	392.26
175	6	188.449	391.714
176	4	211.704	431.558
176	5	212.209	432.582
176	6	212.728	433.371
177	4	277.539	493.61
177	5	277.545	493.912
178	5	412.248	10.012
178	6	411.776	10.541
178	7	412.433	9.432
178	8	412.142	9.433
178	9	412.331	10.141
179	5	328.052	12.246
179	6	327.811	12.457
179	7	327.863	11.534
179	8	328.284	12.207
179	9	328.115	12.284
179	10	327.96	12.795
179	11	328.127	12.517
179	12	327.746	11.529
179	13	327.723	12.311
179	14	327.652	12.276
179	15	328.345	12.483
179	16	328.393	12.077
179	17	327.938	12.812
179	18	327.586	11.611
179	19	328.147	12.226
179	20	328.131	12.487
179	21	328.211	12.25
179	22	328.391	12.303
179	23	328.457	12.96
179	24	328.376	12.567
179	25	328.214	12.154
179	26	328.185	12.383
179	27	327.734	13.048
179	28	328.098	12.533
179	29	327.893	12.97
179	30	328.16	12.747
179	31	328.682	12.813
179	32	327.56	12.522
179	33	328.242	12.758
179	34	327.981	13.166
179	35	328.315	12.661
179	36	327.739	12.13
179	37	327.766	11.926
179	38	327.591	11.762
179	39	327.976	12.118
179	40	328.138	12.675
179	41	328.268	12.398
179	42	327.914	11.873
179	43	328.304	12.303
179	44	328.191	12.564
179	45	328.325	12.134
179	46	327.526	11.729
179	47	327.799	12.535
179	48	328.098	13.035
179	49	327.632	13.27
180	5	362.272	22.422
180	6	362.435	23.03
180	7	363.118	23.434
181	5	401.453	36.348
181	6	400.589	37.395
182	5	138.265	50.412
182	6	138.217	50.619
182	7	137.841	50.54
182	8	137.813	50.502
182	9	138.098	50.555
182	10	138.1	50.58
182	11	138.083	50.627
182	12	138.135	50.439
183	5	128.649	54.94
183	6	127.647	53.085
183	7	127.286	51.052
183	8	126.858	51.458
183	9	126.207	50.674
183	10	125.916	50.233
183	11	125.86	50.359
184	5	159.137	91.504
184	6	158.695	93.437
184	7	157.404	93.706
184	8	155.614	93.396
185	5	149.245	95.592
185	6	151.559	94.588
186	5	211.255	118.255
186	6	211.817	119.104
186	7	213.185	119.216
186	8	213.744	118.645
186	9	211.884	117.321
186	10	210.466	118.921
186	11	211.158	116.656
186	12	210.471	116.428
187	5	199.071	133.598
187	6	197.944	133.716
187	7	198.394	134.743
187	8	198.169	135.789
187	9	198.26	135.525
187	10	198.68	135.072
187	11	197.612	134.615
187	12	195.884	133.8
188	5	199.689	141.026
188	6	198.833	141.672
189	5	124.759	146.709
189	6	123.03	145.529
190	5	170.691	156.634
190	6	171.986	157.72
190	7	171.305	158.407
190	8	170.234	160.374
191	5	86.615	176.328
191	6	87.183	176.249
191	7	87.056	176.293
191	8	86.946	176.145
192	5	239.455	177.084
192	6	238.344	176.022
192	7	239.202	174.567
192	8	238.98	174.611
193	5	299.958	201.644
193	6	300.209	200.172
193	7	302.152	198.606
193	8	302.36	196.065
193	9	303.664	197.119
193	10	304.527	196.521
193	11	305.736	196.065
194	5	115.919	223.81
194	6	116.224	223.153
195	5	184.056	239.076
195	6	186.684	238.344
195	7	186.153	237.822
195	8	187.486	238.398
196	5	230.328	251.159
196	6	228.358	252.513
197	5	199.728	257.748
197	6	197.88	257.629
197	7	197.952	255.316
197	8	199.619	256.176
197	9	200.453	254.212
198	5	259.091	279.332
198	6	258.862	279.994
198	7	256.947	280.377
199	5	208.685	320.871
199	6	209.62	321.763
199	7	211.768	321.563
199	8	210.434	320.452
199	9	210.822	319.03
199	10	210.783	319.289
199	11	211.685	319.057
199	12	212.649	320.56
200	5	181.933	432.215
200	6	182.187	432.24
201	5	224.47	455.53
201	6	224.622	455.659
202	5	305.158	463.491
202	6	304.946	463.512
203	5	166.955	473.551
203	6	166.754	473.222
203	7	166.571	473.092
203	8	166.879	473.189
203	9	166.772	473.251
203	10	166.799	473.23
204	6	137.31	8.483
204	7	138.065	9.276
204	8	137.513	9.285
204	9	137.809	9.202
204	10	137.557	11.509
204	11	136.764	11.364
204	12	137.184	10.001
204	13	137.514	8.537
205	6	368.668	9.35
205	7	368.967	6.709
205	8	370.608	6.659
205	9	369.743	4.345
205	10	369.788	4.243
205	11	369.329	5.248
205	12	371.161	5.058
205	13	370.566	6.098
206	6	140.378	37.416
206	7	141.173	37.794
206	8	139.889	39.278
206	9	140.38	38.143
207	6	209.647	46.456
207	7	210.631	46.262
207	8	210.509	46.109
208	6	171.443	56.006
208	7	171.737	56.205
208	8	172.044	56.321
208	9	171.439	56.399
208	10	171.509	56.375
208	11	171.544	56.528
208	12	171.593	56.564
208	13	171.717	56.749
208	14	170.734	56.483
208	15	171.361	56.151
208	16	171.586	56.456
208	17	171.317	56.221
208	18	171.188	56.798
208	19	171.424	56.316
208	20	170.783	56.438
208	21	171.369	56.081
209	6	356.307	76.734
209	7	353.772	78.206
210	6	400.206	84.36
210	7	400.664	85.017
211	6	460.801	110.834
211	7	460.782	111.303
211	8	460.828	110.631
212	6	279.258	115.306
212	7	279.708	114.92
212	8	279.831	115.506
212	9	279.75	115.362
212	10	279.778	115.172
212	11	279.508	115.566
212	12	280.055	115.633
212	13	280.297	115.44
213	6	191.829	158.586
213	7	191.622	157.979
214	6	209.973	172.161
214	7	210.578	171.997
214	8	209.979	171.827
214	9	209.751	171.668
214	10	209.496	172.149
214	11	210.48	171.811
214	12	210.02	171.696
214	13	211.381	171.733
214	14	210.81	172.095
214	15	209.797	172.15
214	16	210.539	172.437
214	17	209.968	171.683
214	18	210.072	172.035
214	19	211.327	172.24
215	6	176.33	186.599
215	7	177.044	187.581
216	6	304.061	192.82
216	7	302.257	193.31
217	6	184.659	197.761
217	7	186.887	197.374
217	8	185.646	196.492
217	9	186.162	196.835
217	10	186.193	196.611
217	11	188.408	197.918
218	6	360.449	223.395
218	7	359.408	222.331
218	8	361.742	221.731
218	9	361.087	220.714
218	10	360.261	219.399
218	11	360.265	218.381
218	12	361.003	219.264
218	13	360.252	219.673
219	6	292.376	235.532
219	7	291.975	235.779
220	6	328.804	253.931
220	7	325.981	254.175
221	6	288.536	260.083
221	7	288.324	260.741
221	8	289.13	260.131
221	9	288.942	259.596
221	10	288.77	260.701
221	11	288.317	260.713
221	12	288.382	259.969
221	13	288.453	260.326
222	6	348.753	268.289
222	7	348.831	268.026
222	8	348.515	268.25
222	9	348.803	268.397
222	10	348.76	267.905
222	11	348.51	268.388
222	12	348.869	268
222	13	348.824	268.231
223	6	260.718	349.391
223	7	260.352	350.462
223	8	260.632	350.396
224	6	204.137	486.705
224	7	204.84	486.984
225	7	387.815	3.309
225	8	390.015	3.09
225	9	388.994	3.135
226	7	403.745	13.063
226	8	403.206	11.294
226	9	402.077	12.405
227	7	388.84	24.841
227	8	388.265	25.038
227	9	389.757	26.082
227	10	388.369	23.758
228	7	236.099	28.602
228	8	236.48	27.574
229	7	351.149	58.436
229	8	351.744	57.86
229	9	351.303	57.772
229	10	351.871	57.926
229	11	351.835	57.321
230	7	455.162	68.495
230	8	454.741	69.25
230	9	455.334	70.133
230	10	455.121	69.574
230	11	455.609	69.972
231	7	162.768	74.647
231	8	161.024	74.477
232	7	333.432	79.833
232	8	333.634	79.639
233	7	330.483	88.657
233	8	332.255	88.451
234	7	206.39	112.537
234	8	207.521	114.231
235	7	200.214	160.546
235	8	199.137	159.679
235	9	200.295	158.686
236	7	246.625	167.454
236	8	243.993	168.029
237	7	499.476	174.669
237	8	499.082	174.756
237	9	499.596	174.599
238	7	263.14	215.947
238	8	262.735	214.496
239	7	293.276	239.112
239	8	291.423	238.413
239	9	289.795	236.516
239	10	291.083	236.18
240	7	398.357	242.697
240	8	398.647	242.605
241	7	221.373	243.703
241	8	222.179	243.823
241	9	222.992	244.505
241	10	222.468	243.63
241	11	223.625	245.443
241	12	223.47	243.205
242	7	306.677	244.116
242	8	307.865	241.72
243	7	222.64	257.296
243	8	223.741	258.011
244	7	399.55	272.975
244	8	399.744	273.429
245	7	182.152	286.399
245	8	181.393	287.477
245	9	181.261	287.71
245	10	181.583	286.856
246	7	257.02	322.483
246	8	258.616	322.812
246	9	257.763	321.785
246	10	256.811	322.345
246	11	257.186	322.139
246	12	257.559	324.722
247	7	93.555	340.218
247	8	93.816	340.102
247	9	93.868	340.199
248	7	228.002	368.703
248	8	227.996	368.454
249	7	182.656	447.954
249	8	182.122	447.914
250	7	224.521	473.23
250	8	224.556	474.212
250	9	225.05	474.545
251	7	123.969	483.102
251	8	123.916	483.338
251	9	124.165	483.213
251	10	123.983	483.316
251	11	123.962	483.23
251	12	123.536	483.08
251	13	123.79	483.183
251	14	123.795	483.336
252	8	283.832	27.58
252	9	283.566	26.37
253	8	140.672	59.488
253	9	139.081	59.505
254	8	131.205	62.563
254	9	129.578	61.601
255	8	364.143	75.803
255	9	361.873	77.204
255	10	364.284	76.531
256	8	155.153	79.043
256	9	155.237	81.128
256	10	155.255	81.538
256	11	156.517	82.405
256	12	154.551	83.082
256	13	154.604	83.647
256	14	155.229	83.382
256	15	154.745	82.854
256	16	154.852	81.503
256	17	153.05	79.652
256	18	154.493	79.771
256	19	154.482	80.178
256	20	153.736	81.091
256	21	152.619	82.994
256	22	153.815	81.348
256	23	151.203	81.593
256	24	152.238	80.53
257	8	221.36	107.619
257	9	222.171	108.708
258	8	316.232	111.153
258	9	314.848	110.615
258	10	314.049	110.861
258	11	311.891	110.884
258	12	311.491	110.496
258	13	311.351	110.232
258	14	309.631	108.042
258	15	309.621	107.631
258	16	312.114	108.244
259	8	335.337	130.042
259	9	334.663	131.203
259	10	333.538	129.315
260	8	156.507	158.713
260	9	156.143	158.646
260	10	156.122	158.8
260	11	156.305	158.998
260	12	157.202	159.439
260	13	156.759	160.018
260	14	156.989	160.103
260	15	157.298	159.888
260	16	157.48	160.179
260	17	157.286	159.752
260	18	157.195	159.552
260	19	157.35	159.358
260	20	157.376	160.296
260	21	156.483	160.578
260	22	156.537	160.615
260	23	157.449	161.3
260	24	156.942	160.72
260	25	156.973	160.55
260	26	158.319	159.957
260	27	158.298	160.53
260	28	158.002	162.109
260	29	158.163	162.496
260	30	158.01	163.187
260	31	158.795	164.04
260	32	159.747	163.307
260	33	159.947	164.021
260	34	159.753	163.73
260	35	159.889	163.573
260	36	159.298	164.8
260	37	158.101	164.453
260	38	158.568	163.476
260	39	158.045	163.214
261	8	195.998	161.272
261	9	195.774	160.177
261	10	195.606	159.964
261	11	196.669	159.38
261	12	197.091	158.944
261	13	195.888	159.375
261	14	195.551	160.477
261	15	195.585	159.736
262	8	162.01	164.137
262	9	162.051	163.632
263	8	221.298	199.219
263	9	219.306	200.192
264	8	189.784	232.425
264	9	190.471	233.017
265	8	190.132	240.331
265	9	189.425	240.294
265	10	190.269	238.721
265	11	189.187	240.27
265	12	189.96	242.418
265	13	189.701	243.436
265	14	190.616	243.174
265	15	190.357	241.538
265	16	189.927	243.416
265	17	188.933	242.587
265	18	188.517	242.923
265	19	189.275	243.195
265	20	190.671	242.556
265	21	190.99	243.432
266	8	195.246	250.21
266	9	196.264	251.471
266	10	195.275	250.443
266	11	193.733	250.805
266	12	194.239	252.214
266	13	193.341	253.325
266	14	194.957	251.853
266	15	196.225	253.703
267	8	122.897	257.715
267	9	123.299	257.78
268	8	211.609	338.681
268	9	211.719	337.759
268	10	211.565	336.507
268	11	211.75	337.144
268	12	211.433	337.728
268	13	211.365	337.756
269	8	247.591	339.158
269	9	247.769	339.421
270	8	177.017	344.273
270	9	176.402	344.821
270	10	176.572	344.972
270	11	175.681	345.309
271	8	194.663	377.691
271	9	195.082	377.903
272	9	378.133	69.121
272	10	378.264	69.224
272	11	377.95	69.758
272	12	378.063	69.379
273	9	321.377	85.264
273	10	321.217	84.966
274	9	183.148	105.258
274	10	183.013	106.046
274	11	183.578	105.395
274	12	183.394	105.509
274	13	182.985	105.148
275	9	291.312	114.763
275	10	289.915	115.594
275	11	290.656	115.558
276	9	246.363	117.752
276	10	244.611	118.057
277	9	252.478	121.513
277	10	253.162	121.001
278	9	201.647	142.478
278	10	201.681	139.806
278	11	201.033	137.584
279	9	124.883	146.739
279	10	125.517	146.267
279	11	123.517	146.35
279	12	124.442	147.224
279	13	123.384	146.549
280	9	239.735	166.788
280	10	237.75	166.612
280	11	237.86	167.823
280	12	239.956	168.9
280	13	238.954	169.332
281	9	170.777	175.569
281	10	171.169	176.275
282	9	391.83	176.932
282	10	392.687	176.793
282	11	392.496	176.997
282	12	392.62	176.967
282	13	392.367	177.212
283	9	160.865	178.755
283	10	160.695	179.129
284	9	48.419	185.781
284	10	49.387	185.608
284	11	48.62	186.139
284	12	49.189	185.493
284	13	48.852	185.71
285	9	341.699	191.81
285	10	342.259	191.407
285	11	341.629	190.353
285	12	341.313	189.323
286	9	338.35	209.877
286	10	338.716	210.214
287	9	260.195	211.622
287	10	258.596	209.635
288	9	188.313	217.284
288	10	189.417	215.809
288	11	188.747	215.736
289	9	390.395	226.689
289	10	390.507	226.595
289	11	390.685	226.591
289	12	390.235	226.656
289	13	390.257	226.807
289	14	390.935	226.637
289	15	390.162	226.404
289	16	390.538	226.468
289	17	390.185	226.319
290	9	330.019	251.686
290	10	329.511	253.84
291	9	218.572	259.52
291	10	218.554	258.48
291	11	219.048	258.173
291	12	218.433	259.341
292	9	227.654	259.298
292	10	227.851	258.634
292	11	225.281	259.679
292	12	225.669	260.4
293	9	259.7	280.467
293	10	259.47	279.386
293	11	259.524	279.054
294	9	152.039	309.432
294	10	152.463	310.181
295	9	97.561	313.47
295	10	96.964	313.111
295	11	97.183	313.397
295	12	96.764	313.14
295	13	97.361	313.035
295	14	97.029	313.253
295	15	97.227	313.068
295	16	96.983	313.133
295	17	97.09	313.106
295	18	97.037	313.324
296	9	271.596	320.042
296	10	271.203	320.354
297	9	221.426	329.346
297	10	222.521	330.063
298	9	156.874	429.342
298	10	156.302	429.487
298	11	156.638	429.423
298	12	156.629	429.214
298	13	156.146	429.59
299	9	214.03	431.47
299	10	213.309	432.747
300	9	108.993	481.499
300	10	108.54	481.475
301	10	400.257	9.753
301	11	398.945	9.397
302	10	378.458	22.956
302	11	380.062	21.429
302	12	380.433	22.299
302	13	380.198	23.455
303	10	293.812	26.334
303	11	293.69	27.061
304	10	354.58	78.446
304	11	354.762	77.622
305	10	400.223	85.109
305	11	400.734	85.146
305	12	400.332	85.2
305	13	400.446	85.782
305	14	400.48	84.998
305	15	400.123	85.198
306	10	328.92	90.929
306	11	326.601	91.139
306	12	328.706	92.161
306	13	329.204	91.275
306	14	329.353	93.61
307	10	183.962	97.417
307	11	183.71	97.071
308	10	225.284	109.703
308	11	224.99	109.441
308	12	224.798	109.755
308	13	224.713	109.665
308	14	225.835	109.206
308	15	224.585	109.246
308	16	222.877	107.513
309	10	332.832	122.845
309	11	331.633	125.513
310	10	288.499	132.632
310	11	288.13	132.629
311	10	309.892	132.353
311	11	310.255	132.221
311	12	310.424	132.23
311	13	310.097	131.969
311	14	309.943	132.158
312	10	274.381	163.416
312	11	274.061	164.421
312	12	273.191	164.615
312	13	273.041	165.189
312	14	273.28	165.632
312	15	271.461	166.107
312	16	270.084	166.06
312	17	270.519	166.005
312	18	270.402	166.207
312	19	271.632	165.587
313	10	229.607	165.386
313	11	231.393	167.49
314	10	272.456	174.619
314	11	272.987	176.366
314	12	273.022	179.273
315	10	86.589	176.147
315	11	86.932	176.03
316	10	265.527	189.277
316	11	267.681	189.468
317	10	273.582	211.82
317	11	273.127	211.967
318	10	307.208	227.733
318	11	308.129	227.712
318	12	309.434	229.146
318	13	309.592	229.241
318	14	309.083	230.252
318	15	311.692	229.202
319	10	183.183	241.653
319	11	183.836	241.889
320	10	420.728	247.568
320	11	420.791	247.803
320	12	420.596	247.776
320	13	420.358	247.703
320	14	420.714	247.671
321	10	203.158	252.727
321	11	200.814	251.189
322	10	251.467	256.47
322	11	250.992	257.546
323	10	113.679	257.542
323	11	113.472	257.305
324	10	272.289	303.504
324	11	272.18	303.587
324	12	271.626	303.156
324	13	272.64	301.721
324	14	271.677	302.79
325	10	375.774	304.378
325	11	375.776	304.07
326	10	251.368	305.71
326	11	250.298	306.56
327	10	226.774	315.759
327	11	224.543	315.212
328	10	94.719	385.528
328	11	94.12	386.024
329	10	172.233	416.834
329	11	172.362	417.228
330	11	96.25	17.098
330	12	97.192	17.96
330	13	97.025	17.259
330	14	96.556	17.938
331	11	313.417	87.226
331	12	312.436	88.622
332	11	325.429	105.037
332	12	325.494	104.371
333	11	365.615	104.975
333	12	365.729	106.517
333	13	367.94	105.556
334	11	230.312	111.451
334	12	229.887	111.956
335	11	241.738	117.23
335	12	242.521	115.431
335	13	241.089	114.879
335	14	240.812	115.638
335	15	243.388	116.188
335	16	244.241	113.663
335	17	246.71	114.032
336	11	293.716	126.655
336	12	295.456	127.422
336	13	296.654	126.922
337	11	119.402	140.711
337	12	120.02	142.616
338	11	168.581	161.908
338	12	166.424	160.092
338	13	166.317	160.856
338	14	165.576	159.351
338	15	166.34	159.772
338	16	165.245	157.338
338	17	164.798	156.201
338	18	166.014	153.908
338	19	166.983	155.468
338	20	167.453	153.584
338	21	166.336	152.36
339	11	159.626	176.066
339	12	157.802	175.086
339	13	157.736	173.843
339	14	158.659	172.477
340	11	350.385	178.925
340	12	351.199	177.684
341	11	268.291	203.131
341	12	268.678	202.884
341	13	268.762	202.455
341	14	270.094	202.337
341	15	271.791	203.341
342	11	300.891	203.76
342	12	302.885	204.905
342	13	301.459	205.393
342	14	300.166	204.771
343	11	261.987	208.103
343	12	263.909	208.656
343	13	264.622	208.207
343	14	265.447	207.916
343	15	265.567	208.666
343	16	265.215	209.002
343	17	263.611	208.308
343	18	264.54	206.323
343	19	264.553	205.879
344	11	198.147	217.553
344	12	195.371	217.276
345	11	292.786	232.63
345	12	291.6	232.391
345	13	291.631	235.244
345	14	293.394	237.1
345	15	293.304	236.598
345	16	294.138	238.437
345	17	293.776	240.622
345	18	295.159	241.48
345	19	295.702	241.475
345	20	295.125	242.016
346	11	190.652	234.019
346	12	190.366	232.804
347	11	68.894	238.939
347	12	68.489	238.809
348	11	208.724	242.444
348	12	209.766	242.926
348	13	209.361	243.61
348	14	209.957	245.467
349	11	218.835	248.589
349	12	218.601	248.71
350	11	178.238	355.839
350	12	178.206	355.301
351	11	181.193	377.723
351	12	180.812	377.157
352	11	337.278	384.745
352	12	338.173	384.024
352	13	337.689	384.903
353	11	177.129	392.036
353	12	177.444	391.897
354	11	187.814	486.576
354	12	187.689	487.215
355	12	412.835	9.793
355	13	411.758	10.685
355	14	411.927	10.624
355	15	411.96	11.099
355	16	411.967	10.438
355	17	411.909	9.869
355	18	411.869	10.689
355	19	411.732	10.708
355	20	412.031	10.036
355	21	412.439	9.547
356	12	388.443	24.469
356	13	385.759	24.209
356	14	383.514	24.891
356	15	384.376	24.734
357	12	135.766	36.657
357	13	137.529	37.088
357	14	138.649	35.536
357	15	139.159	35.418
357	16	138.564	37.145
357	17	136.625	37.378
357	18	136.918	38.426
358	12	133.665	90.206
358	13	134.801	88.482
359	12	336.682	92.741
359	13	337.49	90.217
360	12	119.871	107.683
360	13	118.908	108.654
360	14	119.647	108.056
360	15	118.611	110.131
361	12	330.265	116.732
361	13	331.967	117.175
362	12	302.439	117.844
362	13	301.819	118.27
362	14	301.101	118.759
362	15	300.805	119.67
362	16	300.559	119.963
363	12	336.047	125.297
363	13	336.591	123.632
363	14	337.608	122.417
363	15	337.85	122.152
363	16	337.973	123.456
363	17	338.54	125.521
363	18	339.062	126.206
364	12	328.188	128.765
364	13	327.523	129.364
364	14	326.46	128.033
364	15	326.619	126.486
364	16	327.017	127.508
365	12	118.489	134.238
365	13	118.579	134.21
365	14	118.42	134.267
365	15	118.567	134.671
365	16	118.794	133.999
365	17	118.413	134.336
365	18	118.328	134.649
365	19	118.487	134.41
365	20	118.012	134.244
365	21	118.702	134.356
365	22	117.925	134.098
365	23	118.461	134.394
365	24	118.342	133.976
365	25	118.051	134.118
365	26	118.675	133.843
365	27	118.247	134.808
365	28	118.484	134.363
366	12	242.728	141.795
366	13	242.088	139.716
366	14	242.318	139.732
366	15	242.839	140.691
366	16	242.302	141.195
366	17	244.187	143.337
367	12	299.451	217.131
367	13	299.244	216.768
367	14	301.218	216.906
367	15	300.41	215.686
367	16	300.507	217.214
367	17	300.476	217.074
368	12	115.509	223.177
368	13	115.891	222.599
368	14	115.503	223.485
369	12	167.857	228.211
369	13	168.874	230.073
370	12	313.732	268.207
370	13	313.573	268.42
370	14	313.4	267.835
371	12	221.733	317.232
371	13	221.517	318.056
371	14	221.265	317.425
371	15	222.294	315.38
371	16	222.52	318.32
371	17	222.824	318.167
372	12	223.485	329.633
372	13	224.294	328.549
373	12	175.923	368.128
373	13	177.52	366.099
374	13	389.32	2.922
374	14	389.774	2.87
374	15	389.355	3.015
374	16	389.831	2.726
374	17	388.716	3.248
374	18	387.801	4.421
375	13	306.202	22.606
375	14	306.219	22.593
375	15	305.978	22.867
376	13	235.577	28.184
376	14	236.424	28.301
376	15	236.397	28.419
376	16	236.632	28.05
376	17	236.092	28.322
376	18	236.443	28.781
376	19	236.177	28.441
376	20	236.159	27.955
376	21	236.34	28.146
376	22	236.305	28.498
376	23	236.64	28.448
377	13	126.272	50.013
377	14	126.472	49.852
377	15	126.303	50.281
377	16	126.395	49.967
377	17	126.394	50.068
378	13	205.726	56.488
378	14	205.77	56.783
378	15	205.888	56.751
378	16	205.747	56.749
378	17	205.724	56.499
378	18	205.636	56.4
379	13	143.928	61.508
379	14	144.59	62.192
380	13	306.237	76.965
380	14	306.089	76.917
380	15	306.376	76.773
380	16	306.189	76.919
380	17	306.499	76.908
380	18	306.215	76.924
380	19	306.003	76.669
381	13	212.998	118.538
381	14	214.455	120.243
381	15	215.869	119.518
381	16	215.864	119.908
382	13	292.859	128.72
382	14	292.962	128.646
382	15	291.9	128.49
382	16	292.277	129.352
382	17	294.545	130.23
382	18	293.662	129.373
382	19	293.833	130.028
382	20	293.987	130.602
382	21	293.918	130.721
382	22	292.411	130.538
382	23	292.741	130.649
382	24	292.84	130.179
382	25	293.157	130.291
382	26	292.622	130.367
382	27	293.328	130.204
382	28	292.826	130.741
382	29	294.281	130.027
382	30	292.756	130.477
383	13	202.555	137.771
383	14	201.351	137.527
383	15	201.655	138.276
383	16	200.188	137.744
383	17	199.265	136.879
383	18	197.825	136.461
383	19	197.699	137.103
383	20	198.705	137.495
383	21	199.576	137.617
383	22	199.881	138.447
383	23	199.288	138.363
383	24	198.832	138.325
383	25	199.211	137.955
383	26	201.131	139.007
383	27	201.782	139.734
383	28	201.99	141.632
383	29	200.325	140.469
383	30	199	140.22
383	31	198.929	140.337
383	32	199.786	140.631
383	33	201.827	140.708
383	34	203.626	140.199
383	35	202.615	141.546
383	36	203.229	142.2
384	13	276.988	150.245
384	14	276.39	151.162
385	13	254.091	151.132
385	14	254.138	151.219
386	13	274.328	176.01
386	14	277.186	176.658
386	15	277.455	176.174
387	13	338.385	188.597
387	14	337.74	188.186
387	15	336.442	188.288
387	16	337.65	186.042
387	17	339.084	186.171
387	18	341.786	185.295
388	13	265.709	189.335
388	14	266.701	189.514
389	13	164.746	193.857
389	14	165.439	192.688
389	15	166.27	191.792
390	13	344.488	194.686
390	14	345.952	196.549
390	15	344.469	195.73
390	16	342.221	195.396
391	13	68.624	205.821
391	14	68.903	206.206
391	15	69.062	205.661
392	13	228.899	224.387
392	14	228.717	224.493
392	15	230.356	224.542
392	16	228.783	224.661
392	17	229.027	225.754
392	18	229	225.704
393	13	341.148	238.327
393	14	342.447	238.511
394	13	250.009	259.862
394	14	249.624	259.496
395	13	276.661	290.442
395	14	277.368	290.056
395	15	276.494	290.322
395	16	277.092	289.778
395	17	277.01	290.875
395	18	276.742	290.052
395	19	276.928	290.531
395	20	277.424	290.379
395	21	277.132	289.828
395	22	276.756	289.631
395	23	276.983	290.095
395	24	276.784	290.172
395	25	276.801	290.356
395	26	276.708	290.213
395	27	277.092	290.173
395	28	277.197	289.959
395	29	276.982	290.3
395	30	277.038	290.214
395	31	276.452	290.506
395	32	276.988	290.171
395	33	276.826	289.836
395	34	276.852	289.88
395	35	276.892	290.383
395	36	276.634	290.241
395	37	276.739	290.374
395	38	276.709	289.604
395	39	277.419	289.473
395	40	277.221	290.544
395	41	276.568	290.051
395	42	276.583	289.964
395	43	276.952	290.449
395	44	276.637	290.544
395	45	276.922	290.12
395	46	276.683	290.119
395	47	276.794	289.806
395	48	276.899	290.682
395	49	277.387	290.386
396	13	153.995	302.668
396	14	154.178	302.326
397	13	174.41	354.787
397	14	173.959	357.131
397	15	172.988	357.149
397	16	174.329	355.394
397	17	175.583	354.5
398	13	198.834	380.851
398	14	198.651	380.794
399	13	101.902	442.261
399	14	101.665	442.28
399	15	101.696	442.317
400	13	166.492	473.214
400	14	166.618	473.189
400	15	166.459	473.726
400	16	166.242	473.715
400	17	166.289	473.514
401	14	401.565	1.746
401	15	402.2	1.442
401	16	401.828	1.562
401	17	400.858	0.91
401	18	401.977	1.269
401	19	404.612	1.012
401	20	403.239	2.54
401	21	401.78	3.049
402	14	382.495	5.808
402	15	383.853	7.494
403	14	372.308	11.55
403	15	371.577	10.276
403	16	371.523	10.396
403	17	373.237	11.52
404	14	380.547	28.801
404	15	377.766	28.764
404	16	377.97	26.932
404	17	377.437	27.162
405	14	138.737	51.154
405	15	137.879	50.493
405	16	138.127	50.634
405	17	137.999	50.521
405	18	138.088	50.538
405	19	138.914	50.567
405	20	138.438	51.163
405	21	138.314	51.349
406	14	129.008	58.232
406	15	129.897	55.997
406	16	127.857	55.461
406	17	129.067	55.594
406	18	129.065	53.161
406	19	131.225	53.562
406	20	133.05	55.079
406	21	134.157	56.688
406	22	134.278	55.969
407	14	324.706	104.57
407	15	323.692	103.024
407	16	323.916	104.685
407	17	324.894	105.061
407	18	324.888	104.695
408	14	350.606	104.351
408	15	351.571	101.817
408	16	351.717	100.961
408	17	349.864	100.866
409	14	137.68	117.45
409	15	138.016	117.762
409	16	136.946	117.65
410	14	253.533	123.375
410	15	253.3	124.271
410	16	253.126	124.169
410	17	252.994	124.366
410	18	253.039	124.032
410	19	253.293	124.374
411	14	171.731	131.784
411	15	171.979	131.707
412	14	235.723	168.663
412	15	236.94	170.6
413	14	268.291	172.014
413	15	269.456	172.944
413	16	268.715	173.216
414	14	354.48	171.515
414	15	354.09	171.237
414	16	354.416	171.696
415	14	287.486	191.741
415	15	285.37	192.306
416	14	279.498	219.314
416	15	280.098	218.074
416	16	279.983	216.767
416	17	280.031	217.52
416	18	279.287	216.844
416	19	279.275	218.443
416	20	278.47	218.979
416	21	278.949	218.505
416	22	279.348	216.786
416	23	278.621	216.354
417	14	156.49	221.359
417	15	157.079	221.743
418	14	214.397	221.169
418	15	212.746	220.827
419	14	398.528	242.664
419	15	398.469	242.827
420	14	218.365	246.985
420	15	218.45	245.48
421	14	179.671	258.092
421	15	178.881	257.206
422	14	225.857	262.026
422	15	225.698	260.597
423	14	222.628	282.458
423	15	223.494	281.891
423	16	222.475	281.391
424	14	190.546	367.294
424	15	191.212	366.171
[truncated: 3,174 more rows]
