# Supplementary material for: Discrete spatial organization of TGFβ receptors couples receptor multimerization and signaling to cellular tension
Source: eLife journal article supplement (doi:10.7554/elife.09300), 2015-12-10
Supplement: supp [file Figure 2 Source data.xlsx]

## Sheet: FIG 2C
FIGURE 2C, Track Frequency
TBRI			TBRII
Duration (frames)	Frequency		Duration (frames)	Frequency
4	82366		4	78597
8	9104		8	9346
12	2743		12	2843
16	1191		16	1231
20	557		20	639
24	329		24	314
28	203		28	186
32	120		32	126
36	69		36	68
40	58		40	57
44	26		44	40
48	32		48	20
52	22		52	17
56	18		56	16
60	19		60	6
60 +	93		60 +	62

## Sheet: FIG 2F
FIGURE 2F, Diffusion Coefficient														Anova: Single Factor								t-Test: Two-Sample Assuming Equal Variances					t-Test: Two-Sample Assuming Equal Variances
WHOLE CELL		Cell-wide		ROI		ROI-wide		TBRI Whole	TBRII Whole	TBRI FA-rich	TBRI FA-rich			SUMMARY									TBRI Whole	TBRI FA-rich				TBRII Whole	TBRII FA-rich
TBRI				TBRI				0.000510161	0.00148715	0.0311307	0.116755			Groups	Count	Sum	Average	Variance				Mean	0.119831	0.0871345			Mean	0.0987084	0.0841391
	Mean	0.119831			Mean	0.0871345		-0.0181125	0.069298	0.000199249	0.0318188			TBRII Whole	92034	11028.5	0.119831	0.0335816				Variance	0.0335816	0.0234851			Variance	0.0260724	0.0218161
	SEM	0.000604055			SEM	0.0027891		0.0735146	0.603995	0.00860343	-0.0620149			TBRII Whole	158105	15606.3	0.0987084	0.0260724				Observations	92034	3019			Observations	158105	3660
	N	92034			N	3019		0.582148	0.141435	0.394021	0.00198849			TBRI FA-Rich	3019	263.059	0.0871345	0.0234851				Pooled Variance	0.033261				Pooled Variance	0.0259761
								-0.000615742	0.0206557	0.0492334	0.196928			TBRII FA-Rich	3660	307.949	0.0841391	0.0218161				Hypothesized Mean Difference	0				Hypothesized Mean Difference	0
TBRII				TBRII				0.234094	-0.0421627	0.154467	0.212592											df	95051				df	161763
	Mean	0.0987084			Mean	0.0841391		0.0606552	0.0323947	0.000699431	0.0688782											t Stat	9.69294				t Stat	5.40659
	SEM	0.000406086			SEM	0.00244145		0.112117	-0.000265734	0.155456	0.198835			ANOVA								P(T<=t) one-tail	1.65426e-22				P(T<=t) one-tail	3.21639e-08
	N	158105			N	3660		0.00351076	-0.00252212	0.018843	0.218862			Source of Variation	SS	df	MS	F	P-value	F crit		t Critical one-tail	1.64487				t Critical one-tail	1.64486
								0.00662299	-0.00278162	0.0081148	0.00697126			Between Groups	28.8341	3	9.61135	335.213	2.86744e-217	2.60494		P(T<=t) two-tail	3.30852e-22				P(T<=t) two-tail	6.43277e-08
								0.172301	-0.000215854	0.588517	0.197643			Within Groups	7363.47	256814	0.0286724					t Critical two-tail	1.95999				t Critical two-tail	1.95998
								0.156037	-0.0169388	0.104819	0.131868
								0.0359524	0.00108637	0.0305535	0.100182			Total	7392.3	256817
								0.00950575	-0.00876354	0.128346	0.0564806
								0.29249	0.0777491	0.215577	0.33023
								-0.00285754	0.00119299	0.184842	0.0133002
								0.00265723	0.119827	0.336448	0.154943
								0.0012025	-0.00247041	0.224466	0.0654753
								0.123163	0.00344322	0.0676813	-0.00249359											reject null hypothesis					reject null hypothesis
								0.00736042	0.0138026	0.0596351	0.00592431											p < 0.001					p < 0.001
								0.202922	0.09354	0.227572	0.00860877
								-0.00049367	0.234189	0.237248	0.242777
								0.0456708	0.169338	0.111871	0.0695476
								0.0322548	0.234786	0.177169	0.340535
								0.0311307	0.00492749	0.0554573	0.149415
								0.000199249	0.0174962	0.0362024	0.219467
								0.0644884	0.152359	0.094717	0.157664
								0.585788	0.0186285	0.00785471	0.173861
								0.0983205	0.858211	0.433973	0.149554
								-0.000333939	-0.00409518	0.0549644	0.149207
								0.00829922	0.227403	0.204758	0.00840145
								0.0197718	0.0408467	0.0642167	0.00799254
								-0.00500997	0.000794911	0.147197	0.0220493
								-0.000716465	0.113258	-0.00672528	0.0054747
								0.0286338	0.0297771	0.0512352	0.121638
								0.0611642	-0.000702837	0.400106	0.0894647
								0.00497866	2.04694e-05	0.146581	-0.00271267
								0.12478	0.0151698	0.312951	0.00563853
								0.320415	-0.000179525	0.752202	0.323196
								-0.00576644	0.376162	-0.0593931	0.0365804
								-0.007327	0.169606	0.000475541	0.000391839
								0.014654	-0.0404351	0.299961	0.0028906
								0.0876635	0.00205497	0.00378373	0.459224
								0.0308635	0.0710418	0.154991	0.00415066
								-0.0017201	0.0141539	-0.00657107	0.277557
								0.140385	0.144866	0.0584622	0.145662
								0.216139	0.00180584	0.000383901	0.387031
								-0.00666214	0.0365175	0.102421	0.185517
								0.224328	-0.00701109	0.0441236	0.0623479
								0.240426	0.215656	0.426541	-0.00146844
								0.172648	0.15108	0.172394	0.00272107
								0.194096	0.000409593	0.409827	0.00125603
								-0.00107895	0.0236978	-0.00216114	-0.0949687
								-0.00911194	0.391898	-0.00337492	0.182981
								0.0168898	0.116755	-0.00618021	0.198439
								0.0183628	0.00440501	-0.00647232	0.0623949
								0.00860343	0.405308	-0.0124522	0.197682
								-0.0385149	-0.0430733	0.0231744	0.000814545
								0.00355254	0.0885833	0.132429	0.231166
								0.0182468	0.0410885	0.0910233	0.524346
								0.0123311	0.0307281	0.445978	0.183655
								0.00192877	0.0251777	0.170238	0.368599
								-0.0217974	0.712551	0.0749509	0.204625
								0.0198636	0.11211	-0.0443739	0.231884
								0.0104203	-0.000902331	0.0548745	0.180093
								6.05608e-05	0.0827879	0.00122542	0.1474
								0.300357	0.148699	-0.000903282	0.00107856
								0.00234017	-0.00371575	0.0174011	0.548984
								0.104661	0.0104094	-0.0127569	0.0631236
								0.161133	0.0144872	-0.0142405	0.213811
								0.00875945	0.0179806	0.119599	0.33655
								0.146746	0.0540698	0.0481807	0.032945
								0.0123056	0.0906414	0.461605	-0.0145489
								0.112734	-0.00741693	0.0337843	0.24283
								0.0278828	-0.0161858	0.447764	0.283177
								-0.00113377	0.191975	0.0637793	0.00506145
								-0.0320811	0.00123003	0.20031	0.0202481
								0.00650537	-0.00467287	0.35771	0.031609
								0.109511	0.0932797	0.00979115	-0.00173217
								-0.00526492	0.0398622	0.000163396	0.00238071
								0.00676035	-0.00277346	0.0176649	0.053063
								-0.0422339	0.027976	0.0149476	0.00204838
								0.0121179	-0.000593807	-0.070597	0.100177
								0.332071	0.0495442	-0.00221897	0.171878
								0.424899	0.00180523	0.240999	-0.0511552
								0.354727	0.0758866	0.11676	0.257689
								0.0444436	0.00223598	0.264634	0.0272847
								0.664327	0.279551	-0.0021417	1.03644
								0.5947	0.22534	0.00739902	0.691488
								0.00105486	0.0079828	0.23559	0.000211534
								0.0215827	0.393546	0.25999	0.049807
								0.00896518	-0.00363699	0.49414	0.372435
								-0.00807248	0.561798	0.129302	-0.000646076
								0.110642	-0.00331855	-0.0080123	0.108225
								-0.00341305	0.344866	0.289697	0.12961
								-0.0653741	0.0704096	-0.000685794	0.177746
								0.00362643	-0.00503711	0.239533	0.134017
								0.137713	0.209071	0.103401	0.00346825
								0.284146	0.0369841	-0.00176805	-0.00274002
								0.116798	0.314675	0.00887333	0.163798
								0.0244609	0.170636	0.133383	0.026968
								-0.00578939	0.153202	-8.91388e-05	0.349759
								0.317493	0.279165	0.0741782	0.051407
								0.657579	0.0283315	-0.00102814	0.00377517
								0.0950867	0.000716585	0.000563199	0.167685
								0.607604	-0.0241052	0.00307197	0.226862
								-0.028861	0.0318188	4.8503e-05	-0.00122814
								-0.0389211	0.000413707	0.00328352	0.011838
								0.141755	-0.000737065	-0.00487715	0.0228561
								-0.00385437	-0.00211104	0.190637	0.0012241
								0.129104	0.0114953	0.172348	0.0638874
								0.709954	0.132715	0.271549	0.0157521
								0.316406	0.000729654	0.00197347	0.0223577
								0.292817	0.355596	-0.000903835	-0.00250859
								-0.0171969	0.00249997	-0.00915403	-0.000124495
								-0.00219525	0.000977313	0.00475535	0.153314
								0.0409429	0.00352668	-0.000504993	0.0109365
								0.8135	0.0446182	-0.000739922	0.00751139
								0.491145	0.0847074	0.00114169	0.0643894
								0.0800326	0.0016852	0.0265853	0.250686
								0.00283901	0.0650209	0.00325299	0.0879041
								-0.000439696	-0.0067008	-0.00227335	0.00182644
								0.0140008	0.0385613	0.0105498	0.00948956
								0.603942	0.122032	-0.00392278	0.0505633
								8.0202e-05	-0.0071082	0.700817	0.134815
								0.00234625	-0.0127222	0.0330223	0.247303
								-0.000972539	-0.0620149	0.159131	0.00221195
								0.00517966	0.306212	0.176876	0.0220299
								0.0277271	-0.000732996	0.027111	0.336689
								0.102367	0.0424234	0.285925	0.0266378
								0.00466099	0.000200305	-0.0103469	0.444809
								0.180386	0.0140727	0.0478322	-0.0037647
								0.0524728	0.130527	-0.0132233	0.18129
								0.394021	0.814763	0.00817275	0.00758873
								0.000501179	0.00193687	0.0054221	0.00316386
								0.00106609	0.00198849	0.375592	-0.0529026
								0.106114	0.00435709	0.000994023	0.248203
								0.366934	0.187566	0.254345	0.0259252
								-0.0142954	0.157185	0.0296895	0.0609138
								-0.000236288	-0.0033806	0.00554088	0.00139938
								0.00825551	0.0276225	0.0632125	0.282241
								0.0611132	0.0198208	0.0359731	0.000109272
								-0.0752973	0.084199	0.0114321	0.0023
								0.0952552	0.379669	0.000605282	0.158023
								-0.000755693	0.0143936	-0.00228127	-0.00126219
								-0.0181899	0.196928	0.0146912	-0.00369576
								0.0225299	0.0806443	0.16919	-0.00326986
								0.00432665	0.00211957	0.435871	0.0587048
								0.127746	0.37503	0.0474441	-0.000283618
								0.346996	-0.00339208	-0.00868205	0.00195956
								0.0572225	0.0786741	-0.00209482	-0.00486986
								0.0018555	0.0692612	-0.00450747	-0.00241464
								0.000481464	0.0116763	0.252105	0.0426002
								0.459472	0.03624	0.324278	-0.00242688
								0.0717893	0.0147794	0.00344539	0.000553513
								-0.00121881	0.0177671	0.163733	0.334352
								0.0492334	0.00889756	0.382447	0.0269304
								-0.00122062	-0.00516376	0.0219188	0.0322966
								0.0449281	0.212592	-0.000214926	-0.000976229
								0.013312	0.0734403	-0.000760122	0.00207552
								0.371985	0.0534623	0.0155095	0.037099
								0.0454065	0.233877	0.659471	0.000129042
								-0.00761389	0.00653551	0.0387849	0.00361172
								-0.00141553	0.554288	0.00400737	0.376622
								0.108418	0.00303808	0.0130022	0.0655322
								-0.0044704	0.332625	0.00555031	0.000263783
								-0.0248259	0.296165	0.00157812	-0.00109583
								0.136602	0.00557755	0.209157	0.00506887
								0.255421	0.445272	0.0674629	0.000776038
								0.0915857	0.0541789	0.129824	0.00092775
								0.0353292	0.0688782	0.162419	0.016429
								0.144162	0.198835	-0.0330074	0.00101007
								0.0855437	0.00103879	0.00435489	0.0585318
								0.0345398	0.0198332	0.00465858	0.119817
								0.560511	0.151847	0.165311	0.0184588
								0.000867143	0.0315393	0.937214	1.00237
								0.0442641	0.110668	0.0594058	0.0629277
								0.480172	0.00146716	0.36576	0.182908
								0.00356564	0.171087	-0.0302459	-0.00101959
								-0.00210016	0.173854	-0.0245635	0.0013825
								-0.00147057	0.0212133	0.156154	0.00311293
								0.346781	0.00300384	0.0306004	0.0368899
								0.14731	0.0264813	0.392726	0.121318
								0.437855	-0.000396954	-0.00606446	0.0639821
								-0.00728389	0.0665055	0.169587	0.0599455
								0.105286	0.0682822	-0.00097138	-0.0535317
								0.0119134	0.0223797	0.0415927	0.730039
								4.35607e-05	0.00711136	0.00134391	0.273934
								0.154467	0.00196787	-0.00154214	0.583749
								0.0197222	0.00424832	-0.000203388	0.0474534
								0.0408591	0.000252998	0.000233549	0.185496
								0.288028	0.908122	0.00110583	0.209291
								0.00673906	0.0815484	-0.00018519	0.0709238
								0.0179888	0.218862	-0.01128	-0.0157735
								0.521905	0.0585791	0.56611	0.0485805
								0.152712	0.0884886	0.167849	0.184076
								0.351661	0.00697126	0.0645351	0.0378564
								-0.00147061	-0.0345326	0.150099	0.0817262
								0.397913	0.197643	0.139371	0.266657
								-0.0360591	-0.000991304	-0.000686825	0.641538
								0.125007	0.00451545	0.000689247	-0.0270711
								-0.0183747	0.355368	-0.0142871	0.711475
								0.254959	0.0360798	0.113198	0.151322
								0.37179	0.175106	-0.00439898	0.00242256
								0.433524	0.00290697	0.0378343	0.169317
								-0.0337664	0.100477	0.0131093	0.0648141
								0.313613	0.131868	0.339468	0.0893901
								0.195998	0.0582956	0.318832	0.0470895
								0.194398	0.00337873	0.0834637	0.396195
								0.12816	0.144216	0.0173346	0.0486887
								0.000324463	0.124782	0.0107175	0.00346693
								0.214608	-0.0604517	0.00545331	0.0566906
								-0.00291029	0.00155225	0.0148014	0.372139
								0.0347519	0.409132	0.0141712	9.79501e-05
								0.0322381	-0.0123102	0.0498424	0.636051
								0.00749514	-0.00372702	0.0480812	0.0498798
								0.00427406	0.031011	0.253447	0.0440713
								0.333261	0.0852948	0.300709	-0.0255276
								0.0157293	0.173649	0.0693174	0.0725687
								0.324825	0.00227072	0.0706477	0.020725
								0.050409	-0.0142513	0.12252	0.210092
								0.0429141	-0.0451711	0.00783943	-0.00284684
								0.0976552	0.526066	0.00195351	0.000748562
								0.198405	0.00390464	0.0177958	0.0143661
								0.228815	0.105299	0.160441	0.00435899
								0.701	0.00457599	0.130953	0.766993
								0.164412	-0.0268921	0.0703405	0.00200064
								0.416336	0.0415868	0.00728921	0.125109
								0.0521449	0.282405	-0.0134123	0.0135085
								0.0329142	0.0668589	0.00755373	0.291815
								0.0442707	0.0023357	-0.00172267	-0.0295982
								-0.00159583	-0.00398017	-0.0158864	0.0527663
								-0.00560611	0.100182	-0.00910849	0.703063
								0.0120618	0.154959	0.01625	0.0169478
								0.00191248	0.00290464	-0.00127941	0.108859
								0.00120396	0.148445	0.00429716	0.00873016
								0.0016581	8.99218e-05	0.455988	0.202121
								0.537435	0.00520174	0.00936978	0.367354
								-0.000148527	0.0710589	0.216384	0.382507
								-0.00941954	0.391386	0.0024835	0.310851
								0.0895821	0.57582	-0.00180418	-0.0350101
								0.00200491	0.228791	-0.000709677	0.0979015
								0.344451	0.0564806	0.0380403	0.181232
								0.246595	0.0533073	0.00425579	-0.00498653
								-0.00220098	0.186309	0.00178883	-0.102815
								0.0658175	0.0891288	0.00549357	0.00999929
								0.0764445	-0.00880573	-0.00573446	0.217262
								-0.00110379	0.00643523	-0.0112862	0.215962
								0.0837227	0.240733	0.0323221	0.520183
								0.0929083	0.01089	0.000950271	0.00245173
								0.0532534	0.52064	0.131705	0.43852
								-0.00076724	0.0103923	0.717242	0.0911792
								-0.00584766	-0.00192516	0.402268	0.00698286
								0.0514672	0.164953	0.508425	-0.00265926
								-0.000710437	0.136047	0.030702	0.0452489
								0.417607	0.00586127	0.00483364	0.0216122
								0.057433	0.328283	-0.00408341	0.108788
								0.287221	0.155043	-0.000711907	0.136898
								-0.0324279	0.18491	-0.00493603	0.11576
								0.136307	0.0593326	-0.00176112	0.210006
								0.00027017	0.0391827	-0.00215759	-0.0138317
								0.465718	0.00185937	-0.000213911	0.0235955
								0.000509461	0.324863	0.184738	0.0621268
								0.0220674	0.188758	0.00770637	0.102092
								0.00788254	0.118116	-0.00541461	0.0324383
								0.0754708	0.30369	-0.0324744	0.356904
								0.0662453	-0.0182962	0.00453974	0.0670657
								0.97531	0.014219	-0.00993177	-0.026703
								0.752155	0.109378	0.0291183	0.0513278
								0.00787367	0.0013054	-0.0138729	0.0981839
								-0.0349716	0.00886646	0.000535584	0.0495354
								0.1618	0.484911	0.363383	0.00121069
								0.00753134	-0.00106756	-0.0711374	-0.00197519
								-0.00143152	0.131972	0.495506	0.0166826
								0.000699431	2.10205e-05	0.164881	0.01938
								-0.00896621	0.00405276	0.0233421	0.0627499
								0.0670834	0.0309899	0.000671997	0.229656
								0.157871	0.00958745	0.341638	0.00620334
								0.0946121	0.00899431	0.501574	0.127663
								0.00122761	0.322956	0.235511	0.151341
								0.00403664	0.641966	0.000334009	0.235484
								0.0749197	-0.00385641	0.000624187	0.0947049
								0.0944682	0.305548	0.00014703	0.204481
								0.427818	0.562238	0.000283828	0.0102255
								0.0259748	0.00202943	0.000195281	0.0025084
								-0.00321848	-0.00457809	0.0736819	-0.0130245
								-0.0188954	0.214692	0.0284662	0.0195228
								-0.00403069	0.562971	-0.0154223	0.00812387
								0.00366752	0.338519	0.00647995	-0.00597056
								0.118693	0.00695944	-0.00156252	0.00611999
								0.130205	0.0805845	0.00432227	0.018498
								0.142855	-0.00199282	0.00216689	-0.00167862
								0.0186836	0.090911	0.00604301	0.00898624
								0.00406864	0.12108	0.000718877	-0.0055733
								0.507021	-0.011241	0.0842059	-0.00716074
								0.720222	0.0431269	0.22656	0.226857
								0.0215998	0.0270427	0.303055	-0.000944372
								0.0334803	0.33023	0.328794	-0.0129618
								0.363755	0.0133002	-0.0163718	0.0050996
								0.0421847	0.154943	0.273908	0.22432
								0.472874	0.415196	0.276786	-0.0153946
								0.101615	0.452942	0.00254433	0.0476209
								-0.00071335	0.315822	0.0125529	0.16408
								-0.00271453	0.176767	0.0812812	0.0596863
								0.0931776	0.340947	0.00188712	-0.0164253
								0.0188072	0.0468238	0.175973	0.0224792
								-0.00254231	0.00375552	-0.000144044	0.0842619
								0.00972808	0.0305303	0.0345627	0.0163459
								0.0268405	-0.00253401	0.00812505	0.0116296
								0.00108286	0.00198998	-0.0180256	0.0070143
								0.0236609	0.124105	-0.015028	0.112053
								0.047433	0.0284884	-0.00123939	0.0275467
								0.229964	0.00916657	0.213967	0.00273863
								0.524268	0.259258	-0.042392	0.422674
								0.000551627	0.142755	-0.000676903	0.243914
								0.174309	0.25314	-0.00265952	0.321633
								0.0065548	-0.000339998	0.000711418	0.00691487
								0.0534681	0.0654753	0.177478	0.0766792
								0.18652	-0.00249359	0.312207	0.242483
								0.342528	0.00927022	0.216924	0.187233
								-0.0011682	0.0177209	0.0872568	0.009212
								0.00329629	0.117469	-0.00307081	-0.00447047
								0.182785	0.00592431	0.000265323	0.130645
								-0.002948	0.228233	0.158437	-0.0304563
								0.000988988	-0.000240227	-0.00555004	0.000862848
								0.0226027	0.00272589	0.129924	0.116487
								0.0124049	0.198627	0.00241201	0.0609766
								0.400489	0.000730659	0.0104806	0.260183
								0.129506	0.108378	0.0777052	0.0877191
								-0.00037909	-0.000678509	-0.00477684	0.00375757
								0.0281395	-0.0667617	0.104708	0.185819
								0.0395938	0.161924	0.0241007	0.0125486
								0.0875567	0.0540997	-0.000493415	0.0163034
								0.00057314	0.127692	-0.00820375	0.0381229
								0.0192274	0.303346	0.0166841	-0.0010808
								0.43364	0.181992	0.0882642	0.0263736
								0.0198955	0.0112081	0.199934	-0.0389254
								0.00248401	0.104439	0.00162428	0.0872959
								0.0223957	-0.00163503	0.301645	-0.0536485
								0.0371116	0.00330586	0.0836967	0.00524851
								-0.00307474	0.00860877	-0.0266043	0.0139959
								-0.00252308	0.00799679	0.0615208	-0.0357785
								-0.00182112	0.000784166	0.0159423	-0.0267693
								0.102731	0.00538991	0.00357847	0.00658137
								0.501073	0.201519	-0.000358242	0.190059
								0.00298343	0.0697243	-0.000671044	-0.0153616
								-0.0021113	0.0731654	0.0254431	0.0764974
								0.000592421	-0.000440227	0.00580625	-0.00510146
								0.0574366	-0.0138768	-0.00490546	0.0296078
								-0.00281294	0.72564	-0.0176136	0.000227835
								0.00455504	0.258007	0.00113536	0.178553
								0.0449778	-0.000249029	-0.000774846	0.00432089
								-0.00115485	0.989536	0.00373171	0.00650107
								-0.0680722	0.150589	-0.000991896	-0.00066505
								-0.00235638	-0.00684209	0.00321659	0.0023084
								0.0370581	0.345552	0.139436	0.00335523
								0.427873	0.0164806	0.169309	-0.00463665
								0.046729	0.331297	0.335981	0.0306959
								0.264974	0.493979	0.49427	0.558238
								0.887536	-0.00142388	-0.00885427	0.0100747
								0.00182784	-0.00193243	-0.00926999	0.00358172
								0.0043851	0.190974	0.003022	0.00681942
								0.132258	0.0798217	0.00511674	0.00164065
								-0.0220361	0.0255044	-0.0319213	0.0155343
								0.0091423	0.0603055	0.0583416	-0.003119
								0.000859213	0.523077	0.0028927	0.00194962
								0.0559443	-0.00213268	0.316202	0.093128
								0.0230507	0.462491	0.290068	0.0135493
								0.0954175	0.0164059	0.180978	0.141566
								0.147226	0.00292439	0.104577	0.0734321
								0.0592013	-0.000255261	0.10186	0.00441594
								0.0119706	0.00133184	0.241273	0.29612
								0.00690543	0.344873	0.151286	0.00484986
								0.0124024	0.049293	0.0025579	0.0803243
								0.0350273	-0.00883456	-0.0253653	0.476983
								0.00945859	0.000313634	0.0582005	0.000595924
								0.00287082	0.435085	0.0114141	-0.00291484
								0.195564	-0.00341516	0.000411635	0.00513775
								0.742544	-0.00316049	-0.000890139	0.00468872
								1.14473	0.0263079	0.00104147	0.000555945
								-0.00544155	0.0287157	0.0517426	0.0315486
								-0.00984917	0.134289	-0.0113554	0.0695815
								0.195754	0.221383	-0.00253343	0.488339
								0.00100209	0.0540115	0.000285951	-0.00705779
								0.000140455	0.516943	-0.0282272	0.00255347
								0.00482685	0.000990547	0.0108517	-2.86927e-05
								0.320358	-0.0063916	0.000903118	0.00105575
								-0.00104098	0.0617274	0.0256509	-0.00730121
								0.230969	0.123872	0.0163163	6.04623e-05
								0.235944	0.482391	0.0400489	0.0058711
								0.505639	-0.00652184	0.00422001	-0.0005785
								0.115744	0.00245357	0.351185	0.000989243
								0.251644	0.282217	-8.37048e-05	-0.000563498
								-0.000480206	0.242777	0.127601	0.000435906
								0.000233709	0.00272272	0.347512	0.0911774
								0.00676397	0.0946679	0.0337935	0.105772
								0.0023393	0.364363	0.0957374	0.000973567
								-0.00579268	0.00944499	0.00321924	-0.00292416
								0.278708	0.00415298	0.00600857	0.0524387
								0.0210098	0.14013	0.00035321	0.0820235
								0.0125121	-0.00116013	0.100558	0.0877484
								0.00361033	0.0582604	0.130879	0.00671996
								0.061752	0.168649	0.219435	0.000168849
								0.00389139	0.00120335	-0.00771605	0.00474741
								0.0148425	-0.0205281	-0.0118808	0.306993
								-0.00202286	0.0597375	0.185509	0.0152309
								0.04452	0.030391	0.0473138	0.0221691
								-0.00761056	0.28941	-0.000414026	0.0358362
								0.00207291	-0.00252222	0.0116406	0.0435994
								0.168	0.128668	0.00192065	-0.00330523
								-0.00158451	0.0200694	-0.000623883	0.0465999
								0.1977	0.153377	0.000632449	0.737158
								0.992139	0.353388	0.0342711	0.0157979
								-0.0106988	0.152489	8.89808e-05	0.232099
								-0.00689513	0.0415876	0.00296639	-0.0111958
								0.0115811	0.012696	0.00327435	0.0878496
								0.000419158	0.000580001	0.00221536	0.0097617
								0.339334	0.0695476	-0.000428943	0.171763
								0.000798626	0.509426	0.000739066	0.121641
								0.193589	0.218135	-0.00186021	0.0816501
								0.130703	-0.000834064	-0.000716465	0.503357
								0.124082	-0.00475717	6.05608e-05	0.180148
								0.155456	0.127934	0.8135	0.17591
								-0.00386296	0.0329454	-0.000972539	0.758381
								0.121351	0.00481594	-0.000755693	0.623311
								0.401144	0.067358	0.136307	0.14707
								-0.0145357	0.0270796	-0.00896621	0.096191
								0.0665773	0.00283484	0.0186836	-0.00413799
								-0.0023404	-0.00156128	0.00972808	0.136923
								0.174372	0.273391	0.0395938	0.102772
								0.201002	0.00870651	-0.00281294	0.497894
								0.0246009	0.0594612	0.00182784	0.0724808
								-0.000890093	0.177732	0.000859213	-0.000252149
								0.0534905	0.139881	-0.00158451	0.0236058
								0.0811229	0.0497719	0.000419158	0.00365196
								0.269724	0.081681	0.130703	-0.00600971
								0.00126461	-0.00416545	-0.00114258	2.15198
								-0.00114258	0.0310877	0.384457	0.00120301
								0.0952885	0.164845	-0.00214854	0.168788
								0.0590309	0.467489	0.00054166	0.00035375
								0.182694	-0.00160479	5.83424e-05	0.000202852
								0.251099	0.0338669	-0.00216427	-0.000654036
								0.384457	0.455651	0.174603	-0.000809487
								0.00215473	0.0124639	0.07621	0.00149135
								0.0790661	0.0283855	-0.00410212	0.0217448
								-0.00979472	-0.00651665	0.157221	-0.000551417
								0.000168582	0.194886	-0.0196676	0.132028
								-0.0011651	-0.00329579	0.000292407	0.173342
								0.00192473	0.510131	0.000368123	0.0122669
								0.018843	-0.00290596	0.361875	0.169376
								-0.00294953	-0.0607113	0.0094146	0.0615826
								-0.00214854	-0.00685222	0.119714	0.000512627
								-0.0255289	0.0353457	-0.0297903	0.0181575
								0.00496414	0.0154134	0.0020881	0.00229364
								0.0309034	0.000212538	0.115635	0.00035478
								0.348839	0.00603022	0.152361	-0.000230048
								0.0122496	0.0416363	0.0345134	0.00698895
								0.0566778	-7.75754e-05	0.175369	0.00148606
								-0.0469897	0.418118	0.116781	-0.00242769
								0.121137	0.193805	0.844477	-0.00107755
								0.206505	0.0169302	0.0427266	0.00136376
								0.00054166	0.0941332	0.0747734	0.00226675
								0.34745	0.398915	0.0751413	0.121901
								0.437274	-0.00515282	0.417466	-0.0147667
								0.204623	0.0723375	0.0753022	-0.00811829
								-0.000844296	-0.00767632	0.0963124	0.0864766
								0.00145234	0.125657	0.0779717	0.000993702
								0.144582	0.00221428	0.0162682	-0.0226074
								0.599511	0.173569	-0.0349883	0.00254226
								0.153498	0.023955	0.0679028	-0.00152962
								0.0337825	0.148557	0.162817	0.0162576
								0.00751097	0.000784381	0.110818	0.00464354
								0.0592564	0.697236	0.000373508	0.00710318
								0.00482547	0.0951755	0.176393	0.0089255
								0.0205661	0.00440928	0.0170814	-0.00203064
								0.0842826	-0.00204135	0.000862283	0.000962158
								4.13821e-05	0.162441	-0.00508968	0.00200551
								5.83424e-05	-0.000628364	0.517538	0.0554814
								0.471251	0.142008	0.0017186	0.0101825
								0.0137004	0.00498853	-0.0196899	0.06156
								-0.000510619	0.323972	0.000542226	0.065282
								-0.0480342	0.0903472	0.0229387	-0.0364501
								0.0182291	0.0647577	-0.00595366	0.00292725
								0.0028152	0.00550778	0.0574418	0.00159871
								0.0466433	0.00166	0.130657	1.3031
								0.00773705	0.000200943	-0.0743442	0.00186414
								-0.00165407	-0.00115818	0.0291098	0.00144665
								0.32262	0.0174445	0.0301204	0.00118168
								0.336745	-0.0033763	0.000334265	-0.00927536
								0.00267222	0.00795364	-0.00511099	0.000183723
								0.0200142	0.0025077	0.00839322	-0.000145134
								-0.00675242	0.175441	0.176868	0.000852904
								0.343787	0.0964318	-0.00101364	0.00170266
								-0.00228006	0.0119668	0.000136258	-0.00084638
								-0.00714047	0.0198247	-0.00845099	0.00489126
								0.361874	0.117301	-0.00995636	0.00823152
								0.860481	0.0312375	-0.00272961	-0.0091012
								0.233432	0.0168173	-0.00380624	0.0162615
								0.0156207	0.0147057	0.134693	0.00376422
								0.522282	0.00319199	0.00136808	0.0442818
								0.0016129	0.000407644	0.000229262	0.327819
								0.00174614	0.149847	0.0105934	0.158544
								-0.0129661	0.162414	0.000163916	0.161505
								0.369768	0.0115572	0.101048	-0.0184107
								0.0166225	0.00350157	-0.0368452	1.29765
								0.0146521	-0.00595505	-0.00222236	0.199754
								0.655124	0.317415	-0.0017526	-0.0579791
								0.155829	-0.015148	0.00106025	0.48898
								0.0220013	0.0290061	0.511496	0.0214038
								0.0167296	0.0466935	0.00138811	0.190433
								0.179786	0.340535	0.0208412	-0.0550477
								0.00117511	0.0489078	0.117597	0.354774
								0.010428	0.314123	0.0056944	0.178573
								3.44358e-05	0.558811	0.00368165	0.220819
								0.0162585	0.0946226	0.000440521	-0.00504456
								0.118951	0.0367245	0.00105576	0.127684
								0.000347106	0.0016709	-0.00364705	0.0023857
								0.144771	0.0286586	0.00392746	0.000745158
								0.413109	0.0445083	-0.00322796	0.127495
								0.0226968	0.498216	0.330946	0.0103241
								0.121727	0.00114225	0.00303808	-0.0930866
								0.147181	0.0122799	0.0949464	0.0144889
								0.0177305	0.00146732	0.0024405	0.0999773
								0.00977575	0.233354	-0.00303061	0.00859192
								0.00878416	-0.0011412	0.00195514	0.0261534
								-0.00216427	0.0176181	0.000937759	0.107634
								0.131892	-0.00890299	-0.00214219	0.00341664
								0.000943068	-0.00318784	0.0310554	0.807683
								0.0081148	0.199727	-9.14443e-05	0.0649463
								0.11704	-0.00209616	0.00213938	0.0462597
								-0.00217182	0.0505106	0.0382128	0.00189474
								0.0576352	0.00447024	0.00454978	0.496568
								-0.0256721	0.0469401	0.143744	0.0304939
								0.187904	0.56899	-0.0279986	0.0273685
								0.335278	0.205013	0.0427951	0.0925162
								0.124553	0.127022	-0.0154471	0.679068
								0.0997897	0.0623244	0.0028583	0.0680386
								0.0953481	0.152202	0.166236	0.0237196
								-1.92867e-05	0.176908	0.624329	0.0173089
								0.00180933	0.0773407	0.000465083	-0.0167607
								0.00610578	0.137223	0.00205308	0.0135022
								0.311748	-0.0039047	-0.0742764	0.598962
								0.0805371	-0.000733727	0.152863	0.0550311
								0.309442	0.03324	0.253266	0.0177944
								0.502751	0.211725	0.043503	0.0856318
								-0.0353199	0.143036	-0.0117857	0.00321752
								0.0641386	0.551584	-0.00244732	-0.0213902
								0.0392371	0.000871453	0.0164285	0.151462
								0.0351287	-0.00512401	-0.0105523	0.0123773
								0.0784572	0.0144633	0.0590824	0.0146664
								-0.00428522	0.198977	-0.0198947	0.00780523
								-0.0315032	0.106494	0.00919784	0.061753
								-0.00379027	0.0816837	-0.000536295	0.0247134
								0.0701206	0.208984	0.000859794	0.116001
								0.037681	-0.00038991	-0.00213926	0.187316
								0.00108906	0.00185808	0.000495106	0.300395
								0.332886	-0.00413697	0.00176441	0.20927
								-0.0135803	0.0950384	0.101824	-0.00254503
								0.0537536	0.000257562	0.00317132	-0.035717
								0.381341	0.417405	0.00019626	0.00830446
								-0.00280755	-0.0187503	0.30582	0.765887
								0.0458455	-0.00859207	-0.0100313	0.0996152
								-0.00302146	0.286177	0.00408173	0.136153
								0.465077	0.0431455	-0.000648374	0.14282
								0.189703	0.168526	0.00525327	-0.00072273
								0.0290717	0.289565	0.000229542	0.00198134
								0.174603	0.00275328	0.00491255	-0.000964051
								0.306095	0.149498	-0.00147744	0.0152193
								0.239889	0.00574709	0.0186114	0.0289202
								0.179508	-0.0407049	-0.00363262	0.067016
								0.0878202	0.0327399	0.00214975	0.140231
								0.164586	0.0444636	0.000661738	0.0609009
								0.00185936	0.149415	0.0190829	0.034586
								0.0267285	0.219467	0.153212	0.148999
								0.507304	0.004756	-0.000965102	0.158142
								0.0958049	0.169289	0.00286524	-0.00442669
								0.130918	-0.0214018	0.0936568	0.104997
								0.300022	0.391908	0.000776295	0.0172042
								0.142206	0.046164	0.00231794	0.154714
								0.150066	0.0803988	-0.000310916	0.175917
								-0.00111439	0.133782	0.00273403	0.141427
								-0.0177982	0.0179311	0.00452087	-0.111462
								-0.00277491	0.000870586	0.0833097	0.0919414
								0.00737192	0.0100389	0.00260589	0.00569051
								0.32337	0.087844	0.000170515	0.0702158
								-0.0015846	-0.00348142	0.00350772	0.0052838
								0.00185615	0.222471	-0.01539	0.0374426
								0.000592107	0.242338	-0.00488933	-0.00445403
								0.203191	0.0934056	0.031509	0.186122
								0.00321238	0.00367745	0.406428	0.127484
								-0.0148094	0.440392	0.0786157	0.0274574
								0.11984	0.107188	-0.000126458	0.15409
								0.623571	0.781866	0.0166532	0.110484
								0.0150165	0.00108722	0.21023	0.120004
								-0.00150435	0.0869067	0.00887578	0.192067
								-0.00201916	0.157664	0.425169	0.00406514
								0.00217973	0.113357	-0.00307641	0.0117404
								0.000871082	0.0692077	0.0431523	0.0209201
								0.017287	0.00243534	0.0213072	-0.0117251
								0.319913	-0.0103053	0.0958148	0.382068
								-0.00576982	-0.000412942	0.10014	0.00545307
								1.11428	0.0210979	0.0742725	0.267893
								0.00126925	0.312918	-0.00751978	0.00546766
								-0.00111819	0.319584	0.00734771	0.00974804
								0.236066	0.111889	0.0246091	0.181326
								0.35274	0.315793	0.0255692	0.275846
								0.0389101	0.0367943	0.110052	0.0293578
								0.199565	0.105939	0.00886721	0.0257866
								0.00245717	0.0566162	0.104344	0.0569414
								0.0184531	0.0385225	0.0584636	-0.00731135
								0.000217486	0.0103438	-0.00804792	0.0651512
								0.0767712	0.000143991	0.00240537	0.00184933
								0.095421	0.236932	0.644932	-0.0176932
								0.238585	-0.00113455	-0.0174852	0.264803
								0.0561565	0.141653	0.202801	0.286742
								0.00448374	0.681192	0.130961	0.00196871
								-0.0121824	0.131103	0.000196753	0.0347984
								0.161889	0.173861	0.0186783	0.568099
								-0.00130149	0.164322	0.14222	-0.012502
								0.00354258	0.100109	0.0396062	0.538491
								0.000955623	0.00291388	0.00398511	0.138349
								0.0689588	0.00260469	-0.00370684	0.000553784
								-0.00109172	-0.00817356	-0.00365674	0.00207391
								0.00177626	0.543077	-0.000122615	0.0176936
								-0.0479949	-0.0111176	0.00265287	0.00794765
								0.468949	0.00487171	-0.000165455	0.00235628
								0.0491984	-0.000311857	-0.00350797	0.0149175
								0.0233294	0.652338	0.00999978	0.0344222
								0.000833426	0.096326	0.599066	0.00790742
								0.07621	0.21601	0.00775217	0.0357084
								0.202575	0.0694004	0.000722568	0.0324528
								0.00563155	0.150572	0.0133231	0.0588043
								0.185536	0.0733941	-0.0184617	0.257356
								-0.000669909	0.0977801	-0.00468034	-0.0275099
								0.97945	0.158105	0.104908	0.0442385
								0.000735883	-0.00620437	-0.000558893	-0.0014524
								0.276301	0.0625264	0.0235711	0.416712
								0.000139101	-0.0058577	0.00100643	0.197071
								0.000707065	0.0109416	0.00348766	0.00180806
								0.010517	-0.0142151	-0.00594464	0.041829
								0.121971	0.00535308	-0.000614581	-0.00771034
								-0.00410212	0.137896	0.158588	0.154396
								0.0253093	0.107223	0.0491124	-0.000719884
								0.00144139	0.0188824	-0.00572721	0.0888743
								0.0283961	-0.0201069	0.0906435	-0.0226001
								0.212241	0.500505	0.0126362	0.0177557
								0.157221	0.0613843	0.167512	-0.0308733
								0.00096063	-0.0232457	0.18823	-0.018603
								0.213122	0.00154669	0.00927805	0.275101
								0.00456172	0.0484855	-0.0196534	0.0879188
								0.102058	-0.00159769	0.0338796	0.0660056
								-0.0134923	0.00199354	0.051313	0.283315
								-0.0662849	0.0304107	-0.00416857	6.38779e-05
								0.0752278	0.0104278	0.00396673	-0.00521191
								0.748626	0.530484	-0.00706855	0.00566163
								0.00143467	0.293494	0.337651	0.00431018
								0.19195	0.0176094	-0.000993238	0.0396475
								0.273837	0.0302083	0.012116	0.28335
								0.0105955	0.125737	-0.000795335	-0.0118266
								-0.0196676	0.107589	-0.00459018	0.128454
								0.090848	0.469044	0.0980192	0.0506977
								0.0566373	0.050532	-0.00707744	0.0191837
								0.200341	0.317239	0.142569	0.0548763
								0.00628711	0.00208479	0.110094	0.1394
								0.0481752	0.264928	0.228143	0.265854
								-0.00159023	0.0107287	0.00115441	0.00385987
								0.026496	0.109747	0.114886	0.148863
								0.223446	0.0471694	0.0485958	0.0672168
								0.502797	-0.0987166	-0.0457653	0.0602093
								0.00157575	-0.0316567	-0.00741791	0.0450647
								0.0274966	0.0296493	0.0231473	-0.00296974
								0.00267048	0.14723	-0.00314495	0.014126
								0.00147462	0.011732	0.0273811	0.0181412
								0.668561	0.381571	0.00446122	0.00959283
								0.000738937	-0.0295597	0.0146262	0.0239212
								0.00075102	0.0342794	-0.021037	0.0137567
								-0.000986327	0.26989	0.0795981	0.196549
								0.0869252	-0.00121271	-0.00176835	0.000217991
								0.0634285	-0.0102136	0.0378992	-0.00440614
								-0.00458412	0.189244	0.00305952	0.0101488
								-0.0105834	0.00648381	0.0274081	0.00721142
								0.337472	0.162315	0.00129479	0.0114
								0.000292407	0.134499	0.00114413	0.614375
								0.000473102	0.23699	0.000240169	0.133548
								0.0420849	0.000967519	0.217633	0.0950458
								0.0766977	0.0103089	0.084294	0.050788
								-0.00335989	0.470268	0.102609	-0.00116077
								0.00154088	0.0467292	0.100756	0.00110623
								-0.00594935	0.224789	-0.0018123	0.00427999
								0.319266	0.00338885	-0.0524263	0.00130635
								0.284483	0.181146	-0.000302472	0.0976239
								0.196214	0.0199369	0.00739446	0.0543806
								0.270383	0.463354	0.0467319	0.0952713
								0.051479	0.00922721	-0.0127377	-0.010561
								0.0399151	0.00341638	0.0504309	0.0220576
								-0.00217259	0.183678	0.00717553	0.286684
								-0.00978927	-0.0825944	0.00235966	0.00518174
								0.0383043	-0.00191258	0.084749	0.0300066
								-0.00167373	0.0944242	0.0800619	0.107341
								0.172083	0.429635	0.00394046	0.199054
								-0.0128901	0.102233	0.127603	0.0305851
								0.0526433	0.0711278	0.172419	0.111308
								0.0674427	0.00333751	0.111106	0.510776
								0.000688801	-0.00850848	-0.0049162	0.06576
								1.16512	0.0496676	0.0466049	0.0796399
								0.322358	0.000990503	0.000341628	-0.00255032
								-0.0105527	0.238208	0.0449999	0.121317
								0.274612	-0.000966001	0.143258	0.345883
								0.588517	0.0961907	0.910086	0.0749543
								-9.64634e-05	0.00361391	0.0769241	-0.0134887
								0.253369	-0.0144317	0.0409781	0.0232149
								0.000435624	0.00734504	-0.0442224	0.271413
								-0.000776539	-0.00225655	4.90189e-05	1.22627
								0.104819	0.286582	-0.0251312	0.395516
								0.307696	0.043544	0.240578	0.0465829
								0.815004	0.00123951	-0.00274658	0.5074
								0.00148186	0.545845	0.595799	0.00373495
								0.000643743	0.0154724	-0.0018949	-0.0129633
								0.161374	0.0974127	-0.00103247	0.52934
								0.438571	0.0301909	0.0020703	-0.0217403
								0.0105696	0.100678	-0.000388421	-0.00136159
								0.318525	0.0427115	0.0305011	0.0329686
								0.000558208	0.123812	0.00417544	0.156815
								0.530093	0.104009	0.152647	0.456132
								0.485925	0.0428446	0.375989	0.00063379
								0.362796	0.011411	-0.0190765	0.0036268
								0.000368123	-0.000854512	0.0449433	0.174719
								0.0231703	0.0561436	0.0165751	0.00244178
								0.0305535	0.940991	0.0180685	0.00145463
								0.0498424	0.0436265	-0.00251454	0.0265238
								0.105208	0.0235956	-0.00269327	0.173527
								-0.00118758	0.00265733	-0.0532043	0.00223194
								-0.00114697	-0.0419398	0.0318716	0.000567938
								-8.06927e-05	0.0321935	0.141039	0.107876
								0.00537945	0.239971	0.345986	0.00471047
								-0.00962428	0.15413	0.127136	-0.0148097
								-0.00266265	0.104234	0.1814	0.00379648
								0.0906164	0.0352904	0.230931	0.0898528
								0.0362921	0.00247829	0.261043	0.0720693
								0.0739581	0.149554	-0.0121805	-0.000766714
								0.162696	0.123823	0.0535603	0.0163015
								0.00302996	0.0162639	0.0193365	0.0888383
								0.276329	0.024508	0.00705835	0.0680145
								0.128346	-0.00721064	0.16791	0.00341401
								0.00377817	0.000425212	0.124718	0.0881917
								0.646424	0.000310229	0.00321705	0.0409855
								0.227763	0.176636	0.000355685	-0.000371137
								0.0295132	0.00328226	0.137321	-0.00895381
								-0.00196784	0.00321898	-0.000446878	0.000356049
								0.000475064	-0.000359852	0.142747	0.0551787
								0.0983587	0.0032964	0.079669	0.0455091
								0.0191075	1.81128e-05	-0.00147539	0.0205687
								-0.0208588	0.000282906	0.00391964	0.000870448
								0.000602774	0.0778375	0.263518	0.000468831
								0.0480812	0.0685395	0.0610207	0.0011772
								0.587273	0.193968	-0.00226096	0.000557536
								0.000326694	0.0374119	0.000176857	0.0155981
								0.107808	0.00493393	0.00408001	0.0781419
								-0.0150307	0.146744	0.269013	0.0659284
								0.00858388	-0.0249432	0.0852974	0.0590628
								0.123444	0.412022	0.0229102	0.113776
								-0.00139585	-0.00163676	0.083234	0.000498939
								0.0140328	0.0333323	0.0446434	0.18203
								0.896305	-0.00708802	0.0420402	0.0244152
								0.151704	0.358471	-0.00241998	0.00495318
								0.011	0.0671971	-6.09536e-05	0.309463
								0.17767	0.161201	0.349504	0.460107
								0.296148	-0.00254967	0.185546	0.142374
								-0.00507916	0.639564	-0.00241678	0.00109006
								0.0184188	0.11631	0.00614617	0.0141099
								0.253447	0.0241462	0.0919225	0.307638
								0.470647	0.0426586	-6.2598e-06	0.53906
								0.000188419	-0.00306238	-0.0602719	0.0427976
								-0.00039428	0.149207	8.46727e-05	-0.00265532
								0.000128768	0.00192936	-0.00572631	0.00105314
								0.0470778	0.147371	0.0562918	0.156447
								-0.0660904	0.0419884	0.000366361	0.0572607
								0.0544265	0.139833	0.0015689	0.0115787
								0.0619835	0.0450755	-0.00471044	0.224562
								0.0166749	0.105716	-0.00115949	0.263328
								0.0960678	0.0338136	0.000611557	0.0718917
								0.690414	0.171416	-0.0560643	-0.0015757
								0.289439	0.00840145	0.0143391	0.0848377
								0.125051	0.132001	0.347109	0.185069
								0.0764584	0.059037	4.42579e-05	-0.00178046
								0.157914	0.287423	0.0400339	0.00565371
								0.306945	0.0934318	9.35036e-05	0.0366659
								0.00199836	0.152151	0.000709369	0.192787
								0.0659688	5.16741e-07	-0.0231812	0.00165607
								0.172915	0.420478	0.0449339	0.00259137
								0.0139903	0.162984	0.00468734	0.0530533
								0.110593	0.0981878	0.457288	0.0411164
								-0.000112997	0.12082	-0.00156227	0.0417224
								-0.000791607	0.00759281	-0.0437888	0.0229256
								0.0687882	-0.00181751	0.0840663	0.235754
								-0.0776344	-0.000541555	-0.00232154	0.081628
								0.00160848	0.00213131	-0.000441681	0.00879552
								0.503321	0.00799254	-0.000228698	0.0718442
								0.0679589	0.321111	-0.0131987	0.148799
								0.215577	0.0901761	0.000434138	0.0524238
								0.00530789	0.176117	-0.00151958	0.0201383
								0.00171947	-0.0352667	0.285777	0.0613133
								0.290419	-0.0221435	0.0029986	0.0050142
								0.264656	-0.000398146	0.0365635	0.0471901
								1.3197e-05	0.000345109	0.0787513	0.0114812
								0.477643	0.0276475	0.00427717	0.0537706
								0.361875	0.0949752	0.0654187	-0.00406476
								0.137719	0.0731962	0.050706	0.712544
								0.00178383	0.0681667	0.00166549	0.000466666
								-0.0031579	0.125124	7.12713e-05	0.155905
								4.39637e-05	0.152464	0.00352847	0.0554439
								0.0858814	-0.00214462	0.70675	0.0767214
								0.133169	0.0465928	5.77323e-05	0.181851
								0.0094146	0.0989414	0.000919832	0.0414103
								0.0771843	0.144359	-0.0065219	-0.00547399
								-0.017934	0.262496	-0.000351853	-0.0351285
								0.206296	0.0241381	-0.000410863	0.118356
								-0.00075196	-0.000438303	-0.00319142	-6.04504e-05
								0.0563933	0.101344	-0.000988086	0.0648281
								0.0171925	0.0220493	-0.00310764	0.26009
								0.0306089	0.0689782	-0.000357316	0.275101
								0.273088	1.40545e-05	-0.00469798	0.0205817
								0.00747396	0.402619	-0.00546529	0.0618854
								-5.10128e-05	0.153457	-0.00097543	0.0303515
								0.00359726	-0.0367176	0.000430951	0.254406
								0.361222	0.248308	0.000499468	0.0872067
								0.0828175	0.0219157	-0.00141769	5.4554e-06
								0.0375191	-0.00233645	0.000154559	-0.00557482
								4.58118e-05	0.0953768	-0.00393866	0.0383944
								0.205628	0.795589	-0.00691853	0.0619906
								0.119714	-0.0042212	-0.00796364	0.0110015
								-0.0365623	0.0109629	-0.00455258	-0.000292501
								0.00572206	-0.0108879	0.0349053	0.196568
								0.0518037	-0.00196369	0.0176077	0.0318418
								0.121344	-0.00619593	0.0531787	-0.00909865
								-0.00388899	-0.00229499	0.0196794	0.00182505
								-0.0297903	0.0054747	0.0756565	0.0111531
								0.676034	-0.0322731	0.127873	0.152288
								0.184842	0.0211041	0.0317236	0.00361485
								0.212447	0.292064	0.436739	0.0716306
								0.0346107	0.197091	0.247001	0.127896
								0.0563208	-0.00280522	-0.000239607	-0.0217927
								0.00310704	0.0251567	0.003163	0.0077825
								0.0500012	-0.0011424	-0.00155358	0.0199822
								0.0249695	-0.0871965	-0.000662477	0.012063
								0.0023923	0.114323	-0.000364643	0.0118255
								0.00219773	0.143986	0.0342627	0.07589
								-0.00137789	0.0313552	0.0314536	0.268359
								0.119585	0.0015468	0.00172349	0.0427104
								0.09371	-0.00025884	-0.0057171	0.00254986
								0.00919452	-0.000126757	0.143802	0.00459585
								-0.0606275	0.0579304	0.554773	-0.00354958
								0.0496821	0.143577	0.00347866	0.0586446
								-0.00140659	-0.000566376	0.00163425	-0.00055705
								0.00535995	-0.0166735	0.481107	0.0191115
								0.049896	0.00214629	0.202731	0.00692482
								0.0026162	0.00167853	-0.000272731	0.0588035
								0.00374258	-0.0153836	0.0105688	0.234308
								0.00323791	0.00224431	0.0113712	0.00363838
								0.000778044	0.00205207	0.0214184	0.0103749
								0.0020881	0.118927	0.0167847	0.408821
								-0.0055347	0.0072938	-0.000204485	-0.00391211
								0.550985	-0.000319009	-0.000889586	0.242455
								-0.000757084	0.0665297	0.259556	0.0139792
								0.262289	0.162617	0.000242409	0.0811332
								0.0165175	0.018322	0.00239487	-0.00819989
								0.36642	0.00388934	0.11351	0.000449954
								0.0335782	0.00537717	0.494018	0.00916095
								0.00206966	0.117163	-0.0204641	0.00462208
								-0.000568076	0.0293815	0.00683478	0.0813293
								0.0879646	0.121638	-0.0126955	0.158889
								0.511977	0.00964874	0.185836	0.00107186
								0.189874	0.0266746	-0.00473527	0.00441919
								0.336448	-0.00903408	0.00886901	3.9982e-05
								-0.00922114	0.115039	0.0711297	0.0317893
								0.719919	0.0233954	0.38291	0.299445
								0.0234547	0.250437	0.11211	-0.00464638
								0.192527	-0.002432	0.602181	0.330478
								-0.000702622	0.0987044	0.646566	-0.0104062
								-0.0167588	0.539916	0.00370165	0.394994
								0.224466	0.0340752	-0.00360367	-0.0504007
								0.189531	0.0902807	0.208811	0.0189799
								0.235744	0.154567	0.000444109	0.036086
								0.000508868	0.0715588	0.0112558	0.0204995
								0.699688	0.00439652	-0.00112501	-0.00264404
								0.0646202	0.00910074	-0.00487813	0.0303393
								0.146891	0.0592723	0.238893	0.130024
								-0.0176133	0.0543371	0.349559	-0.0086059
								0.124981	0.151225	0.215663	0.257251
								0.638857	-0.00839658	0.0370634	-0.00369536
								0.00199837	0.0894647	-0.00032064	-0.00853446
								0.312819	0.00542616	0.232827	0.0286757
								0.185584	0.182753	0.0149621	0.17499
								0.0612461	0.0162412	0.000324507	-0.0050727
								0.0114683	0.00867188	-0.00121276	0.256532
								0.197835	-0.00271267	-0.00789226	-0.00308077
								-0.00404254	0.0577382	-0.00989754	0.0096407
								-0.00610671	0.0908806	0.852514	0.560324
								0.60627	0.208027	-0.00010537	0.000205832
								-0.000288546	0.140372	0.045775	0.0139167
								0.0144972	-1.2981e-06	0.0101763	0.0369222
								-0.000444207	0.205633	0.0644565	0.0497963
								0.300709	0.240841	0.00378096	0.012159
								0.2246	-0.00263634	0.123672	0.0896739
								0.00138374	0.128539	0.0467232	0.00698786
								0.00638781	0.000941641	-0.000136193	0.0147683
								0.000796642	-0.0122882	-0.0273319	-0.00034684
								0.0958872	0.00158129	0.101051	0.753333
								0.122636	0.0182684	0.000696931	0.118854
								0.112934	0.0857442	0.0267542	-0.0155145
								-0.00215375	0.156413	-0.013301	0.251459
								0.11925	-0.0784903	0.222628	-0.00611357
								0.0467038	0.00132075	0.063335	0.00249073
								0.0160756	-0.000384335	0.360041	0.0242763
								-0.000573906	0.0297381	0.233801	0.318791
								0.159602	0.00711163	0.159649	0.052676
								0.143798	0.00152723	0.325954	-0.0207969
								-0.000682587	-0.00139071	-0.0104424	0.00012281
								0.00104145	0.021655	0.00857381	0.0543966
								-0.000813875	0.180043	0.00322837	0.00966658
								0.0533186	0.071138	0.000192441	0.292697
								-0.00390963	0.173493	0.00108512	0.00944358
								-0.000390407	0.24891	0.0141031	0.279808
								0.115635	0.00191699	0.0282191	0.00720056
								-0.00944402	0.432276	0.00501286	1.01893
								-0.00224743	0.314444	-1.45496e-05	0.248866
								0.140868	0.176896	0.133208	-0.0105589
								0.149335	-0.000899301	0.000211436	0.0121186
								0.101033	0.00563853	-0.00645764	0.0517072
								-0.000693844	0.00763847	0.00619444	0.0924707
								0.211337	0.00186407	0.00147341	0.054676
								0.0676813	-0.00105214	0.000608479	0.151311
								0.302678	0.00289541	0.00076642	0.36569
								-0.000761343	-0.000378575	-0.0139007	0.00112035
								-0.00380196	0.545674	0.0448834	0.0873609
								0.310087	-0.0100407	0.0664998	0.409437
								0.147993	0.0750639	-0.000225679	0.5267
								-0.000106995	0.00694077	0.216764	0.120744
								0.0115588	-0.0707729	0.0616175	-0.00905169
								0.0191219	0.00357377	-0.00934321	0.05869
								0.636218	0.223509	0.523142	0.144248
								0.152361	0.474262	-0.00376182	0.171549
								0.186277	-8.10775e-05	0.301323	-0.000731374
								-0.00790878	0.109894	0.0544805	0.0970233
								0.0345134	0.217554	0.00174991	0.0261473
								0.00714057	0.360621	-0.00572787	0.0336823
								0.0175831	0.053626	-0.0012172	0.0901009
								0.191305	-0.00305061	0.000788573	0.06435
								0.220068	0.0252836	-0.0037931	0.0125077
								-0.00154531	0.448003	0.0280818	0.070419
								-7.16063e-05	0.50917	0.00174448	0.0352592
								0.371419	0.323196	0.000245773	0.128527
								0.219839	0.0801808	0.248699	-0.0387644
								0.0298754	0.330275	0.698244	0.0712745
								-0.00342016	0.00052989	-0.00109691	0.00416032
								0.322449	0.125915	0.0122159	-0.0179807
								0.0013476	0.0135898	0.00193485	0.00200818
								0.175369	0.000657034	0.0271692	0.0197464
								-0.000279328	0.438202	-0.00309802	0.00016698
								0.000517425	0.103698	1.01171	0.0130971
								0.00850243	0.0257178	0.00615544	0.156021
								0.602089	0.594786	-0.00878799	0.11138
								0.143303	0.62389	-0.00558925	-0.001794
								0.00860442	0.000251912	-0.000322995	-0.0464753
								0.201685	0.261606	0.0709478	0.0584014
								0.091285	0.12675	0.0549123	-0.00325465
								0.146727	8.73627e-05	0.0289806	0.0953178
								0.293246	0.0230676	-0.0020143	0.142466
								-0.0103633	-0.0331967	0.0028412	0.0313883
								0.488566	0.817666	0.0230965	0.0679308
								0.178528	0.0027902	0.00177015	0.0790573
								0.182543	0.0142276	-0.0023634	0.00404111
								-0.00171339	0.516516	0.00371332	0.0981066
								0.116781	0.0652449	0.0125897	0.00360709
								-0.000146538	0.142158	0.0281425	-0.00718472
								0.844477	0.00642483	-0.00166503	0.31794
								0.069368	0.123003	0.0712544	0.263199
								0.28	0.0146304	-0.00131252	-0.000176702
								0.0427266	0.062179	0.00666097	0.00351926
								0.0374517	0.000827965	-0.00159218	0.293404
								0.512617	0.0878563	0.0236437	0.275631
								-0.000422964	-0.00497744	0.0507751	0.0351907
								0.571278	0.0365804	0.00717553	0.603567
								0.0081714	0.520377	0.00765606	0.225513
								0.00957159	0.100059	0.00474157	0.000295914
								-0.00499842	-0.0241066	-0.0752777	0.028188
								0.133247	-0.00154587	1.95495e-05	0.0988906
								0.0328132	1.12771	0.112081	0.0524851
								-0.0015095	-0.0815849	-0.00491479	0.116228
								0.27593	0.0360468	7.0673e-05	0.00360215
								0.0693174	-0.0091646	0.000841482	0.017047
								0.183915	0.00149303	-0.00049367	0.120937
								0.00131643	0.139079	-0.00666214	0.216805
								0.301897	0.279195	0.00676035	0.0697587
								-0.00835277	0.00618209	0.366934	0.0588871
								0.0041194	0.924317	0.0353292	0.0858963
								-0.0312471	0.0160274	4.35607e-05	0.000902116
								-0.000662701	0.0833643	0.000324463	0.131528
								0.352115	0.000391839	-0.00071335	0.00598264
								-0.00260932	0.146154	-0.0021113	0.803881
								0.0283346	0.284026	0.00455504	0.0471603
								0.394089	0.0243404	0.0023393	0.274891
								0.0021437	0.00299314	0.00192473	0.0176391
								0.000469428	-0.000709791	0.0592564	0.00142273
								0.00298401	0.0719559	0.00117511	-0.0155373
								0.0689304	0.416111	0.00180933	0.182792
								0.341685	0.204631	0.00075102	-0.000828413
								-0.004192	0.0121011	0.000558208	0.0974576
								-0.0449881	0.293874	-0.0103633	0.364622
								0.0105136	0.0982617	0.00272446	0.176908
								0.135961	0.000579535	0.28163	0.0822378
								0.0108969	0.111097	0.0654742	0.182547
								0.242676	0.103468	0.0813255	-0.00215721
								0.0420644	0.313727	0.0171256	0.201551
								-4.90054e-05	-0.0448322	-0.000762311	0.291374
								0.487828	0.0049213	0.0622952	0.0544557
								-0.00151001	-0.0043078	0.0237578	0.0258624
								-0.00154057	0.0112919	0.0162209	0.0749493
								0.136655	-0.000900264	0.00988307	0.37103
								0.00437949	-0.0446542	-0.00126447	-0.00227676
								-0.00157322	0.00770337	5.91118e-07	-0.0532344
								0.0109197	0.0334194	0.00494159	-0.0420754
								0.00124184	-0.0318172	0.00187188	-0.0170147
								-6.77379e-05	0.0409398	0.00987184	0.0068085
								0.0114264	0.344157	-0.00171044	0.180016
								0.000965213	-0.00223332	0.144999	0.00543042
								0.134219	-0.00695348	-0.000172114	0.0169965
								-0.00487339	-0.017141	0.480243	0.0266081
								0.0108053	0.00562017	0.197955	0.141502
								0.640592	0.0028906	0.0171219	0.0604941
								0.0001449	0.0182778	-0.00154302	0.0487292
								0.166979	0.200685	0.0298247	0.0265657
								-0.00200037	0.26154	-0.00533691	0.0511161
								0.348373	-0.0824342	0.132726	0.000956895
								0.171228	0.540435	0.655279	0.387182
								0.0360407	0.0806031	-0.00874755	0.00737427
								-0.00198186	0.284515	-0.00612465	-0.0112808
								-0.00768077	0.394529	0.00921944	0.00614372
								0.56665	-0.0195633	0.264193	0.00252203
								0.0897533	0.459224	-0.00262015	0.122261
								0.0528402	0.00451461	0.749994	0.200657
								0.149999	-0.0261413	0.142503	0.000639741
								0.318547	0.260878	0.022051	0.00812255
								0.0106964	0.279951	0.000811732	0.0449034
								0.0102171	0.0704218	0.00330832	0.140392
								0.0747734	0.1011	0.00259855	0.302412
								0.304204	0.193488	0.0649143	0.00372044
								0.518543	0.000614587	0.164624	0.0585911
								0.148538	0.283211	0.002484	0.449996
								0.0751413	0.278447	0.186418	0.00297081
								0.0640628	0.0517612	0.445156	-0.00124071
								0.223314	0.0358302	0.116047	-0.0106268
								-0.00451776	0.160655	-0.0333834	0.000955585
								0.00256721	0.429891	0.0065933	0.0624971
								0.00134394	0.223034	0.135204	0.6243
								0.0270471	0.0734732	0.425104	0.0301762
								0.298484	0.144163	0.0631797	-0.00193793
								0.000286688	0.117038	0.0478152	0.140194
								0.00297066	0.0908207	0.346889	0.00833949
								0.447625	0.0130679	-0.000264276	0.00341252
								-0.00149375	0.220307	0.00351248	0.0549385
								-0.000467817	-0.00162692	-0.00486866	0.00310095
								0.618828	0.00470112	0.0304116	0.208947
								0.047859	0.507394	-0.0170734	-0.000802613
								0.0596351	0.000584991	0.00138499	0.122434
								0.0292036	0.240691	0.0301337	0.00635453
								0.0233648	6.30456e-05	0.000106053	0.0688056
								0.00104491	0.00752683	-0.00234204	0.0142752
								0.244372	0.00415066	0.217563	0.170431
								-0.00655852	0.0724266	-0.00102229	-0.00562029
								0.00272446	0.393497	0.968662	-0.0466204
								0.0459396	0.0955714	0.0611598	0.226341
								0.158213	0.0197397	0.104174	0.427884
								0.0358505	0.246152	0.022624	0.00103601
								0.00422854	0.0211715	0.0181143	0.00694902
								0.143013	-0.0492494	0.119284	0.000987219
								-0.000328734	0.00897666	0.355162	0.480501
								-0.00374889	-0.0188006	-0.00141212	-0.00201284
								0.0187968	-0.00679515	0.558958	-0.00184712
								-0.0141653	0.0928905	0.0274405	0.0293945
								-0.000753084	0.0311998	0.0755782	0.00226699
								0.417466	-0.00394947	-0.00757904	0.0147321
								-0.0025622	0.277557	0.00526792	0.124437
								0.358589	0.296312	-0.00253282	0.121965
								0.192273	0.567284	0.134881	0.0815628
								0.0058659	0.0625507	0.0115235	-0.0004455
								0.0350135	0.0304506	0.0858161	0.00120897
								0.000363048	0.516928	0.00234244	0.457962
								-0.000640527	0.0644324	0.0018319	0.00582332
								0.00118209	0.166984	0.00771349	0.0123627
								0.00726956	0.0877804	0.0563471	0.143498
								0.221513	0.0867858	0.463944	-0.00551617
								0.0753022	0.145662	0.160288	0.0133996
								0.0121255	-0.068357	0.194231	0.166982
								0.0781447	0.00507058	0.000635827	-0.00651953
								0.00916342	0.0266101	0.123591	0.0168059
								-0.00711619	0.00230307	0.000674842	0.0184811
								0.227572	0.076539	0.0442463	0.103533
								0.183848	0.387031	-0.0291338	0.269944
								0.0254474	0.738234	0.156326	0.0756696
								0.00973174	0.000416995	0.00428412	-0.0331241
								0.285883	0.260077	-0.003712	0.0126133
								0.0123576	-0.000478484	0.53879	0.101581
								0.0913984	0.249537	1.0636	0.00558462
								0.0058525	0.00618592	-0.000821939	0.0430604
								0.111841	0.011485	0.00133306	0.00127843
								0.28163	0.0547437	-0.0011717	0.00329004
								-0.00447642	-0.0301113	-0.00495558	0.0997552
								0.373181	0.00514362	0.0147159	0.25843
								-0.000310146	-2.7206e-05	0.296996	-0.0669407
								-0.00307177	0.545446	0.00651055	0.0032027
								0.00161896	-0.0104423	-0.00373923	0.00939389
								0.0706477	-0.00163961	0.000970875	0.0844987
								0.294401	0.115022	-0.00164077	0.00921474
								0.0963124	-0.0170431	0.00175809	0.0152077
								0.164217	0.00136409	0.14326	0.0233099
								0.108305	0.236801	0.110285	0.148798
								0.102745	-0.00142219	-0.000370458	0.109624
								-0.0006056	-0.0015695	0.00826301	0.103533
								0.123435	0.141983	-0.000724566	0.0768204
								0.0201301	0.0798663	-0.0072325	0.0599172
								0.000296938	0.381849	-0.00292016	-0.0113183
								0.16652	-0.00269002	-0.000730174	0.00585882
								0.0124219	-0.00420514	0.00272838	-0.00719052
								0.0413763	0.0127686	0.0406933	0.0535129
								0.0020105	0.15783	0.00046917	0.409545
								0.203909	-0.0027494	0.0131592	0.200537
								0.123973	-0.0117732	0.000913705	0.500635
								0.253596	0.0936575	0.000716053	0.136886
								0.0131264	0.28303	-0.019549	0.0881964
								0.237248	0.00635537	-0.00565331	0.0121121
								0.0915968	0.185517	0.00436708	-0.0199637
								0.0115185	0.240156	0.395965	0.314044
								0.139273	0.00285802	0.0115841	0.00410342
								0.127839	0.164126	0.0139299	0.0171789
								0.00189646	0.00852718	-0.0055685	0.103615
								6.06033e-05	-0.0820449	-0.00221151	0.0246177
								-0.00327024	0.00128947	-0.0166086	0.0407975
								0.146148	-0.0224451	0.0493287	0.241782
								0.00095723	-0.00664813	0.0240372	-0.00395877
								0.116885	0.000734749	0.0111343	0.158061
								0.00355117	0.0719998	-0.000404117	0.120388
								0.183323	0.00113738	0.00515695	0.243937
								0.151329	0.0397246	0.148968	0.0339998
								0.000166007	0.37795	-0.00694548	0.00188814
								0.666744	-0.000263719	0.0455868	0.337964
								0.000894847	0.0301516	-0.0283168	0.525721
								0.0779717	0.14174	-0.00959061	0.0614436
								-0.000874662	0.00325514	-0.000257977	0.0268645
								0.12252	0.323992	0.0031909	0.303703
								0.213789	0.00224943	0.154183	0.373011
								0.290381	0.0623479	-0.00723696	0.00405472
								0.0162682	0.0391714	0.434474	0.607352
								-0.00524903	0.145181	0.000249567	0.12637
								0.111871	-0.00108232	0.385509	0.00609749
								0.160968	0.064779	0.00426744	0.152101
								0.217787	1.40409	0.0310502	0.00332419
								0.177169	0.00781779	0.00673058	0.227639
								0.469499	-0.0173527	0.117146	0.0605987
								0.0226934	-0.00152911	0.0329636	0.241487
								0.10674	0.309866	0.00250674	0.786304
								0.0302811	0.0164697	-0.00113623	-0.0181601
								0.00918836	0.218076	0.0118032	-0.000175407
								0.419734	-0.0307873	0.152222	0.0545253
								0.0412494	0.178416	0.0222356	-0.00258107
								0.00468941	0.0784394	0.112501	0.420689
								0.0235195	0.00549362	0.345898	0.000450283
								0.00230731	-0.0190038	-0.0136026	0.189048
								0.00070434	0.0696739	0.0833466	-0.0010828
								0.369794	0.0177412	-0.000112745	0.225166
								0.00410184	0.0975589	0.051063	0.000200099
								0.161266	0.00355332	0.0275478	0.0810014
								0.00281946	0.00554508	0.157194	0.358247
								0.000549752	0.258726	0.0549005	0.0367234
								0.0654742	0.151609	0.00538218	0.0107335
								0.114741	0.10179	-0.000184197	0.0957606
								0.255197	0.239614	-0.00128913	0.00016413
								0.252941	-0.00146844	0.000272974	-0.000518194
								-0.00187497	0.10639	-0.0426687	-0.0170388
								-0.00161438	-0.0435559	0.105599	0.0438799
								0.00148133	0.0254788	9.65996e-05	0.0570232
								0.00180652	0.141389	0.0421102	0.106007
								-0.00727155	0.224808	0.0763727	0.235922
								0.116268	0.00674436	-0.0621483	-0.00111467
								-0.0349883	0.127347	0.151525	0.0340074
								0.00821453	0.100811	0.00513551	0.00093228
								0.555566	0.00787076	0.200454	0.320602
								0.0365293	0.00272107	0.00132168	0.0246251
								0.0813255	0.141227	-0.00639234	0.264915
								0.00113685	0.408729	0.212756	-0.00549203
								0.0711696	0.554347	-0.000779088	0.174612
								0.0171256	0.0415159	0.0497511	0.0130186
								0.00316332	0.322932	0.117995	0.127863
								0.0554573	-0.00422712	0.257364	0.0599133
								0.0362024	0.00473609	0.078244	0.042943
								0.2606	0.00125603	0.0265282	0.107083
								-0.00666261	0.31789	0.06038	0.000504807
								0.0679028	0.0820167	0.223526	0.0178611
								0.00384691	0.368659	0.0663903	-0.0586204
								-0.0354809	0.00182057	-0.00257101	0.600877
								-0.00151297	-0.0148165	0.00405144	0.000385985
								-0.0340051	-0.0100086	0.140352	0.0547086
								0.00054325	0.385591	0.0510913	0.00154926
								0.0219118	1.17237	-0.00707181	0.352458
								-0.0086251	-0.0949687	-0.0127837	0.186006
								0.00466678	0.00587422	0.409494	-0.00159619
								-0.00139666	0.00266512	-0.00621799	0.471741
								0.297286	0.473329	-0.0155922	0.208474
								0.557625	0.0859496	0.11643	0.0398091
								0.03103	-0.0025438	0.0259087	-0.028114
								0.00294161	-0.0254327	0.000173197	0.104177
								0.094717	0.177864	8.23269e-06	0.110953
								-0.00762957	-0.00109384	-0.0316646	-0.0350157
								-0.00681135	-0.00321436	0.00160385	0.357486
								0.223755	0.00993818	0.000128884	0.479215
								0.0159412	0.306814	0.208103	0.0827391
								0.0831315	-0.000400871	0.278257	0.0887192
								0.512902	-0.00486088	0.0140248	0.0744831
								-0.00136533	0.188282	0.00701555	0.0539635
								0.113008	0.0169161	0.0218564	0.259181
								-0.0293959	0.2483	0.11911	-0.00392533
								0.282254	0.0977272	0.0773597	0.16161
								0.183216	-0.00469228	0.111732	0.320586
								0.0417813	-0.0205789	-0.00452052	-0.0025753
								0.00283332	-0.00110933	0.356025	0.172431
								-0.00281073	0.293047	-0.00357383	0.101861
								0.00785471	0.0524516	0.000536661	0.0461374
								-0.00408754	-0.0175586	0.491487	0.000887529
								0.397538	-0.0144438	0.000401938	0.051892
								0.00093455	-0.018249	-0.000597048	0.172824
								0.384278	0.116295	-0.00213646	0.503702
								0.713454	-0.00128766	0.00198803	0.20627
								0.600474	0.121221	1.03438	-0.002231
								0.211118	0.0118388	0.00105497	0.346725
								0.157287	0.00188134	0.308234	0.00630529
								0.325984	0.0514336	-0.00501295	0.108948
								0.0366774	0.0128786	-0.001012	0.0353073
								0.224642	0.0771326	-0.00190528	0.0801896
								0.00221913	-0.0116402	0.000716166	0.177519
								0.00333231	-0.0546624	0.0543745	0.14459
								0.00334222	0.00786251	0.0741177	0.00102971
								0.00253941	-0.031656	0.3835	0.013208
								0.443541	0.0291393	0.275495	-0.000930443
								-0.000236863	0.213109	0.525089	-0.000835249
								0.811551	0.849423	0.0853762	0.128053
								0.00348096	0.0637988	0.0406421	0.0544843
								0.0152728	0.162198	0.00101329	0.312466
								0.0461354	0.182981	0.0552653	0.131261
								0.0619794	-0.0706784	0.00324554	0.020449
								-7.8127e-05	-0.0018146	0.000249466	0.00686626
								-0.00164733	0.198439	0.394324	0.0673201
								-0.0251451	0.756816	0.114914	0.00177646
								0.0717845	0.180386	0.00465326	0.0426999
								0.00783943	-0.0158268	0.12647	0.670946
								0.456274	0.208096	-0.0346566	0.2355
								0.371452	0.537128	0.000622646	0.00392537
								-0.00493446	0.204157	0.00623892	0.117831
								0.0489843	-0.00140007	0.000367513	0.0306983
								0.162817	0.0945491	0.0147991	0.00142032
								0.433973	0.0623949	-0.00333271	0.0102971
								-0.00726922	0.027963	-0.000389056	-0.00140932
								-0.000642049	0.0620909	0.299023	0.0633977
								0.0622543	0.107817	0.0305113	0.105125
								0.120107	-0.00463749	-0.00174	0.21303
								0.16263	0.0476856	-0.00643344	0.149759
								-0.00187532	0.385191	0.00190577	-0.00629422
								9.51454e-05	0.0292045	-0.00552365	0.00109032
								-0.000379543	0.0985542	0.101131	0.311151
								0.00435685	0.00438485	0.172124	0.00699157
								0.336819	-0.00121738	0.00431209	0.247637
								-0.003499	-0.00146953	-0.00190145	-0.0364151
								0.718795	0.297672	0.355709	0.000464471
								0.298639	-0.000664202	0.102764	0.227562
								0.0857178	0.103633	0.122723	0.0974778
								0.373729	0.0052836	0.0905374	0.022257
								0.0944243	-0.0156668	0.00900378	0.346683
								0.00270165	0.197682	0.566036	0.00925125
								0.252046	0.000814545	0.000638103	-0.00940896
								0.241315	0.213572	0.00495135	0.32133
								-0.00405376	0.00675447	-0.0311324	-0.00321597
								-0.000762311	2.59945e-05	0.0708929	0.447031
								0.0141592	0.00412581	-0.012131	0.0350211
								0.0638872	0.288396	0.082729	0.00220804
								0.0209753	0.0760782	-0.00192764	0.0512672
								0.417036	0.199818	0.634227	0.00178901
								0.00560552	6.97898e-05	-0.00807839	0.00848817
								5.72981e-05	4.66711e-05	-0.00137413	0.180864
								-0.00145665	0.442506	0.0936045	-0.0730579
								0.0771964	-0.000727881	0.375159	0.033825
								-0.0176167	0.00700253	-1.54113e-05	0.0437575
								0.285958	0.153067	-0.00923818	0.168993
								-0.0207056	0.469458	0.0463006	-0.00137817
								0.11745	0.141315	-0.112691	0.00236017
								0.415718	0.188916	0.0875159	0.00889547
								0.0321826	-0.000337718	0.133911	0.0183639
								0.3518	0.0321373	0.221865	0.00564
								0.192916	0.0977068	0.00032029	0.0791194
								0.68301	0.0412663	0.41887	0.345395
								0.132082	0.00225621	0.0107168	0.0004442
								0.148738	-0.000492328	0.00985787	-0.011145
								0.000710546	0.0673357	0.146764	-0.00651931
								8.38088e-05	0.000645558	0.137273	0.121624
								0.264068	0.163031	0.176817	0.00959353
								0.00533654	0.213324	0.00560366	0.178866
								0.00462852	0.34364	0.174951	0.0517289
								-0.00496983	0.208717	0.00781101	0.185342
								0.0633968	0.231166	0.0770419	0.00655673
								0.0165373	0.023944	0.631313	0.197039
								-0.000835649	0.250996	-0.0020446	-0.00485221
								0.042775	0.0856736	-3.5531e-05	0.306362
								0.0147311	-0.000506947	0.089046	0.00270071
								0.124191	0.224353	-0.000992284	0.0192457
								0.0315337	0.00129122	0.00142248	0.117816
								0.00282139	0.0332253	-0.00206583	0.244046
								-0.0187783	0.0222696	5.24643e-06	0.158321
								0.289424	-0.0246519	0.00150099	-0.00114957
								0.554159	0.340966	0.126386	0.33337
								0.000165152	0.125297	-0.00775025	0.0222981
								1.35201	-0.00510052	0.000407141	0.00218798
								0.440436	0.458736	0.124979	0.127321
								0.110818	0.919805	0.0415549	0.000329977
								0.000600259	0.0428937	0.00275335	0.417923
								-0.000376415	0.0722443	5.97691e-05	0.216768
								-0.0050142	0.106859	0.0057793	0.556835
								0.0820282	-0.00797807	0.00305808	4.03678e-05
								0.00195351	0.636047	-0.00437904	0.00125309
								0.00510618	0.00205008	-0.000571808	0.675309
								0.176222	0.0596241	-0.00661936	0.0462352
								0.0549644	-0.0102604	-0.0023178	0.33377
								-0.00022491	0.00237909	0.00051457	0.0388391
								0.213759	-0.00481666	0.384696	0.084673
								0.143186	0.197026	0.0824835	0.000533114
								0.330354	-0.00158119	0.230042	0.0492614
								-0.00346002	0.0597113	0.0585303	0.262985
								0.488345	0.00955257	0.732982	0.260612
								0.748247	0.128848	-5.04127e-05	-0.00664963
								0.000373508	0.267519	0.00894163	0.115119
								-0.00417058	0.450594	-0.00498437	0.165927
								-0.0153783	-0.000698962	0.00169687	0.156756
								0.235812	-0.0135386	-0.00016935	0.123702
								0.30322	-0.00933281	0.00422568	0.130143
								0.0468065	0.0727671	0.0511567	0.0910029
								-0.073168	-0.00680408	0.000464509	0.0183203
								0.00460869	0.0864104	0.248094	-0.0421735
								0.044845	0.0509219	0.00955096	0.386367
								0.181317	0.0572504	0.00357103	0.000575475
								0.122928	-0.0208865	0.00201231	0.0347413
								0.204758	0.00751763	-0.000432928	0.151677
								0.176393	0.0675425	0.00351681	0.210423
								0.0631999	0.144488	-0.00087051	0.0754311
								0.452267	0.13335	0.511574	0.0012577
								0.0683156	-0.00233741	-0.000652805	0.0433297
								0.232058	0.000585256	0.153674	0.0508797
								-0.000684806	0.103045	0.000675102	0.077219
								0.0054959	0.143643	-0.000595343	0.0495925
								0.00266707	0.00264845	-0.00997007	0.0583319
								-0.00584685	0.00874487	0.247651	0.00186641
								0.00395424	-0.012026	0.00173738	0.328043
								0.0371988	0.350896	0.00100392	0.254569
								0.246293	-0.00202136	0.823294	-0.00374362
								0.190433	0.122886	-0.0315815	-0.000134591
								0.248996	-0.00373578	0.606025	-0.00287755
								-0.00222265	0.387341	-0.0329412	-0.00286081
								-0.0328673	0.0873394	0.00105576	-0.0355205
								0.13189	0.327014	0.00123341	-0.00215656
								0.149853	3.26938e-05	-3.37842e-05	0.0274145
								0.458599	6.89247e-05	0.0929072	0.106753
								-0.00167435	0.0225249	0.00339108	0.000599732
								0.101946	-0.00131781	0.0219898	0.123364
								0.0158429	0.0250247	-0.000616093	0.23434
								0.0177958	-0.00121305	0.0254476	0.115209
								0.30808	0.0558371	0.31713	-0.00724167
								0.0131038	-0.00751788	0.133815	0.138394
								0.00480705	-0.000120134	-0.0190572	-0.0626435
								0.00197724	0.00424996	0.00826373	0.00199851
								0.0063833	0.074633	-0.000504742	0.0265865
								0.723053	0.201849	0.177395	0.0399974
								0.00161084	0.0239735	0.195928	-0.0168452
								0.823475	-0.0207234	0.334384	-0.0198711
								0.0559646	-0.000567073	0.00133302	0.00344911
								0.00405606	-0.00895124	0.165152	0.069091
								0.00175663	0.105931	-0.0377866	0.00956031
								0.0577038	0.0809221	0.133696	0.12926
								-0.00514469	0.0756059	-0.00202694	0.0103442
								0.100153	0.396637	0.110498	0.164107
								0.311783	0.0117653	0.0679546	0.213353
								0.00270609	0.184394	0.537984	-0.0180115
								0.575388	-0.00138733	0.00241481	-0.00103135
								-0.0175542	0.0898719	0.589477	0.0111609
								0.0201202	0.00150711	0.354512	0.00227523
								0.184131	1.04242	0.000286066	0.0483834
								0.218031	0.0296712	-0.000704376	0.0676792
								0.160441	0.0657428	0.116085	0.0646385
								0.0170814	0.0193708	0.00206713	0.153829
								0.00411383	0.424821	-0.00046614	0.0145182
								-0.00456286	0.0147127	0.00128446	0.00200907
								0.00176521	0.0327424	0.172627	0.000700373
								0.130953	-0.0305257	0.184874	0.154012
								0.555781	0.00646068	0.00139443	0.0560424
								0.13601	0.00225084	0.246243	0.0297241
								0.204234	0.524346	-0.000116939	-0.00167412
								0.000862283	0.0134267	0.0998411	0.0795398
								0.355026	-0.00537287	0.15778	0.0781071
								0.450672	-0.00712933	0.00786525	0.0579749
								-0.000386064	0.00292058	0.145171	0.130251
								0.0496769	0.0270522	0.0380754	-0.0184214
								0.00100808	0.396904	0.105576	0.0316442
								0.0549392	0.164848	-0.00250697	0.167955
								2.03024e-05	0.228305	0.068699	-0.0185653
								0.0546574	-0.00199036	0.118165	-0.00231819
								0.255596	0.00106837	9.33167e-05	0.00319831
								0.18566	-0.00326626	0.159249	-0.021909
								0.0325127	0.0977037	0.386011	-0.00166999
								0.00259866	0.0624492	0.0255404	0.192762
								-0.00508968	0.00271474	0.0124173	-0.00134641
								0.0207318	0.12091	0.105328	-0.00277155
								0.0799779	0.00673098	0.188495	-0.000593257
								0.124417	0.0187834	-0.00107769	0.00173017
								0.947146	0.206345	0.0299711	0.259083
								0.0792423	0.163893	0.596362	0.0292465
								-0.000493345	0.0135405	0.81729	0.0180236
								0.00389392	0.0321903	0.00176756	-0.0298441
								0.0555619	0.183655	-0.0048063	0.0143977
								0.00175066	-0.00384236	-0.000201816	0.00501475
								0.0188709	0.0155618	-0.000575148	0.0283631
								0.517538	0.179118	0.764933	0.087543
								0.666609	-0.00010946	0.179146	0.208795
								0.00344889	-0.00144826	-0.0173047	0.258618
								0.693624	-0.00561901	0.0309213	0.140961
								0.104373	0.580724	-0.000484553	-0.0220201
								-0.0920839	0.0277814	0.446893	-7.96719e-05
								0.154901	0.00188566	0.136701	0.0314977
								0.0128638	-0.0570478	-0.0168522	0.0162711
								0.00217447	0.207342	0.00979845	0.103582
								0.00250406	1.0261	0.0991965	0.186443
								-0.00644675	0.910933	0.0483526	0.171908
								0.000401484	-0.00406486	0.000422914	0.0289074
								-0.00730322	-0.00457774	0.768066	-0.00429631
								0.38973	0.0916227	0.00697331	0.0992052
								0.761922	0.022034	0.647988	-0.00156527
								0.0691562	0.0223882	0.288232	0.140316
								-0.0106808	0.0932379	0.0302872	0.00193519
								-0.00198483	0.0521597	0.000355021	0.117079
								0.00127093	0.0529524	0.000521827	0.0280109
								-8.18332e-05	-0.0104751	0.158161	0.114356
								-0.000401322	0.095757	0.181558	0.415588
								0.0715433	0.0159353	0.0130379	0.179644
								0.0269588	-0.00887955	0.000179649	0.31946
								0.11857	0.368599	-0.000405158	-0.0206923
								-0.0315432	0.0996522	-0.00127775	-0.00676192
								0.108108	0.0189112	0.00889391	0.0171275
								-0.0351325	1.29976	-0.00156448	0.0179324
								0.00112314	0.0487812	0.280105	0.0729444
								0.0182579	-0.000174105	0.156883	0.108877
								-0.000257735	-4.42148e-05	0.00643499	0.00810128
								0.162503	0.000593527	0.560326	0.0553386
								0.0948828	-0.00463758	0.0506108	0.191544
								-0.0023218	-0.000727834	0.00885959	0.015382
								0.0202476	0.14913	0.422766	0.189774
								-0.00342649	0.0613466	0.0361585	-0.00915734
								0.00236556	0.0933827	0.673313	0.0234217
								0.00107615	0.0445362	0.00238307	0.0949065
								0.339082	0.000795476	0.258085	0.0712765
								0.484623	0.0696635	0.250467	0.111578
								0.339994	0.0123046	0.00400731	0.28236
								-0.0325409	0.204625	-0.00533668	0.353461
								0.0622952	-0.0277467	5.47997e-06	0.0696303
								0.00171015	0.438703	0.00118961	0.00190466
								0.230083	0.00211352	0.192696	0.0560474
								0.189085	0.0122789	0.00401148	-0.0114124
								-4.12556e-05	0.231884	0.00312514	0.183493
								0.0669821	0.000626532	0.0351331	0.0426046
								0.0961584	0.140708	0.172608	-0.0140821
								0.419786	0.606217	-0.000992078	-0.06926
								0.00160492	0.00376935	0.00224063	0.20389
								-0.0130307	0.00125892	0.449696	8.59861e-05
								0.118235	-0.000417243	0.424045	0.246703
								-0.0392295	0.00883267	0.00254311	0.149182
								0.0331511	0.00115384	0.00172168	0.13543
								-0.0116688	0.147342	-0.00442273	0.079051
								0.00807723	0.0331588	0.467819	-0.0297286
								0.0103749	0.269695	0.0510386	-0.017407
								0.0369483	0.0891389	0.234178	0.219627
								-0.000531325	0.00268986	0.309469	0.122511
								0.00034019	-0.00618749	0.0974637	0.103335
								0.00124779	-0.00521773	0.231738	0.0292259
								0.0898037	-0.00396438	0.000979801	0.00738833
								0.279843	0.00206002	0.0569173	0.01315
								0.00364908	0.00239027	-0.000189652	0.242361
								0.0332113	0.0452529	0.0895716	0.187569
								1.37786	0.00496368	-0.00166646	-0.00240884
								-0.00274563	0.00112413	0.125678	0.122429
								0.121995	0.180093	0.315147	0.0109543
								0.0238628	0.549687	0.410601	-0.000426741
								0.0017186	0.00755616	9.54873e-05	0.13554
								0.0751278	0.172993	0.00228734	0.080449
								0.04175	1.15743	0.18982	0.0878133
								0.000400736	0.147397	0.420656	0.432801
								0.454092	0.0105117	-0.0222581	0.178335
								0.0517746	0.0143735	0.0931296	0.0293658
								-0.00020747	0.611525	0.0512243	0.00121117
								-0.0163704	0.00226957	0.068645	0.469131
								0.0104219	0.113098	0.338619	-0.0023212
								-0.0196899	0.00896011	0.232734	0.0041677
								0.0112141	0.0483564	-0.000124708	0.0183377
								-0.00525463	0.0457164	0.0803445	0.162177
								0.139725	0.00296402	0.00613492	0.00190061
								-0.0223597	0.0260878	0.00360816	0.114147
								-0.0029155	0.0496528	-0.000329788	0.00177351
								0.00205504	0.1474	0.125203	-0.00970815
								-0.0186113	0.180321	-0.037782	0.488123
								0.0371192	0.0159685	0.0618341	0.180436
								-0.0110609	0.0692683	-0.00022412	0.178466
								0.000542226	0.177814	0.00808099	0.455348
								0.0985478	0.00153097	0.0137297	0.107289
								0.353303	-0.0325155	0.0543282	-0.0092011
								0.00845271	-0.00295333	0.309832	0.277859
								0.00261791	0.0101413	0.000651414	0.105123
								0.00463934	0.027389	-0.0310337	0.336133
								0.0229387	-0.060175	0.00124259	-0.0180976
								0.0446925	0.305639	0.0263199	0.0262186
								0.476487	0.0376877	-0.00450121	0.000224014
								-0.00379986	0.281046	0.233643	0.0678869
								-0.000528284	0.378578	0.00059532	0.153237
								0.0176736	-0.00307278	-0.00261978	0.00835951
								-0.000916294	0.222175	0.0964246	-8.18984e-05
								-0.00136779	-0.0393816	0.0411221	0.270597
								0.0100469	0.211712	0.00397302	0.185637
								-0.000138155	0.0078114	0.000625611	0.058131
								0.313319	0.147931	0.0297142	0.0254558
								0.128472	0.463344	0.000219632	0.00574711
								0.00319743	0.481365	0.0330632	0.0918404
								0.00693063	0.00115591	0.107208	0.0453809
								0.0654778	0.346365	0.000333244	-0.00178228
								0.0871574	-0.0053372	-2.35573e-05	0.766732
								0.0364433	0.0740316	0.036326	0.241109
								-0.000946911	0.0933846	0.0354349	0.0769589
								0.0963687	-0.000962582	0.239016	0.000417255
								0.418395	0.00137605	0.000282962	0.213374
								-0.0123526	8.30334e-05	0.00126751	0.0859548
								-0.00379444	0.0579457	0.0870508	-0.0401086
								0.517212	0.0365206	0.107451	0.00377072
								0.118035	0.0172214	0.000387142	0.032613
								0.0258957	-0.0229103	0.0308745	0.00126422
								-0.00340569	-0.00677179	0.113662	-0.00263441
								0.00108238	0.000139614	0.000104172	0.00156874
								0.0192433	-0.00291573	0.567462	0.0276377
								0.00107461	0.123921	-0.0155504	0.0677343
								0.0286332	-0.000126594	-0.000162835	0.00301495
								0.0149943	0.0268884	0.144879	0.118448
								0.0157681	0.00107856	5.43544e-05	0.120377
								0.00348331	0.0391756	0.760883	-0.00217428
								0.000431587	0.338886	0.0103661	0.115702
								0.0969225	0.423697	-0.00141006	0.0993863
								0.168144	-0.00564315	0.738192	0.272369
								0.0732865	0.683237	0.000543713	0.0521919
								-0.00595366	0.548984	0.410456	0.228531
								-0.00316726	0.208105	0.0218205	0.00418476
								0.144498	0.10021	0.00180527	0.100443
								0.182001	0.00393722	0.219084	0.0360573
								0.116698	-0.000311052	0.000109401	0.103919
								0.0774114	0.000683271	0.228217	0.0367202
								2.18409e-05	0.00244244	0.0051138	0.14141
								0.00116073	-0.0428233	0.0484626	0.00846612
								-0.0260759	0.0631236	0.000413057	0.110468
								0.830846	0.0685582	0.0062722	0.150685
								0.207883	0.213811	0.0714933	0.0112761
								0.0219547	0.127103	0.404086	-0.00120536
								0.0165856	0.106584	0.367563	0.0248829
								0.0196707	-0.00110408	0.630005	0.280862
								0.239738	0.34436	0.0319243	0.00790853
								0.113118	0.0520463	0.00959719	0.220428
								0.00407594	0.566844	0.0372947	0.0686453
								0.238594	0.33655	0.0767001	0.107303
								0.100974	0.0270598	0.00053834	0.180285
								0.140828	0.266833	0.169558	-0.019603
								0.00104137	-0.0579788	0.000900835	0.0916257
								-0.0054377	-0.00892853	0.000113572	0.0474696
								0.065384	0.0636187	0.000912056	-0.0180795
								0.145419	0.00454268	0.262249	-0.0378879
								-0.00219352	-0.00258335	-0.0133708	0.0417947
								0.100648	0.0287101	0.113154	0.0213577
								0.033911	0.0257644	0.129081	0.0130011
								0.534612	-0.0033997	0.000712719	0.101003
								0.0342684	0.00454776	0.426458	0.0283974
								0.147198	0.205213	0.35064	0.0361918
								0.0154555	-0.00981861	0.0609243	0.0148977
								-0.0040504	-0.0030909	-0.000643206	0.095671
								0.0703405	-0.00356255	0.0898735	0.0441664
								0.327774	0.006666	0.000584578	0.0595726
								0.0574418	-0.00133766	0.0932911	0.000699771
								0.523655	0.122972	0.225458	0.0701351
								0.00590861	0.00641585	0.0740158	0.000145982
								0.000430286	0.228942	-0.00249805	0.0701354
								0.0700288	0.0854343	-0.00510818	0.126523
								0.00227681	0.209389	-0.00102053	0.00608549
								0.204811	0.000689485	0.00389059	-0.00104811
								-0.00172222	-0.00415856	0.218856	-0.0171528
								0.052767	0.00202204	-0.0527034	0.0516319
								0.00683236	0.000824691	0.081913	0.0417694
								0.248575	0.389681	0.000886184	0.0195017
								0.0642464	0.470032	0.415809	0.00563936
								0.00878769	0.128827	-0.0153844	-0.00581609
								-0.00272969	0.135635	0.00138058	-0.00940773
								0.182164	0.187588	0.00135955	0.000846241
								0.140243	0.00152607	0.0721472	0.00448178
								0.00172324	0.032945	0.0423489	-8.72475e-05
								0.323221	0.264308	-0.00115572	0.00741103
								-0.00242257	0.00012546	-0.0494531	0.0401541
								0.00909217	-0.00699384	0.116807	0.223727
								0.000476097	0.0139625	0.00030475	0.00680375
								0.241136	0.00805694	0.0115489	0.00668688
								0.130657	0.0180722	-0.000854077	0.00074067
								-0.0121715	0.00935737	0.0439011	0.354756
								0.00796028	0.333606	0.534227	-0.00518248
								0.0395981	0.030925	-0.00217726	0.045778
								-0.0743442	-0.0145489	-0.00402428	0.0938011
								0.0622177	0.00733718	0.00107714	0.00863145
								0.0895758	0.27246	0.0810718	0.000216578
								0.632425	-0.00463252	0.209666	0.0838465
								0.019488	0.0035164	-0.0360648	0.0122706
								-0.00246897	0.24283	0.216812	0.00179479
								0.224036	-0.00368614	0.0129597	0.0446887
								-0.0291624	0.00210949	0.0173643	0.021285
								0.309669	0.0455042	0.0010945	-0.00242532
								0.00160375	0.00118232	0.000353633	0.00140583
								0.048742	-0.000806791	0.313509	0.265137
								0.638134	0.0120425	-0.0027165	0.0022391
								0.0394972	0.189149	0.350132	0.213382
								0.13181	-0.00613193	0.0460668	0.0617412
								0.0216684	0.0381798	0.000744749	-0.00300893
								0.0642167	0.0522408	0.00124718	0.180116
								0.843736	0.00198412	0.0151573	0.0212488
								0.000386402	0.0684046	0.258071	0.00167116
								0.260479	0.0125886	0.0902862	0.0352761
								0.0887327	-0.000839209	-0.00133955	-0.00279874
								0.00637649	0.195944	0.00135993	3.87133e-06
								0.00569446	-0.00240567	0.0639772	0.020981
								0.302697	0.000642097	-0.000991432	-0.0201143
								0.00226009	0.283177	0.473395	0.0293449
								0.153915	-0.000109578	0.00183269	0.11475
								0.201237	0.0635461	0.0387116	-0.0290097
								-0.00157488	0.00506145	0.0414408	0.000415274
								-0.000199537	-0.00143156	0.00298972	-0.0175629
								0.00359722	-0.00363547	0.0269764	0.360844
								0.002172	0.0177722	0.0372999	0.137382
								0.375938	0.118142	0.0930884	0.388909
								0.00173166	-0.000891713	0.0312823	-0.00326576
								0.491744	0.052438	0.0483497	-0.0302169
								0.0105623	0.012473	0.218532	0.0120675
								0.0692159	-0.0015661	0.0108144	0.0103686
								-0.000239339	-0.00371965	0.225544	0.0142243
								0.0944753	0.0112312	0.232304	-0.0015794
								0.250471	0.0859209	-0.00218162	0.0292185
								0.183908	-0.0304923	0.694756	0.00979546
								0.479675	0.00984632	0.409063	-0.0366445
								0.0291098	0.130315	-0.00707654	-0.00580134
								0.000977782	0.0192906	0.165367	0.0454281
								0.126986	0.27688	-0.0212827	0.0236846
								-0.030583	0.36107	0.334477	-0.00345918
								0.109541	0.151986	-4.83206e-05	-0.00582347
								0.364636	0.142509	0.256318	0.00221186
								0.0301204	-0.028414	0.0023462	0.126682
								-0.00973252	0.199742	0.020961	-0.0068788
								0.175418	0.0756944	0.119202	0.00574373
								0.0382217	0.00899046	0.0144689	0.291784
								0.000334265	0.555876	0.000788397	0.00365053
								0.403852	-0.000358262	0.128521	-0.00643364
								0.002079	-0.0121483	-0.0108879	0.00258226
								0.526791	0.110885	-0.000748002	0.0122348
								0.158385	0.0795994	0.00331344	0.00482969
								0.204218	0.0259062	0.251986	0.00252697
								0.0786347	0.000848061	0.164148	0.00934335
								0.0226255	0.0135314	0.382452	0.291544
								0.234493	0.00925843	0.320869	-0.00017319
								0.343653	0.188855	0.00584031	-0.000545009
								0.00728921	0.0176918	0.0322238	0.000380758
								-0.00219854	-0.000933382	0.0397208	0.0125169
								0.027822	0.379283	0.00254323	0.036065
								0.0260328	0.00282638	0.47139	-0.0435623
								0.0391501	0.215406	0.0014432	0.000511197
								0.0474218	0.000187984	0.0612606	0.00147928
								0.114686	0.121365	0.390791	0.215228
								0.147197	-0.0283586	0.0293094	0.00613061
								0.0943764	0.336641	0.0992328	0.0943606
								0.241769	0.064204	0.596839	-0.0287328
								-0.00230267	0.00556753	0.0424557	0.00345012
								0.00389697	0.0688127	0.382831	0.00421976
								0.0437697	0.0261733	0.359839	0.00356952
								-0.00511099	0.427458	-0.000500256	0.033837
								0.00155149	0.27888	-0.00308064	-0.00724547
								0.00939447	0.233254	-0.000461717	0.00217904
								0.13358	-0.000596352	-0.00362381	0.00881682
								0.0532672	0.0386791	-0.000237819	0.0115172
								0.225234	0.547173	0.420029	0.0406129
								0.0806737	0.0202481	-0.00314635	0.118978
								0.180817	0.307157	0.0112773	0.0383753
								0.023462	0.0539451	0.290185	0.00549908
								-0.00119954	0.0530605	0.114021	-0.00121899
								0.000762092	0.031609	-0.00132709	0.0957972
								-0.0236764	0.0929148	0.0021804	0.000579597
								0.542291	0.0456973	-0.00535225	-7.2318e-05
								0.000160329	0.136408	0.000901873	-0.000683765
								0.648224	-0.00416335	0.206798	0.00668346
								-0.00146495	0.314376	0.484733	0.0571242
								0.000231321	0.0525511	4.11721e-05	0.00237068
								0.0226581	0.0310799	0.000993751	0.00300328
								0.249856	0.0830223	-0.0118554	0.0691091
								0.00839322	-0.00171225	0.392501	0.0427304
								0.0683801	0.443855	-0.00621871	0.0889467
								0.0130165	0.0323181	0.276535	-0.00194608
								0.0060102	-0.0148248	0.089725	0.0295938
								0.215584	-0.00124101	0.000811425	0.0371257
								0.169633	0.00310541	0.00256878	0.212917
								-0.00558338	0.0705032	0.00355437	0.0162087
								0.102509	0.244947	7.85719e-05	0.0532663
								-0.012201	0.0528968	0.192929	0.0979649
								-0.00389874	-0.00647865	0.095753	-0.0038952
								-0.000595838	0.00277981	0.604301	0.201339
								-0.018321	0.091779	0.000724696	0.171678
								0.125088	0.0219721	0.0753101	0.00197554
								0.223452	0.215377	0.0002711	0.0117832
								0.00101679	0.00806631	0.0774722	0.0228314
								0.176868	0.124939	0.252991	0.146539
								0.0365296	0.0856923	0.0905025	0.125817
								0.214658	0.00263459	-0.00139061	0.00605269
								0.00238927	-0.0133505	0.0204993	0.0175007
								0.0909849	0.140934	0.128961	0.0204545
								0.212472	0.216832	0.00278982	0.0491399
								0.314194	0.0864075	0.038511	0.216806
								0.118989	0.0334467	-0.000108589	0.108371
								0.0313053	-0.00519187	-9.00701e-05	0.032373
								-0.0042501	0.280108	0.0865548	0.00646066
								0.0257549	-0.0129355	0.0263366	0.131868
								0.145172	0.427261	-0.000155979	0.10401
								-0.00101364	0.376747	0.0559962	0.000391246
								0.0804323	-0.0161383	-0.00244342	0.0323926
								0.0063153	0.00054475	0.00447843	0.000184787
								0.39292	0.0544435	0.0897055	-0.0248775
								0.000217537	0.208058	0.675101	-0.000440383
								0.000573385	-0.0136548	-7.65765e-05	0.0402281
								0.000486002	0.0285796	0.23067	-0.00256955
								0.00158773	0.116062	0.0608892	0.100672
								-0.0113744	0.242224	-0.0105208	0.031506
								0.0222637	0.0711433	0.000439705	0.00115879
								-0.0390884	0.159136	0.00139422	0.00209544
								0.361276	-0.00792092	9.99951e-05	0.00330833
								-0.00162705	0.00159707	0.0929202	0.000204275
								0.0492741	-0.000651526	-0.00497101	0.0124681
								0.178417	0.208341	0.00121366	-0.0227405
								0.300939	-0.00562542	0.00029551	0.124422
								0.00105021	0.339359	0.17362	0.127924
								0.085102	-0.00464799	0.001237	-0.0403185
								0.000510844	0.0387704	0.0449453	0.114893
								0.000136258	0.568906	0.104656	0.0558101
								0.0237578	-1.78999e-05	0.0569785	0.0904687
								0.0129065	0.00115139	0.00287714	0.0159178
								-0.00300266	0.118057	-0.00294404	0.030097
								-0.00772515	0.121907	-0.0398034	0.109616
								-0.00845099	0.0380174	0.709059	-0.00449787
								-0.00355576	2.13049e-05	-0.00113425	-0.0230124
								0.576246	-0.0133289	-0.00155854	0.00676501
								0.210153	0.0222515	0.000516309	0.145492
								0.0962036	-0.00173217	0.00625066	0.270336
								0.00313564	0.0313378	-0.0160676	0.389461
								0.338027	0.13744	-0.00319942	-0.000208815
								0.0899918	-0.00841592	0.143646	0.0139697
								0.000148127	0.263092	0.31573	0.16649
								-0.00129601	-0.00173711	-0.0180281	0.0810691
								-0.00377107	0.215303	0.220524	0.00021814
								0.0314391	0.10586	-0.00770891	0.0218573
								0.00591274	0.0969136	0.005046	0.00690701
								0.00820333	0.38678	0.0881036	-0.0102503
								0.00285932	0.011129	0.00252869	-0.010704
								0.030057	0.575045	0.19195	0.0358391
								0.0197435	0.00257252	0.00517901	0.253092
								-0.00223686	0.454638	0.00220825	0.260503
								-0.0933947	0.241506	0.0854858	0.115631
								-0.00196739	0.00238071	0.322048	-0.00135411
								0.0069483	0.22988	0.0396519	0.205364
								0.00278827	0.209531	0.000684912	0.0060983
								0.0835621	0.0474657	0.0557085	-0.0019074
								0.0175259	0.0281878	0.165908	0.00368366
								0.0997365	0.0432482	0.00344973	-0.000227792
								0.00603842	0.053063	-1.74818e-05	0.0496615
								0.00480155	0.208593	0.0398615	0.00169993
								-0.00995636	0.106762	-0.00229456	0.012643
								-0.00121067	0.00632501	0.000287897	0.3592
								0.0314171	-0.00071956	-0.000735234	0.228045
								0.151556	-0.00899397	0.18034	0.00525128
								0.00114194	-0.00887176	0.171434	0.015441
								0.0985124	0.12173	0.0963441	0.00629439
								-0.000677104	0.996705	-0.00295433	0.00246456
								0.0610434	0.0197527	0.00367638	0.0996792
								0.0169134	0.308303	0.261677	0.00366056
								0.585318	0.0155201	0.00261226	0.0296964
								0.011066	0.00422436	-0.00262011	0.00498752
								-0.000692791	0.251167	0.0401001	0.0612454
								-0.000465565	-0.00645919	0.05039	0.114412
								-0.0836055	0.00011872	6.77105e-05	0.128068
								0.146131	-0.000155269	0.00345184	0.0965451
								0.000932092	0.00119871	-0.0010735	0.0592088
								-0.0142617	-0.00293243	0.042356	-0.00367461
								0.0138219	-0.0110795	-0.0115251	-0.0256213
								-0.00133853	0.214027	-0.00455513	-0.0108587
								-0.00392486	0.00512328	0.41274	0.0341367
								0.14729	0.0313274	0.0040999	0.480563
								0.00532057	0.205362	0.0027412	0.0150711
								0.0249524	0.182525	0.0627895	0.0110973
								0.0255266	0.0669254	0.000415209	0.00177649
								0.00178164	0.312824	0.0595195	0.149339
								0.277378	-0.0110057	0.00147959	-0.00328481
								0.109246	-0.00239789	0.000443	0.14627
								-0.00272961	0.0118863	0.446044	-0.000814093
								-0.0256695	0.000480104	-0.00976749	0.653913
								0.222284	0.16276	0.0179621	0.00687255
								0.139708	0.0578677	0.0859307	0.0120803
								0.0359747	-0.00275661	0.115956	0.0118005
								-0.00380624	0.61301	0.00396068	0.0272906
								0.000234016	0.0599873	0.146639	0.287437
								-0.00312683	0.0835391	0.270926	0.00918994
								0.00423021	-0.00289692	0.376703	0.244293
								0.157758	0.0334059	-0.0120812	-0.00108661
								0.0275693	-0.000510239	-0.0206348	0.0244534
								0.510489	-0.00593876	0.00303077	0.0404962
								0.0026368	-0.0163114	0.18303	0.00242696
								0.320708	0.225625	0.183452	0.220079
								0.0121148	0.0884054	0.000525875	0.173823
								0.174624	0.00651275	-0.0282879	-0.0365338
								0.0522683	0.00204838	0.00448357	0.00416525
								0.134693	-0.0026872	0.13311	0.0710073
								0.065055	0.054439	0.0868389	0.182579
								-0.0100332	0.000332006	0.176987	0.0678163
								0.160721	0.171817	0.0609779	0.328294
								-0.00352095	-0.00374044	0.404954	0.0014106
								0.0643708	0.501004	-0.00290058	0.00331984
								0.108604	0.263	0.00616071	0.025819
								-0.00166162	-0.00104022	0.000470295	0.0904454
								0.179366	-0.000971289	0.0717482	0.498271
								-0.00188889	0.00665173	0.0638524	0.0985084
								0.0110359	-0.000585036	-0.0219478	0.0810825
								0.142934	0.100177	0.517261	0.049699
								0.0679165	0.00614494	0.000905068	0.352577
								0.00164752	0.00793344	0.00929418	0.264036
								0.00136808	0.269539	-0.00159091	0.00964007
								0.00532406	0.353901	0.11818	1.16207
								0.0106037	0.276374	-0.00521217	0.480408
								0.00347741	0.00574588	0.0152058	0.0679474
								-0.000492654	0.224498	0.114269	-0.00320357
								0.0244064	-0.00164827	0.0929447	0.116604
								0.0360146	0.0516859	0.250772	0.0417403
								0.0346002	0.0380342	-0.00143434	0.162822
								0.0824522	-0.00503633	0.0238379	0.137813
								0.00243715	-0.00790872	0.200312	0.779327
								0.000229262	0.00152904	0.00246457	0.394491
								0.0162209	0.137772	-0.00173918	-6.36846e-05
								-0.00157864	-0.000528896	0.108024	0.158626
								-0.0126596	0.0112491	0.100814	0.104195
								0.0931889	0.171878	0.00250287	0.408659
								0.00461372	-0.0030172	0.366337	0.0783582
								0.0235896	-0.0356691	0.0364005	0.158862
								0.0294552	-0.0842116	-0.00205282	0.00179575
								-0.000952035	0.0497169	0.00918587	0.0632919
								0.0351758	0.00841581	-0.073746	0.0448826
								-0.00098096	-0.00266933	0.0456451	0.00155145
								0.00755719	0.227821	0.025744	0.0255268
								0.0299323	0.00260449	0.0299845	0.289229
								-0.00176485	0.0993571	0.00019854	0.00327241
								-0.000977605	-0.00341242	0.32172	0.186934
								0.131034	0.00938353	0.199435	0.0491234
								0.0374341	0.591111	0.000671241	0.0745157
								-0.000487495	0.475124	0.000374245	0.369787
								0.000148982	-0.0246407	-0.00376292	0.0302163
								0.210308	0.647771	8.7063e-05	0.00475236
								0.240776	0.0624885	-0.000539718	0.00667355
								0.0105934	0.388992	1.13304e-05	0.156632
								-0.0162527	0.00978922	0.00277151	0.0672041
								-0.0134123	-0.00689317	0.0509084	0.0990202
								-0.0502389	0.0486686	0.0506226	0.00228279
								0.0650203	0.198254	-0.00208607	0.0256392
								-0.00502141	-0.0248943	0.00512141	1.47425e-05
								0.337903	0.00138247	0.000923834	0.00151642
								0.0101294	0.0191533	0.0068015	0.0183704
								0.417587	0.176388	-0.0479821	0.038644
								-0.00377006	-0.0461268	0.0034731	0.00124067
								0.0226559	-0.00061298	-0.00338561	0.0897369
								-0.0138216	-0.00410543	0.353376	0.000680582
								0.00289084	0.0917297	0.0026372	0.00318221
								0.0028067	0.141694	0.0813636	0.552437
								-0.0172139	0.00108584	0.188266	0.263411
								0.00755373	0.0829008	0.00516519	0.0113342
								-0.00500623	-0.0374026	-0.0015357	0.0968648
								0.0207573	0.00113172	0.0283805	0.00445183
								0.0696429	-0.00308239	-0.000495456	0.468661
								0.0441287	0.0192874	-0.00792628	0.00357224
								-0.000588457	0.00983201	0.00431962	-0.0469529
								0.00988307	0.3168	-0.0070942	0.101426
								0.000502667	0.169973	-0.00203773	-0.0185794
								0.00544874	0.296044	0.0230042	0.0850986
								0.0129693	0.181078	-0.000859242	-0.0321864
								0.00822191	0.490796	0.00166761	0.0104233
								0.0381325	0.144544	0.0219369	0.000543128
								0.0746295	0.000383244	-0.00210759	0.0715107
								0.143433	-0.000121009	0.165118	0.0458708
								0.21773	0.00531748	-0.00454515	0.00185439
								0.00633555	-0.00319129	0.323669	0.00708363
								-0.0193094	0.421794	0.00162167	0.00688942
								0.00366186	0.0129449	0.134036	-0.0011065
								0.00830695	0.0948633	0.0323489	0.00503565
								0.0519565	-0.0553092	-0.00794939	0.47811
								0.0335061	0.340438	0.0693446	0.24053
								0.000163916	0.00881804	0.012316	0.354924
								-0.00315304	-0.000108154	0.00061051	-0.00317623
								0.000425617	0.0540786	0.23929	0.220334
								0.0257378	0.0193221	0.0816154	0.0211822
								-0.00138568	0.0989355	0.0137103	-0.0436971
								0.000707707	0.030784	0.0506491	0.0170784
								0.0627192	0.220253	0.0215907	0.00106182
								0.244695	-0.0232993	-0.0351186	0.0010441
								0.289321	0.167108	0.00107359	-6.98641e-05
								0.0329268	0.0519177	-0.000104154	0.296534
								0.00243427	0.0615588	0.0605792	-0.00115939
								0.00994463	0.300059	0.0611983	0.15536
								-0.00672528	0.0237047	0.176546	0.128702
								0.000899591	0.0102445	0.00290991	0.175149
								-0.0154817	0.00278194	0.0186683	-0.00788319
								0.00315452	0.00547153	0.129984	0.0105738
								0.00472734	0.00428086	0.0487429	0.136777
								0.000160079	0.000628047	0.0311568	0.181387
								-0.00292025	0.223594	0.00940022	0.00180143
								0.0022575	0.00320005	0.220062	0.0936839
								0.0275145	-0.000278818	0.00609335	0.0184749
								0.0512352	0.0647117	0.276497	0.00138747
								0.00109148	-0.00365079	0.0518993	0.448568
								0.000898659	0.00706756	-0.00968615	0.0497869
								0.00449833	0.0128941	0.296362	-0.00055657
								0.0159417	0.024612	-0.00103016	0.00107104
								0.400106	0.213774	0.0402792	0.017557
								0.0110032	-0.00240845	0.0262591	-0.000329115
								0.00142004	-0.00310276	0.0866759	0.000600983
								0.101048	0.00196369	0.365975	-0.00355965
								-0.000771169	0.120039	-0.00398444	0.048719
								0.0253072	0.0105603	0.000361387	0.00508968
								-0.000883509	0.112294	0.00187163	-0.000236477
								0.176839	0.0280144	0.000366086	0.189568
								0.064571	0.232592	0.00719517	-0.00102728
								0.00284921	0.109089	0.0599543	0.452803
								-0.0368452	0.0619806	0.0870095	0.0394665
								0.0158701	0.359438	0.00738907	0.29898
								0.177783	-0.00806646	0.00173419	0.00568571
								0.00503373	0.385588	0.01131	0.00609879
								0.0638973	0.000541513	0.0152149	0.0096663
								0.0939906	0.0256879	0.0212258	0.193232
								0.403463	0.0202139	-0.000441211	-0.0011532
								-0.00222236	0.000719866	0.0389497	-0.00304339
								-0.0107531	0.496426	6.19907e-06	-0.000696979
								-0.00247693	0.00823649	0.659392	0.022186
								0.273141	-0.0024142	0.00110258	-0.00295392
								0.0202226	0.366019	0.00534283	0.00206706
								0.00319024	0.0171462	0.0289186	0.0403164
								-0.0047261	0.0171183	0.0009411	-0.0105004
								0.0582704	-0.00156167	-0.00520122	0.00103592
								0.00969988	0.427509	-0.0043569	0.00625739
								-0.0017526	0.589354	0.00865501	0.00764358
								0.00106025	0.0471744	0.000879645	-0.0265174
								0.351263	0.024597	0.00224201	0.00107748
								0.535675	0.0880022	0.0232568	-0.00303844
								0.0877261	0.00456648	0.00220317	0.213327
								0.0110924	0.178219	-0.000859824	-0.0102717
								0.00217181	0.00660942	0.00169201	-7.46825e-06
								0.00242344	-0.0511552	0.00161881	0.379458
								0.0523091	0.162792	-0.00103889	0.00395586
								-0.00350871	0.126254	0.426527	-0.00364714
								0.535929	0.00188035	-0.00147819	0.00104911
								0.0385563	0.681726	-0.00125138	-0.0140061
								-0.0110697	0.151478	0.40314	-0.0327018
								0.000609821	0.155379	0.00827701	0.190421
								0.511496	0.00314006	0.108802	-0.00570466
								0.000197683	0.0943588	0.000778251	0.0422206
								0.298143	-0.0129072	0.0764053	0.10208
								0.0297969	-0.000919908	-0.00059323	0.503406
								0.0339169	0.0176194	0.00062094	0.0026995
								-0.000191077	-0.000258471	-0.00828122	0.000190002
								0.00138811	0.0562368	0.00522451	0.184783
								0.000594974	0.0356521	0.000480137	0.021903
								0.185737	0.0499086	0.364177	0.00300663
								0.0690495	0.351606	0.0679586	0.100093
								0.00336622	0.543775	0.0465456	0.145318
								0.0150413	0.11422	0.455524	0.0872295
								0.00342969	0.104353	0.156033	0.00403554
								-0.00164226	0.000553411	-0.00616167	0.141389
								0.107229	0.012811	0.116123	0.202009
								-0.0303619	0.0401597	0.000354976	0.461788
								-0.000749156	0.000511367	0.159963	0.336243
								-0.0233506	0.035766	0.156986	0.209557
								-0.0151606	0.0224371	0.0039626	0.00718929
								0.091681	0.123876	0.165304	0.00027998
								0.0526642	0.0134276	0.000640893	-0.0519987
[truncated: 156,107 more rows]
