# Supplementary material for: Discrete spatial organization of TGFβ receptors couples receptor multimerization and signaling to cellular tension
Source: eLife journal article supplement (doi:10.7554/elife.09300), 2015-12-10
Supplement: supp [file Readme.pdf › Figure 2 - Source data/Readme.pdf]

This zip contains representative sptPALM imaging sequences of mEos2-labeled T $\beta$ RI and T $\beta$ RII in ATDC5 cells (50 frames, 10 frames/sec) and their corresponding tracking analysis outputs (track number, frame, x and y coordinates).
