# Supplementary material for: Discrete spatial organization of TGFβ receptors couples receptor multimerization and signaling to cellular tension
Source: eLife journal article supplement (doi:10.7554/elife.09300), 2015-12-10
Supplement: supp [file TBR2 R1C5 50frames.xlsx]

## Sheet: Cell5 data
Track Number	Frame	X coordinate	Y coordinate
1	0	383.369	1.581
1	1	383.626	1.622
1	2	383.756	1.575
1	3	383.711	1.572
1	4	383.61	1.575
1	5	383.633	1.671
1	6	383.638	1.644
1	7	383.804	1.67
1	8	383.508	1.642
2	0	111.251	3.714
2	1	110.859	3.937
2	2	110.963	3.505
2	3	111.107	3.743
2	4	111.21	3.967
2	5	111.311	3.676
2	6	111.69	3.709
2	7	111.018	3.634
2	8	111.413	3.999
2	9	111.647	3.611
2	10	111.585	3.687
2	11	111.479	3.565
2	12	111.712	4.136
2	13	110.841	3.733
2	14	111.042	3.659
2	15	111.454	3.616
2	16	111.226	3.682
2	17	110.95	3.919
2	18	111.438	3.679
2	19	111.255	4.067
2	20	111.368	3.528
2	21	111.484	4.118
2	22	110.926	3.819
2	23	111.222	3.739
2	24	110.846	3.703
2	25	111.445	4.088
2	26	111.441	3.906
2	27	111.516	4.016
2	28	111.292	3.298
2	29	111.035	3.67
2	30	111.16	3.988
2	31	111.209	3.686
2	32	111.199	4.062
2	33	110.948	3.748
2	34	111.204	3.89
2	35	111.003	3.73
2	36	111.513	3.97
2	37	111.373	3.871
2	38	111.224	3.748
2	39	111.532	3.792
2	40	111.348	3.723
2	41	110.808	3.587
2	42	110.988	3.47
2	43	111.779	4.005
2	44	111.514	4.094
2	45	111.393	3.696
2	46	111.368	3.782
2	47	110.617	3.711
2	48	111.185	3.983
2	49	111.346	3.889
3	0	268.892	10.063
3	1	268.847	10.303
3	2	269.447	10.427
3	3	269.533	9.76
3	4	269.261	10.686
3	5	269.673	10.634
3	6	269.266	9.848
3	7	268.675	9.955
3	8	269.579	9.454
3	9	269.095	10.03
3	10	269.476	10.054
3	11	269.421	9.909
3	12	269.313	10.403
3	13	269.453	9.821
3	14	268.44	9.586
3	15	268.866	10.076
3	16	269.751	10.02
3	17	269.785	10.23
3	18	269.186	10.261
3	19	269.093	9.969
3	20	269.841	10.253
3	21	269.755	9.906
3	22	269.341	10.275
3	23	269.193	10.077
3	24	269.21	9.967
3	25	269.945	9.893
3	26	268.672	10.12
3	27	269.14	9.598
3	28	268.331	9.427
4	0	420.874	10.315
4	1	420.681	10.107
4	2	421.019	10.064
4	3	420.672	10.208
4	4	420.843	10.117
4	5	420.799	10.261
4	6	420.833	10.033
4	7	420.699	9.801
4	8	420.625	10.314
4	9	421.024	10.303
4	10	421.074	10.299
4	11	420.595	10.255
4	12	420.908	9.931
4	13	420.643	9.941
4	14	420.403	9.672
4	15	420.797	10.195
4	16	420.992	10.235
4	17	420.752	9.838
4	18	420.599	10.223
4	19	420.542	10.112
4	20	420.692	9.909
4	21	421.049	10.109
4	22	421.072	10.118
4	23	420.6	9.94
4	24	420.631	9.818
4	25	420.717	9.798
4	26	420.719	9.878
4	27	420.45	10.045
4	28	420.705	9.73
4	29	420.687	10.021
4	30	420.743	10.176
4	31	420.89	10.107
4	32	420.761	9.74
4	33	420.553	10.264
4	34	420.7	10.01
4	35	420.452	9.935
4	36	420.653	9.935
4	37	420.757	9.926
4	38	420.73	9.958
4	39	420.754	10.196
4	40	420.801	9.788
4	41	420.708	10.207
4	42	420.923	10.24
4	43	420.809	10.248
4	44	420.607	9.997
4	45	420.512	10.05
4	46	420.705	10.15
4	47	420.793	9.955
4	48	420.615	9.617
4	49	420.959	9.667
5	0	98.524	14.091
5	1	99.061	13.475
5	2	98.788	13.643
5	3	98.098	13.444
6	0	342.508	13.248
6	1	342.034	13.064
6	2	342.227	13.13
6	3	342.32	12.834
6	4	341.924	13.049
6	5	342.048	13.108
6	6	342.578	13.424
6	7	342.111	13.11
6	8	341.929	12.586
7	0	398.404	14.11
7	1	398.401	14.239
7	2	398.048	14.218
7	3	397.944	14.371
7	4	398.544	14.216
7	5	398.608	14.317
7	6	398.293	14.378
7	7	398.557	13.192
7	8	398.772	13.552
7	9	398.368	14.016
7	10	398.942	13.391
7	11	398.547	11.98
7	12	398.772	11.571
7	13	398.523	13.261
7	14	398.485	13.16
8	0	293.534	18.158
8	1	293.762	18.261
9	0	454.189	26.271
9	1	454.048	26.293
9	2	454.317	26.743
9	3	453.926	26.909
9	4	454.331	26.44
9	5	454.269	26.668
9	6	454.339	26.851
9	7	454.36	26.388
9	8	454.555	26.046
9	9	454.288	26.301
9	10	454.208	25.959
9	11	453.627	25.932
9	12	454.211	26.992
9	13	454.041	26.868
9	14	454.549	26.253
9	15	454.243	26.546
9	16	454.702	26.415
9	17	454.376	26.505
9	18	454.139	26.554
9	19	453.889	26.581
9	20	454.373	26.531
9	21	454.274	26.547
9	22	453.958	26.434
9	23	454.63	27.033
9	24	454.089	26.78
9	25	454.469	26.698
9	26	454.489	27.01
9	27	454.498	26.92
9	28	453.978	26.627
9	29	454.542	27.206
9	30	454.43	26.623
9	31	454.221	26.497
9	32	453.701	26.632
9	33	454.174	26.113
9	34	454.119	26.669
9	35	454.069	26.405
9	36	454.172	27.068
9	37	454.291	26.811
9	38	454.154	26.509
9	39	454.142	26.748
9	40	454.634	26.703
10	0	20.511	27.117
10	1	20.944	26.311
10	2	20.713	27.236
10	3	19.709	27.424
10	4	20.721	26.744
10	5	19.515	26.196
10	6	19.718	26.584
11	0	258.706	31.569
11	1	257.899	31.074
11	2	257.445	30.697
12	0	285.61	37.071
12	1	287.663	38.712
12	2	288.182	37.929
12	3	286.593	38.231
12	4	287.612	38.541
12	5	288.973	40.249
12	6	290.397	42.645
12	7	289.853	41.674
12	8	288.547	43.052
12	9	288.397	44.495
12	10	289.246	47.216
12	11	288.008	49.624
13	0	121.95	41.803
13	1	122.062	41.606
13	2	121.972	41.315
13	3	122.044	41.293
13	4	121.891	41.357
13	5	121.849	41.598
13	6	121.654	41.489
13	7	122.054	41.822
13	8	122.315	41.255
13	9	122.058	41.655
13	10	122.207	41.811
13	11	121.748	41.685
14	0	180.871	54.293
14	1	181.323	54.647
14	2	181.751	54.774
14	3	181.519	54.259
14	4	181.456	54.485
14	5	181.631	53.693
14	6	181.606	54.58
14	7	181.682	54.174
14	8	181.521	54.153
14	9	181.264	54.499
14	10	181.139	54.773
14	11	181.094	54.632
14	12	181.618	54.317
14	13	181.322	54.947
14	14	181.583	54.84
14	15	181.025	54.48
14	16	181.73	54.422
14	17	181.559	54.538
14	18	181.322	54.677
14	19	181.748	54.476
14	20	181.625	54.545
14	21	181.787	54.455
14	22	181.72	54.218
14	23	181.142	54.616
14	24	181.441	54.455
14	25	181.398	54.689
14	26	181.399	54.613
14	27	181.362	54.461
14	28	181.583	54.43
14	29	181.533	54.585
14	30	181.636	54.422
14	31	181.453	54.837
14	32	181.601	54.355
14	33	181.352	54.743
14	34	181.632	54.751
14	35	181.713	54.495
14	36	181.489	54.504
14	37	181.288	54.643
14	38	181.603	54.579
14	39	181.812	54.347
14	40	181.904	54.584
14	41	181.325	54.476
14	42	181.514	54.125
14	43	181.129	54.315
14	44	181.467	54.518
14	45	181.836	54.474
14	46	181.402	54.302
14	47	181.817	54.619
14	48	181.456	54.371
14	49	181.838	54.396
15	0	329.57	54.103
15	1	329.561	54.151
16	0	73.73	68.681
16	1	74.377	68.487
16	2	74.283	68.73
16	3	74.255	68.582
16	4	74.231	68.728
16	5	73.588	68.602
16	6	74.282	68.74
16	7	73.844	68.211
16	8	74.471	68.657
16	9	73.861	68.686
16	10	73.839	68.693
16	11	73.964	68.932
16	12	74.237	68.591
16	13	74.256	68.708
16	14	74.319	68.735
16	15	74.265	68.32
16	16	74.136	68.702
16	17	73.839	68.501
16	18	73.792	68.375
16	19	74.351	68.919
16	20	73.929	68.669
16	21	74.214	68.784
16	22	74.37	68.775
16	23	74.314	68.534
16	24	74.122	69.05
16	25	73.921	68.89
16	26	74.168	68.579
16	27	74.252	68.683
16	28	74.076	68.775
16	29	74.251	68.546
16	30	74.16	68.736
16	31	74.481	68.524
16	32	73.978	68.59
16	33	74.097	69.061
16	34	74.288	68.559
16	35	74.243	68.64
16	36	74.297	68.378
16	37	74.132	69.101
16	38	73.566	68.487
16	39	74.194	68.94
16	40	74.458	68.91
16	41	74.181	68.499
16	42	73.77	69.05
16	43	73.91	68.616
16	44	73.751	68.814
16	45	73.296	68.732
17	0	269.053	70.272
17	1	270.167	70.335
17	2	269.7	71.628
18	0	177.368	74.192
18	1	177.275	73.268
18	2	177.503	73.416
18	3	177.471	73.454
19	0	255.943	75.349
19	1	257.808	74.543
20	0	166.351	84.931
20	1	166.414	84.446
20	2	166.469	84.444
20	3	166.381	84.769
20	4	165.622	84.009
20	5	166.331	83.767
20	6	166.397	83.813
20	7	166.579	84.538
20	8	166.337	84.13
20	9	166.107	84.149
20	10	165.812	84.239
21	0	23.236	87.603
21	1	23.334	87.39
21	2	22.866	87.464
21	3	23.418	86.805
21	4	22.754	87.462
21	5	22.875	87.361
21	6	22.603	88.244
21	7	23.001	87.613
21	8	22.914	87.571
21	9	23.071	87.366
21	10	23.306	87.569
21	11	23.145	87.537
21	12	23.11	87.364
21	13	23.202	87.356
21	14	22.725	87.58
21	15	22.636	87.446
21	16	23.21	87.428
21	17	22.659	87.544
21	18	22.856	87.311
21	19	22.597	87.521
21	20	23.224	86.728
21	21	22.653	87.554
21	22	22.594	88.119
21	23	23.031	87.529
21	24	22.724	88.05
21	25	22.718	87.629
21	26	23.169	87.579
21	27	23.429	87.485
21	28	23.547	87.425
21	29	23.286	87.68
21	30	22.819	87.734
21	31	22.679	88.039
21	32	23.095	87.804
21	33	22.62	87.756
21	34	23.11	88.224
21	35	22.794	87.942
21	36	22.699	87.72
21	37	23.071	87.512
21	38	22.777	88.147
21	39	23.1	87.692
21	40	22.896	88.181
21	41	22.65	88.053
21	42	23.052	87.619
21	43	23.143	87.371
21	44	22.826	87.707
21	45	23.084	88.012
21	46	22.825	88.36
21	47	22.617	87.312
21	48	22.822	87.638
21	49	23.244	87.802
22	0	124.279	107.049
22	1	123.87	108.612
22	2	122.503	107.758
23	0	162.682	109.144
23	1	162.354	108.793
24	0	180.38	110.667
24	1	179.528	108.372
24	2	179.674	105.833
25	0	261.465	113.063
25	1	261.743	113.086
25	2	261.997	112.36
25	3	262.14	112.825
25	4	261.826	112.254
25	5	262.118	112.725
25	6	261.792	112.755
25	7	261.298	112.621
25	8	261.267	112.348
25	9	262.491	112.239
25	10	262.169	112.988
26	0	197.12	115.921
26	1	197.156	115.671
26	2	196.974	116.071
27	0	332.816	118.888
27	1	332.837	118.325
27	2	334.177	118.202
27	3	335.361	116.264
27	4	334.789	115.962
27	5	334.65	116.004
27	6	334.083	115.998
27	7	334.617	115.638
27	8	333.957	115.872
27	9	336.266	115.79
27	10	333.875	115.059
27	11	333.512	115.393
27	12	334.625	115.561
27	13	334.72	115.196
28	0	345.202	119.255
28	1	343.429	119.282
28	2	342.252	118.373
28	3	342.542	117.183
29	0	123.254	122.233
29	1	123.485	122.206
29	2	124.035	122.089
29	3	124.122	121.926
29	4	122.799	123.315
29	5	123.14	122.749
29	6	123.518	122.568
29	7	122.35	122.47
29	8	123.988	121.588
29	9	123.426	122.079
29	10	122.636	123.067
29	11	122.553	122.765
29	12	122.512	122.389
29	13	122.836	122.964
29	14	122.751	122.605
29	15	124.553	121.317
29	16	122.874	122.466
29	17	122.819	122.558
29	18	122.751	122.591
29	19	123.383	123.35
29	20	122.997	123.132
29	21	122.929	123.02
29	22	123.119	124.23
29	23	123.428	122.939
29	24	122.605	123.077
29	25	124.2	120.611
29	26	125.378	121.489
30	0	152.667	121.624
30	1	152.743	122.494
30	2	152.642	122.256
30	3	152.688	122.356
31	0	115.697	125.585
31	1	116.455	125.263
31	2	116.65	126.363
31	3	114.618	128.054
31	4	111.915	127.329
31	5	112.63	127.275
32	0	299.53	127.92
32	1	298.878	127.792
32	2	298.061	128.32
32	3	297.665	128.312
33	0	398.57	134.672
33	1	400.951	136.267
34	0	220.263	135.962
34	1	220.789	137.423
34	2	220.292	139.31
35	0	156.387	137.371
35	1	155.92	137.298
35	2	156.192	138.113
35	3	155.65	137.934
35	4	156.251	138.393
35	5	155.796	138.844
36	0	377.397	137.512
36	1	376.84	136.529
36	2	377.24	137.497
36	3	378.055	136.373
36	4	376.736	137.265
36	5	376.96	137.578
36	6	376.615	137.691
36	7	376.442	138.445
36	8	375.731	137.642
36	9	376.285	137.578
36	10	375.87	138.236
36	11	376.458	137.959
36	12	376.613	138.457
36	13	375.814	138.036
36	14	375.599	138.184
36	15	374.914	138.389
36	16	375.488	138.275
36	17	375.387	138.031
36	18	376.674	137.536
36	19	377.354	137.453
36	20	376.843	137.472
36	21	376.936	137.454
36	22	377.479	137.758
36	23	376.32	137.403
36	24	376.697	137.482
36	25	377.859	137.608
37	0	126.478	138.173
37	1	126.392	137.578
37	2	127.08	137.36
37	3	126.754	137.15
37	4	127.329	136.939
37	5	126.985	137.528
38	0	253.039	140.273
38	1	252.966	139.662
39	0	397.555	145.704
39	1	397.38	146.398
39	2	396.907	145.997
39	3	397.626	145.505
40	0	235.035	146.588
40	1	236.966	146.141
40	2	237.661	148.087
40	3	237.617	149.429
40	4	236.682	150.436
41	0	289.618	150.431
41	1	289.789	150.458
41	2	289.604	150.325
41	3	289.31	150.599
41	4	289.624	150.56
41	5	289.427	151.162
41	6	289.683	150.57
41	7	289.624	150.499
42	0	390.878	150.505
42	1	390.591	150.975
42	2	390.632	150.936
42	3	390.712	150.814
42	4	390.93	151.051
42	5	390.955	151.248
42	6	390.969	150.969
42	7	390.799	150.586
42	8	390.786	150.389
42	9	390.717	150.899
42	10	390.759	150.909
42	11	390.652	150.591
42	12	390.845	151.111
42	13	390.46	150.72
42	14	390.702	150.712
42	15	390.787	150.872
42	16	390.477	152.256
42	17	390.856	150.757
42	18	390.708	150.888
42	19	391.04	150.659
42	20	391.276	151.224
43	0	411.111	151.506
43	1	408.904	150.278
43	2	408.775	150.038
44	0	340.623	153.003
44	1	341.188	153.206
45	0	441.525	155.505
45	1	441.308	155.397
46	0	113.073	156.189
46	1	113.9	156.271
47	0	426.81	156.442
47	1	426.884	156.585
48	0	450.772	157.77
48	1	450.392	157.646
48	2	450.317	157.259
48	3	449.359	155.902
49	0	356.091	158.157
49	1	356.372	158.601
50	0	251.315	158.992
50	1	250.166	158.224
50	2	249.823	157.457
50	3	251.342	158.893
51	0	330.76	158.716
51	1	328.598	157.893
52	0	324.786	160.587
52	1	325.732	160.473
52	2	325.44	160.084
53	0	122.364	161.116
53	1	122.695	161.133
53	2	122.693	161.304
53	3	122.659	161.248
53	4	122.69	160.962
53	5	122.626	161.033
53	6	122.581	161.187
53	7	123.095	161.132
53	8	122.8	160.8
53	9	122.901	161.475
53	10	122.625	161.339
53	11	123.257	161.32
53	12	123	161.666
53	13	122.761	161.403
53	14	122.715	161.456
53	15	122.746	161.621
53	16	122.775	161.729
53	17	122.524	161.441
53	18	122.555	161.558
53	19	122.618	161.451
53	20	122.826	161.667
53	21	122.735	161.699
53	22	122.721	161.527
53	23	122.839	161.446
53	24	122.873	161.449
53	25	122.757	161.393
53	26	122.7	161.485
53	27	122.975	161.542
53	28	122.83	161.671
53	29	122.906	161.332
53	30	122.912	161.329
53	31	123.085	161.379
53	32	123.096	161.196
53	33	122.98	161.354
53	34	123.012	161.348
53	35	122.926	161.436
53	36	123.061	161.448
53	37	122.923	161.528
53	38	123.065	161.527
53	39	122.906	161.088
53	40	123.192	161.367
53	41	123.166	161.366
53	42	123.317	161.386
53	43	122.814	161.501
53	44	123.143	161.497
53	45	123.375	161.568
53	46	123.332	161.484
53	47	123.149	161.361
53	48	123.394	161.454
53	49	123.138	161.41
54	0	400.902	164.745
54	1	400.637	164.456
54	2	400.931	164.562
54	3	400.481	165.072
54	4	401.112	164.589
54	5	400.904	164.474
54	6	401.154	165.344
54	7	401.057	164.505
55	0	130.532	169.596
55	1	130.296	169.68
55	2	130.173	170.161
55	3	130.167	170.042
55	4	130.144	170.247
55	5	130.234	170.453
55	6	130.204	170.924
55	7	130.245	170.513
55	8	130.239	170.443
55	9	130.419	170.431
55	10	130.279	170.654
55	11	130.312	170.329
55	12	130.51	170.077
55	13	130.377	170.28
55	14	129.824	169.892
55	15	129.874	170.492
55	16	130.278	170.322
55	17	130.404	169.728
55	18	130.384	170.024
55	19	130.426	169.363
55	20	130.343	169.486
55	21	130.203	169.538
55	22	130.558	169.498
55	23	131.33	170.105
55	24	131.168	169.803
55	25	131.218	169.768
55	26	130.474	170.339
55	27	129.852	169.866
55	28	129.673	170.32
55	29	129.757	170.485
55	30	130.508	170.308
55	31	130.312	170.379
55	32	130.45	170.463
55	33	130.255	170.457
55	34	130.139	170.285
55	35	129.82	170.273
55	36	130.039	170.621
55	37	130.376	170.731
55	38	130.151	170.8
55	39	130.18	170.749
55	40	129.769	170.953
55	41	129.67	171.085
55	42	130.335	170.992
55	43	129.936	170.388
55	44	129.777	169.856
55	45	130.19	170.616
55	46	130.249	170.487
55	47	129.795	170.538
55	48	130.554	170.344
55	49	130.316	170.672
56	0	146.551	170.526
56	1	147.308	169.69
57	0	325.752	178.356
57	1	325.935	178.795
57	2	326.619	179.539
58	0	358.461	178.19
58	1	359.494	177.801
59	0	137.64	183.005
59	1	137.886	182.419
59	2	137.56	182.575
59	3	137.494	182.658
59	4	137.809	183.059
60	0	273.086	186.166
60	1	272.429	186.386
60	2	273.082	188.531
61	0	437.08	186.186
61	1	437.02	186.298
61	2	437.741	186.876
61	3	436.826	186.175
61	4	436.361	186.432
61	5	436.945	187.288
61	6	436.834	186.397
61	7	436.731	186.644
62	0	450.591	187.672
62	1	450.674	187.396
62	2	450.595	187.523
62	3	450.745	187.381
62	4	450.667	187.791
62	5	450.637	187.686
62	6	451.27	188.022
63	0	40.237	189.024
63	1	39.247	188.739
63	2	39.131	188.892
63	3	38.636	190.073
63	4	38.537	189.105
63	5	38.72	188.815
64	0	375.062	191.058
64	1	376.547	191.573
64	2	375.487	191.122
64	3	376.616	191.063
64	4	376.023	191.192
64	5	375.771	191.068
64	6	375.881	191.202
64	7	375.606	191.174
64	8	375.678	191.169
64	9	375.97	190.643
64	10	375.061	190.811
64	11	375.124	190.881
64	12	375.298	191.083
64	13	375.476	190.635
64	14	375.446	190.536
64	15	375.479	190.703
64	16	375.142	190.992
64	17	375.089	190.997
64	18	375.809	190.63
64	19	376.349	189.821
64	20	376.371	190.054
64	21	375.083	190.619
65	0	364.162	192.18
65	1	365.434	190.808
65	2	364.413	189.638
65	3	365.489	190.469
66	0	325.634	194.492
66	1	324.166	192.333
66	2	322.943	191.308
67	0	4.082	199.513
67	1	4.573	198.946
68	0	347.742	203.45
68	1	346.778	203.717
69	0	102.085	208.14
69	1	101.104	207.824
70	0	373.814	210.307
70	1	373.675	210.489
70	2	371.859	210.307
71	0	79.449	211.616
71	1	79.348	211.271
72	0	349.798	217.835
72	1	351.141	218.343
73	0	173.931	219.287
73	1	174.367	218.42
73	2	172.309	217.499
74	0	181.478	220.515
74	1	181.52	220.535
74	2	181.605	220.747
74	3	182.101	222.908
74	4	181.684	222.417
74	5	180.295	224.117
74	6	181.391	223.855
74	7	182.266	223.575
74	8	183.556	225.005
74	9	183.058	225.875
74	10	183.813	226.037
74	11	184.608	226.713
74	12	183.748	225.992
74	13	184.432	227.487
74	14	185.346	228.39
74	15	185.735	228.175
74	16	185.289	227.545
74	17	184.751	228.246
74	18	185.286	227.921
74	19	185.657	228.27
74	20	185.514	228.475
74	21	185.349	227.738
74	22	186.195	228.47
74	23	185.638	228.531
74	24	185.536	228.58
74	25	185.905	228.285
74	26	186.241	228.253
74	27	185.735	228.177
74	28	186.364	226.621
74	29	185.738	228.504
74	30	185.634	228.591
74	31	186.211	228.867
74	32	186.194	229.012
74	33	186.106	228.489
74	34	185.586	229.255
74	35	186.162	229.261
74	36	185.709	229.054
74	37	186.234	229.232
74	38	185.841	228.494
74	39	185.773	228.605
74	40	186.228	228.371
74	41	186.287	228.561
74	42	185.645	229.283
74	43	186.545	229.088
74	44	186.196	229.264
74	45	184.574	227.038
74	46	186.129	229.091
74	47	186.232	228.974
74	48	185.587	229.332
74	49	185.71	229.211
75	0	334.035	219.94
75	1	333.815	220.278
75	2	334.233	220.484
75	3	333.686	220.426
75	4	333.711	220.294
75	5	334.326	220.556
76	0	123.149	222.582
76	1	123.045	222.544
76	2	122.445	222.591
76	3	122.76	222.004
76	4	123.218	223.158
76	5	122.641	222.305
76	6	122.385	222.326
76	7	122.545	222.725
76	8	121.835	222.476
76	9	122.212	222.404
76	10	122.245	223.075
76	11	121.864	222.814
76	12	122.214	222.743
76	13	121.658	222.844
76	14	121.966	222.294
76	15	121.913	222.439
76	16	121.782	222.409
76	17	122.521	222.537
76	18	121.886	222.712
76	19	122.454	223.099
76	20	122.389	222.742
76	21	122.238	222.645
76	22	122.498	223.096
76	23	122.819	222.631
76	24	122.456	222.712
76	25	122.582	222.472
76	26	123.241	223.108
77	0	147.738	225.862
77	1	147.672	226.027
77	2	147.763	226.004
77	3	147.693	226.038
77	4	148.333	225.83
78	0	184.635	227.556
78	1	185.201	228.995
78	2	185.073	227.993
78	3	185.261	229.214
78	4	184.952	228.188
78	5	185.337	228.113
78	6	185.392	228.364
78	7	185.315	226.889
78	8	185.401	228.422
79	0	369.085	227.373
79	1	370.707	225.453
79	2	370.55	222.769
79	3	373.142	222.688
80	0	139.211	230.577
80	1	138.095	229.557
80	2	139.247	230.303
80	3	138.572	229.462
80	4	138.165	229.569
81	0	237.377	230.633
81	1	237.262	230.508
81	2	237.181	230.881
82	0	142.66	238.87
82	1	142.236	237.326
82	2	141.901	236.997
82	3	142.737	237.347
83	0	217.071	237.677
83	1	217.47	237.65
83	2	217.349	238.033
83	3	216.522	238.381
83	4	216.948	237.577
83	5	217.053	237.531
83	6	217.741	237.406
83	7	216.973	238.411
84	0	238.811	237.431
84	1	239.424	237.289
84	2	239.377	237.34
84	3	239.284	237.637
84	4	239.749	238.401
85	0	158.842	238.787
85	1	159.39	238.29
85	2	162.096	238.647
86	0	390.177	238.458
86	1	390.521	239.604
86	2	390.932	239.482
87	0	41.864	244.287
87	1	41.059	244.637
88	0	307.012	245.814
88	1	306.544	246.398
89	0	200.336	247.706
89	1	200.517	247.511
90	0	268.52	251.042
90	1	267.591	250.515
91	0	331.488	254.359
91	1	331.31	254.528
91	2	331.501	254.387
92	0	370.125	257.773
92	1	370.491	258.054
92	2	371.078	257.508
92	3	370.588	257.487
92	4	370.568	257.695
92	5	370.646	257.751
93	0	280.392	258.209
93	1	281.02	258.474
93	2	281.836	258.097
93	3	282.069	258.365
94	0	325.328	258.65
94	1	324.179	258.847
95	0	357.628	259.376
95	1	358.113	258.54
95	2	358.11	256.828
95	3	359.149	255.829
95	4	358.832	256.463
95	5	356.893	257.505
96	0	378.893	259.734
96	1	378.319	259.23
96	2	378.723	260.503
97	0	244.902	261.703
97	1	243.709	262.606
98	0	132.185	263.143
98	1	132.343	263.351
99	0	349.014	263.778
99	1	348.834	263.486
100	0	124.333	265.87
100	1	124.363	265.899
100	2	124.655	265.964
101	0	401.34	269.616
101	1	401.568	271.426
101	2	401.699	271.895
101	3	401.656	271.908
101	4	403.196	270.48
101	5	400.824	271.141
101	6	401.675	271.59
101	7	401.795	272.063
101	8	401.443	269.918
101	9	401.709	270.823
101	10	402.012	272.107
101	11	402.536	272.211
101	12	401.057	271.261
101	13	401.503	271.302
101	14	401.409	271.342
101	15	401.51	271.794
101	16	402.205	272.217
101	17	401.546	271.761
101	18	401.25	272.386
101	19	401.943	271.811
101	20	401.443	272.042
101	21	401.711	271.744
101	22	401.701	271.557
101	23	401.917	271.743
101	24	402.013	272.191
101	25	402.206	272.86
101	26	401.732	272.566
101	27	401.103	272.748
101	28	401.593	272.014
101	29	401.652	271.876
101	30	401.667	272.535
101	31	401.411	272.433
101	32	401.794	272.558
101	33	402.094	272.975
101	34	401.792	271.512
102	0	173.175	280.541
102	1	172.997	280.37
102	2	173.011	280.69
102	3	172.99	280.904
102	4	173.243	280.821
102	5	172.893	280.952
102	6	172.839	280.826
102	7	172.833	280.776
102	8	173.059	280.919
102	9	173.287	280.941
102	10	173.012	280.673
102	11	172.753	280.588
102	12	172.753	280.952
102	13	173.296	280.567
102	14	173.07	281.05
102	15	173.169	280.736
102	16	172.888	281.276
103	0	316.689	285.512
103	1	316.905	285.432
103	2	316.187	286.046
103	3	316.368	285.804
103	4	316.549	285.903
103	5	315.692	287.194
103	6	316.083	287.733
103	7	316.064	287.408
103	8	316.184	287.357
103	9	315.771	287.7
103	10	315.478	287.483
103	11	316.259	287.284
103	12	315.916	287.657
103	13	315.967	286.472
103	14	315.762	286.369
103	15	317.337	285.466
103	16	318.032	285.119
103	17	317.785	284.692
103	18	316.779	283.937
103	19	317.722	286.483
103	20	318.351	286.618
103	21	319.289	287.104
103	22	320.927	286.404
103	23	320.965	286.31
104	0	99.519	296.661
104	1	99.763	296.837
104	2	100.216	296.423
104	3	99.277	297.026
104	4	99.683	296.728
104	5	100.067	296.769
104	6	99.704	296.385
104	7	99.449	296.064
104	8	100.121	296.972
104	9	99.431	296.742
104	10	100.039	297.175
105	0	191.019	296.004
105	1	193.089	297.108
105	2	193.023	297.171
105	3	190.947	295.524
105	4	191.399	295.588
105	5	190.86	295.868
105	6	191.727	296.255
105	7	190.94	295.021
105	8	191.049	295.435
106	0	48.036	314.117
106	1	47.899	314.384
106	2	48.264	313.772
106	3	47.861	314.025
106	4	47.928	313.656
106	5	47.612	314.099
106	6	47.885	313.801
106	7	47.809	314.171
106	8	48.321	314.399
106	9	48.031	313.921
106	10	48.402	313.966
106	11	48.319	313.903
106	12	48.396	314.023
106	13	48.232	313.801
106	14	48.183	313.652
106	15	48.226	314.145
106	16	47.682	314.333
106	17	47.594	314.141
106	18	47.777	314.572
106	19	47.736	314.069
106	20	48.365	313.848
106	21	47.982	313.808
106	22	47.596	313.771
106	23	48.176	314.041
106	24	47.793	314.261
106	25	47.662	314.144
106	26	47.911	314.178
106	27	48.215	313.975
106	28	48.133	313.86
106	29	48.526	313.525
106	30	48.102	313.6
106	31	48.323	314.456
106	32	47.837	313.786
106	33	48.05	314.103
106	34	48.319	314.11
106	35	47.904	313.965
106	36	47.65	314.04
106	37	48.526	314.245
106	38	48.352	314.443
106	39	48.201	313.528
106	40	48.025	313.894
106	41	48.248	314.04
106	42	47.934	314.06
106	43	48.311	313.538
106	44	48.481	313.884
106	45	48.321	313.301
106	46	48.585	314.235
106	47	48.197	313.863
106	48	48.019	313.903
106	49	47.985	314.186
107	0	341.824	318.621
107	1	341.746	318.349
107	2	341.618	318.45
107	3	340.986	317.496
108	0	446.245	319.71
108	1	447.644	321.425
108	2	446.105	320.978
108	3	445.532	321.859
109	0	214.508	320.518
109	1	215.258	318.357
109	2	215.572	320.248
109	3	215.455	319.454
110	0	200.097	330.221
110	1	200.451	329.486
110	2	200.246	329.592
110	3	199.552	330.168
110	4	200.516	329.488
110	5	200.144	329.729
110	6	199.919	329.641
111	0	214.989	338.786
111	1	215.679	339.158
112	0	375.672	342.251
112	1	375.552	341.937
112	2	376.199	342.473
113	0	139.455	348.03
113	1	138.307	347.512
114	0	337.33	351.811
114	1	337.462	350.28
115	0	201.598	357.367
115	1	200.713	357.96
115	2	200.418	357.553
115	3	201.288	357.347
115	4	200.591	357.554
116	0	369.129	368.448
116	1	369.253	368.7
116	2	369.192	368.484
116	3	369.31	368.445
116	4	369.26	368.671
116	5	369.345	368.55
116	6	369.447	369.092
116	7	369.251	368.8
116	8	369.642	369.055
116	9	369.565	368.371
116	10	369.553	368.7
117	0	223.855	381.566
117	1	223.689	380.268
118	0	352.772	395.942
118	1	353.522	393.757
118	2	353.253	394.863
118	3	353.244	395.315
118	4	353.216	396.134
118	5	353.538	396.194
118	6	352.622	396.549
118	7	353.376	396.454
119	0	190.337	400.543
119	1	190.16	401.253
119	2	190.094	401.313
119	3	191.005	400.492
119	4	190.173	400.689
119	5	188.98	400.246
119	6	188.54	397.904
119	7	189.587	398.877
119	8	189.639	399.258
120	0	268.056	425.503
120	1	268.216	425.098
121	0	84.344	430.142
121	1	84.619	430.24
121	2	84.199	430.097
121	3	84.302	430.374
121	4	84.498	430.107
121	5	84.621	430.237
121	6	84.692	429.976
122	0	241.51	440.474
122	1	242.907	440.573
123	0	247.151	448.327
123	1	247.7	448.416
123	2	247.33	448.617
123	3	247.412	447.949
123	4	247.366	448.21
123	5	246.983	448.577
123	6	247.398	448.528
123	7	247.713	449.018
123	8	247.267	448.389
123	9	247.161	448.091
123	10	247.189	448.156
123	11	247.294	448.78
123	12	247.088	448.195
123	13	246.893	448.3
123	14	247.379	448.302
123	15	247.736	448.515
124	0	162.645	454.057
124	1	162.453	454.171
124	2	162.548	454.247
124	3	162.656	454.15
124	4	162.709	454.156
124	5	162.512	453.931
124	6	162.289	454.073
124	7	162.617	454.083
124	8	162.66	454.17
124	9	162.722	454.02
124	10	162.528	454.105
124	11	162.808	454.343
124	12	162.398	454.22
124	13	162.468	453.997
124	14	162.767	453.926
125	0	249.927	489.896
125	1	250.034	489.977
125	2	250.046	490.23
125	3	249.835	489.935
125	4	250.043	489.89
125	5	250.099	489.975
125	6	250.162	490.285
125	7	250.197	489.865
125	8	249.941	490.013
125	9	249.797	490.186
125	10	249.894	490.167
125	11	249.955	489.789
125	12	249.983	490.006
125	13	250.007	489.758
125	14	249.814	489.966
125	15	249.87	489.875
125	16	249.942	490.243
125	17	249.92	489.937
125	18	249.895	489.857
125	19	250.24	489.733
125	20	250.244	489.94
125	21	250.017	489.858
125	22	250.182	489.763
125	23	249.862	489.953
125	24	249.635	489.735
125	25	249.709	490.071
125	26	250.012	489.885
125	27	250.038	489.702
125	28	249.646	490.194
125	29	249.953	489.889
125	30	250.232	490.069
125	31	249.822	490.011
125	32	249.907	489.818
125	33	250.177	489.815
125	34	249.58	489.984
125	35	249.983	490.199
125	36	249.773	489.689
125	37	250.025	489.894
125	38	249.882	490.071
125	39	250.166	489.963
125	40	249.948	489.99
125	41	249.774	490.032
125	42	249.763	490.429
125	43	249.951	489.911
125	44	249.986	490.187
125	45	250.127	489.944
125	46	249.833	489.693
125	47	249.803	490.115
125	48	250.039	489.973
125	49	249.792	490.149
126	0	472.131	493.274
126	1	472.38	493.307
126	2	472.246	493.576
126	3	472.384	493.424
126	4	472.339	493.253
126	5	472.426	493.243
126	6	472.798	493.127
126	7	472.302	493.147
126	8	472.145	493.607
126	9	472.28	493.29
126	10	472.265	493.443
126	11	472.559	493.413
126	12	472.447	493.179
126	13	471.858	493.47
126	14	472.326	493.325
126	15	472.172	493.285
126	16	472.175	493.56
126	17	472.69	493.274
126	18	472.448	493.209
126	19	472.418	493.284
126	20	472.391	493.551
126	21	472.238	493.584
126	22	472.384	493.523
126	23	472.485	493.347
126	24	472.332	493.555
126	25	472.028	493.086
126	26	472.43	493.201
126	27	472.379	493.305
126	28	472.156	493.437
126	29	472.389	493.233
126	30	472.457	493.495
126	31	472.188	493.576
126	32	472.24	493.465
126	33	472.318	493.157
126	34	472.527	493.511
126	35	472.521	493.551
126	36	472.325	493.254
126	37	472.178	493.328
126	38	472.011	493.495
126	39	472.337	493.327
126	40	472.348	493.276
126	41	472.154	493.269
126	42	472.574	493.045
126	43	472.406	493.35
126	44	472.14	493.281
126	45	472.426	493.349
126	46	472.088	493.368
126	47	472.149	493.301
126	48	472.142	493.264
126	49	472.129	493.148
127	0	210.164	500.866
127	1	210.176	501.045
127	2	210.328	501.197
127	3	210.124	501.18
127	4	210.099	501.262
127	5	210.095	501.179
127	6	210.28	501.129
127	7	210.141	501.006
127	8	210.399	500.992
127	9	210.432	501.093
127	10	210.256	501.107
127	11	210.547	501.006
127	12	210.292	501.13
127	13	210.318	500.985
127	14	210.383	501.091
127	15	210.307	501.274
127	16	210.316	501.095
127	17	210.497	501.288
127	18	210.143	501.012
127	19	210.226	500.952
127	20	210.106	500.968
127	21	210.105	501.137
127	22	209.946	501.298
127	23	210.416	500.907
127	24	210.423	501.028
127	25	210.094	501.219
127	26	210.432	501.247
127	27	210.184	501.18
127	28	210.5	500.769
127	29	210.222	500.916
127	30	210.28	501.193
127	31	210.358	501.24
127	32	210.332	500.858
127	33	210.541	500.861
127	34	210.059	501.137
127	35	210.14	501.259
127	36	210.144	501.069
127	37	210.22	501.139
127	38	210.541	500.799
127	39	210.195	500.838
127	40	210.116	500.929
127	41	210.556	501.502
127	42	209.973	501.301
127	43	210.467	501.076
127	44	210.383	500.97
127	45	210.424	501.11
127	46	210.462	501.038
127	47	210.141	501.409
127	48	209.7	501.544
127	49	210.479	501.096
128	1	262.522	7.167
128	2	263.639	7.005
128	3	263.459	7.593
128	4	263.239	7.495
128	5	263.314	7.763
128	6	263.512	7.718
129	1	439.802	10.598
129	2	439.531	12.269
130	1	155.225	40.649
130	2	155.222	40.844
130	3	155.103	40.891
130	4	155.486	40.529
131	1	281.158	41.5
131	2	280.688	41.308
131	3	282.934	42.98
132	1	168.485	70.079
132	2	168.935	68.889
132	3	168.535	69.806
132	4	168.678	68.702
132	5	168.846	69.301
132	6	168.499	69.15
132	7	168.587	69.377
132	8	167.643	70.167
132	9	167.575	69.312
133	1	290.743	77.318
133	2	291.517	77.484
134	1	313.495	83.265
134	2	314.549	83.266
135	1	380.165	123.688
135	2	380.775	123.29
136	1	291.572	131.943
136	2	292.329	132.778
136	3	293.55	134.29
137	1	296.136	143.174
137	2	296.236	141.641
138	1	158.679	161.837
138	2	157.683	163.603
138	3	156.241	164.615
138	4	158.556	165.162
139	1	168.442	171.653
139	2	168.094	169.898
140	1	258.183	171.632
140	2	257.774	171.775
140	3	257.945	171.514
140	4	258.118	171.231
140	5	258.288	171.502
140	6	258.213	171.892
141	1	266.007	181.176
141	2	266.329	181.644
141	3	266.218	182.357
142	1	320.535	184.335
142	2	320.77	183.718
143	1	470.531	184.218
143	2	470.924	184.021
143	3	470.811	184.78
143	4	470.35	184.169
143	5	470.944	184.806
143	6	470.335	184.797
143	7	470.501	184.273
143	8	470.546	184.865
144	1	409.625	192.629
144	2	409.407	191.362
145	1	182.716	214.525
145	2	183.517	213.553
145	3	184.5	211.284
146	1	310.23	218.277
146	2	310.647	217.385
146	3	312.047	218.787
146	4	312.599	217.513
146	5	312.381	219.341
146	6	312.988	219.763
147	1	372.72	232.149
147	2	372.248	232.218
148	1	86.226	241.708
148	2	86.275	242.073
148	3	86.438	241.731
149	1	73.325	249.142
149	2	73.821	249.376
149	3	74.034	249.505
149	4	73.479	249.289
149	5	73.663	249.325
149	6	73.717	249.43
150	1	113.112	250.172
150	2	113.656	249.837
150	3	113.453	250.148
151	1	164.739	255.34
151	2	164.642	255.098
151	3	163.027	254.676
151	4	164.607	255.991
151	5	164.817	254.255
151	6	167.633	254.304
151	7	167.306	255.509
152	1	308.849	258.623
152	2	308.867	258.542
152	3	310.475	258.758
152	4	309.781	258.024
152	5	310.048	258.063
152	6	310.629	259.018
153	1	330.622	277.748
153	2	329.484	277.633
154	1	390.72	315.345
154	2	390.932	315.013
155	1	201.987	322.462
155	2	203.979	321.502
155	3	202.184	323.693
156	1	348.455	334.108
156	2	347.356	333.17
156	3	348.009	334.756
156	4	348.115	335.802
156	5	347.742	335.441
157	1	348.946	344.19
157	2	347.6	345.667
157	3	347.11	344.234
157	4	346.904	344.27
157	5	347.43	344.093
157	6	347.534	343.99
157	7	346.638	344.447
157	8	347.2	344.011
157	9	347.492	344.162
157	10	347.286	344.009
157	11	347.463	344.224
157	12	347.242	344.183
157	13	347.191	344.363
157	14	347.316	344.385
157	15	347.086	343.509
158	1	190.193	359.218
158	2	192.1	359.551
158	3	190.764	358.769
158	4	190.529	358.048
159	1	437.685	507.1
159	2	437.651	507.163
160	2	325.311	35.485
160	3	325.186	34.704
160	4	325.717	35.742
160	5	325.283	35.45
160	6	325.359	35.273
160	7	325.607	35.052
160	8	324.445	33.235
160	9	324.35	32.236
160	10	324.263	32.697
160	11	324.354	32.749
160	12	324.559	33.045
160	13	324.757	33.399
160	14	325.002	34.344
160	15	324.322	34.437
160	16	324.55	33.437
160	17	324.306	32.872
160	18	324.259	31.701
160	19	324.421	34.082
161	2	301.205	42.197
161	3	300.531	41.223
162	2	449.539	47.595
162	3	450.695	48.505
163	2	146.184	91.136
163	3	146.031	91.086
164	2	246.492	104.711
164	3	245.816	104.183
165	2	167.606	116.539
165	3	167.203	116.264
165	4	167.59	116.219
165	5	167.286	115.803
166	2	338.484	143.886
166	3	339.657	145.743
166	4	339.547	145.576
167	2	353.817	144.538
167	3	353.764	145.342
167	4	353.586	145.125
167	5	353.807	145.148
167	6	353.915	144.982
167	7	353.752	145.285
167	8	353.76	145.462
167	9	353.913	145.605
167	10	353.603	145.05
167	11	353.446	144.985
167	12	354.372	144.811
167	13	353.685	145.198
167	14	354.055	145.404
167	15	354.292	145.169
167	16	353.702	145.534
167	17	353.635	145.09
167	18	353.909	145.163
167	19	353.998	145.133
167	20	353.914	145.092
167	21	353.72	145.275
167	22	353.74	145.244
167	23	353.907	145.456
167	24	353.546	145.358
167	25	353.811	145.596
167	26	353.745	145.275
167	27	353.715	145.159
167	28	353.556	145.714
167	29	353.529	145.346
167	30	353.603	145.45
167	31	354.017	145.269
167	32	353.762	144.881
167	33	353.298	145.4
167	34	353.78	145.133
167	35	353.611	145.423
167	36	353.515	145.178
167	37	353.755	145.291
167	38	353.783	145.389
167	39	353.626	145.092
167	40	353.684	144.091
167	41	353.652	144.202
167	42	353.98	143.093
167	43	354.406	144.183
167	44	355.001	144.642
167	45	354.992	143.499
167	46	354.553	144.251
167	47	354.295	144.145
167	48	354.743	144.132
167	49	353.937	145.369
168	2	260.213	161.288
168	3	261.238	161.746
168	4	260.411	160.692
168	5	260.864	161.154
169	2	140.86	164.932
169	3	141.847	164.674
169	4	141.677	164.059
170	2	386.289	192.256
170	3	386.589	192.294
170	4	386.672	192.314
170	5	386.771	192.344
170	6	386.92	192.248
171	2	103.072	204.533
171	3	102.513	205.432
171	4	102.8	204.431
171	5	102.482	205.755
171	6	101.253	206.727
172	2	204.398	210.236
172	3	206.237	209.756
172	4	207.107	209.641
172	5	207.496	209.727
173	2	431.844	210.163
173	3	432.8	210.263
174	2	424.138	213.211
174	3	424.549	213.407
175	2	160.877	228.489
175	3	160.663	227.539
175	4	163.276	226.873
175	5	163.241	227.622
176	2	420.256	232.266
176	3	420.633	231.71
176	4	420.788	232.044
176	5	420.642	232.188
176	6	421.053	231.805
176	7	420.962	231.784
176	8	420.986	231.563
176	9	420.835	231.893
176	10	420.475	231.658
176	11	420.435	231.976
176	12	420.641	231.729
176	13	420.389	232.017
176	14	420.566	231.772
176	15	420.47	231.831
176	16	420.465	231.844
176	17	420.522	231.664
176	18	420.248	231.452
176	19	420.653	231.662
176	20	420.823	231.533
176	21	420.521	231.566
176	22	420.962	231.486
176	23	420.594	231.767
176	24	421.061	231.683
176	25	420.918	231.801
176	26	420.856	231.632
176	27	420.774	231.758
176	28	420.947	231.326
176	29	420.504	232.26
176	30	420.554	231.784
176	31	420.459	232.01
176	32	420.84	231.956
176	33	420.737	232.208
176	34	420.849	231.883
176	35	421.043	231.611
176	36	420.529	231.795
176	37	420.586	231.727
176	38	420.623	232.002
176	39	420.629	231.894
176	40	420.84	231.839
176	41	420.378	231.863
176	42	420.364	231.972
176	43	420.497	231.677
176	44	420.235	232.067
176	45	420.69	231.74
176	46	420.615	231.76
176	47	420.513	231.768
176	48	420.661	231.819
176	49	420.47	231.703
177	2	386.414	233.549
177	3	386.049	233.492
177	4	386.226	233.376
178	2	442.758	236.274
178	3	441.697	236.499
179	2	380.025	242.801
179	3	380.825	244.442
179	4	380.458	244.476
179	5	380.721	245.922
180	2	197.622	256.298
180	3	197.453	256.383
181	2	374.315	261.691
181	3	374.278	261.766
182	2	80.142	276.416
182	3	81.147	276.889
183	2	154.891	285.386
183	3	154.552	285.192
183	4	153.293	283.217
183	5	153.426	283.939
184	2	221.818	285.494
184	3	220.532	285.754
185	2	305.527	300.256
185	3	307.929	299.94
186	2	304.216	306.777
186	3	304.701	305.933
187	2	187.482	308.847
187	3	187.283	308.739
187	4	186.662	308.43
187	5	186.254	308.134
188	2	113.624	321.224
188	3	114.454	322.406
188	4	112.963	322.683
189	2	305.341	337.9
189	3	305.421	338.989
189	4	305.492	337.898
189	5	304.697	338.675
189	6	305.433	338.5
189	7	305.228	338.671
190	2	226.287	341.839
190	3	226.371	341.576
191	2	199.632	445.921
191	3	199.652	445.464
192	2	165.762	466.908
192	3	165.729	467.098
192	4	166.263	467.622
193	2	367.875	469.428
193	3	367.299	469.666
193	4	367.149	469.648
193	5	367.003	469.495
193	6	367.259	469.5
193	7	367.633	469.769
193	8	366.853	469.404
193	9	367.181	469.713
193	10	367.197	469.373
194	3	134.778	46.54
194	4	134.398	46.929
195	3	260.26	67.756
195	4	259.315	69.913
196	3	247.3	82.24
196	4	246.703	82.178
196	5	247.507	82.277
196	6	247.224	82.021
196	7	247.709	81.955
197	3	374.571	90.274
197	4	374.798	90.119
198	3	133.367	100.811
198	4	135.112	99.245
199	3	161.586	109.224
199	4	161.926	109.468
199	5	162.289	109.262
199	6	162.218	108.815
200	3	302.824	139.573
200	4	302.589	141.137
200	5	301.997	141.733
200	6	302.429	142.559
200	7	302.356	143.255
200	8	301.47	142.344
200	9	302.209	142.07
201	3	158.794	143.562
201	4	158.613	143.117
202	3	387.926	143.175
202	4	388.281	143.402
202	5	387.711	142.798
203	3	129.056	144.463
203	4	127.913	145.562
203	5	128.588	145.491
204	3	419.614	158.577
204	4	420.728	159.417
204	5	420.603	159.385
204	6	420.963	160.466
204	7	421.284	161.285
205	3	184.651	162.331
205	4	185.421	162.464
206	3	146.941	170.573
206	4	148.153	170.381
206	5	147.37	170.802
207	3	164.39	170.935
207	4	164.872	171.589
207	5	164.288	171.592
208	3	371.227	196.968
208	4	372.192	196.146
208	5	371.526	197.886
209	3	4.483	199.601
209	4	4.502	199.531
209	5	4.442	199.247
209	6	3.975	199.753
210	3	344.325	200.181
210	4	344.667	201.388
211	3	136.439	217.218
211	4	136.705	217.505
211	5	139.623	217.572
211	6	139.428	216.648
211	7	137.38	216.958
211	8	137.049	217.026
211	9	137.705	216.765
211	10	137.619	216.784
211	11	137.25	217.174
212	3	93.788	219.697
212	4	93.556	220.005
213	3	134.841	234.743
213	4	135.855	234.706
213	5	135.386	233.802
213	6	136.642	231.866
213	7	134.648	231.717
213	8	133.793	231.9
213	9	133.169	232.159
214	3	324.551	236.625
214	4	323.818	236.959
214	5	326.401	235.458
214	6	327.219	234.206
215	3	378.025	239.588
215	4	377.499	239.497
215	5	377.263	239.351
215	6	376.856	239.941
215	7	377.551	239.767
215	8	377.534	239.624
215	9	377.539	239.731
215	10	375.469	240.6
215	11	376.357	240.819
215	12	376.139	242.094
216	3	94.38	243.272
216	4	94.784	240.518
216	5	95.031	240.249
217	3	294.942	248.689
217	4	294.275	248.819
218	3	324.783	260.188
218	4	324.407	261.033
218	5	322.279	259.455
218	6	322.214	259.603
218	7	321.477	259.701
218	8	322.136	261.265
218	9	321.918	262.631
219	3	83.758	267.744
219	4	84.235	267.738
220	3	219.003	315.492
220	4	219.407	314.905
220	5	219.228	315.461
221	3	203.273	342.813
221	4	203.11	342.764
222	3	139.562	347.621
222	4	140.26	346.605
223	4	439.75	11.586
223	5	440.186	10.513
224	4	265.958	23.559
224	5	267.647	21.185
225	4	258.236	29.612
225	5	257.498	30.681
225	6	258.096	27.958
225	7	258.593	27.506
225	8	258.681	27.244
225	9	259.305	27.637
226	4	372.273	54.44
226	5	373.409	54.592
227	4	277.276	58.314
227	5	275.5	58.262
227	6	274.233	56.835
227	7	273.643	56.198
228	4	265.974	78.4
228	5	265.799	79.414
228	6	265.188	77.816
228	7	265.882	78.263
228	8	265.804	79.369
228	9	265.274	77.483
228	10	263.816	76.388
228	11	263.709	76.292
229	4	284.397	91.391
229	5	285.442	91.987
230	4	310.222	92.036
230	5	309.707	92.619
231	4	193.82	102.099
231	5	194.595	101.574
232	4	180.787	103.623
232	5	180.543	101.196
233	4	121.832	107.436
233	5	122.213	106.475
233	6	121.968	106.283
234	4	294.032	129.23
234	5	293.962	130.649
235	4	375.446	148.629
235	5	375.638	147.97
235	6	375.774	148.31
235	7	375.886	148.061
235	8	375.738	148.077
235	9	375.358	148.111
235	10	375.604	147.992
236	4	330.257	158.861
236	5	329.06	159.008
236	6	329.772	158.422
237	4	325.224	160.773
237	5	325.431	160.463
237	6	325.122	160.452
237	7	325.412	160.637
237	8	325.083	160.345
237	9	324.826	160.678
237	10	325.239	160.509
237	11	324.678	160.349
237	12	325.031	160.216
238	4	253.428	161.486
238	5	255.804	162.338
238	6	255.33	162.522
238	7	256.551	163.006
239	4	101.761	182.838
239	5	100.819	184.414
240	4	224.318	188.282
240	5	224.171	188.054
240	6	224.273	188.072
240	7	224.36	187.875
240	8	224.221	188.202
240	9	224.231	188.259
240	10	224.445	188.122
240	11	224.158	188.336
240	12	224.216	187.835
240	13	224.227	188.092
240	14	224.048	187.934
240	15	224.392	188.16
240	16	224.329	188.136
240	17	224.529	188.506
240	18	224.464	188.252
240	19	224.255	188.512
240	20	224.364	187.973
240	21	224.354	188.057
240	22	224.417	187.964
240	23	224.101	188.057
240	24	224.243	188.018
240	25	224.285	188.102
240	26	224.3	188.121
240	27	224.299	188.151
240	28	224.252	188.114
240	29	224.306	188.349
240	30	224.305	188.268
240	31	224.437	188.259
240	32	224.16	188.198
240	33	224.394	188.06
240	34	224.3	188.031
240	35	224.273	188.226
240	36	224.225	188.195
240	37	223.917	188.04
240	38	224.078	188.246
240	39	224.089	188.142
240	40	224.358	188.16
240	41	224.229	188.155
240	42	224.1	188.142
240	43	224.355	188.273
240	44	224.515	188.158
240	45	224.245	188.31
240	46	224.364	188.226
240	47	224.298	188.076
240	48	224.109	188.221
240	49	224.137	188.326
241	4	322.724	187.307
241	5	321.305	189.295
241	6	322.431	189.556
241	7	322.336	190.857
242	4	334.183	192.813
242	5	336.245	192.631
242	6	335.871	193.368
242	7	335.995	192.165
242	8	335.381	189.877
242	9	334.794	191.679
242	10	335.009	191.324
242	11	335.319	190.55
242	12	335.03	189.484
243	4	460.033	193.679
243	5	460.266	194.011
243	6	459.664	192.96
243	7	460.531	193.33
243	8	460.685	193.811
243	9	460.236	193.643
243	10	460.064	193.655
243	11	460.351	193.364
244	4	401.835	201.488
244	5	400.663	200.344
245	4	476.207	206.545
245	5	475.639	205.442
246	4	181.378	208.647
246	5	180.533	209.577
246	6	180.99	210.359
246	7	182.197	210.667
247	4	352.325	219.066
247	5	351.255	219.774
247	6	351.263	221.297
248	4	369.844	220.107
248	5	369.683	220.696
248	6	370.625	219.111
249	4	162.101	238.735
249	5	162.479	238.92
249	6	163.354	238.674
250	4	176.503	238.684
250	5	174.825	237.719
250	6	174.781	236.928
250	7	174.74	237.098
250	8	175.576	238.103
250	9	176.574	237.699
250	10	175.766	237.282
250	11	175.022	237.36
250	12	174.584	236.326
251	4	389.697	239.427
251	5	390.458	240.238
252	4	397.359	248.128
252	5	397.694	248.469
252	6	398.604	248.518
253	4	347.688	253.65
253	5	348.684	251.643
254	4	349.572	262.717
254	5	349.351	263.455
254	6	348.91	262.711
254	7	349.265	263.543
254	8	349.137	263.66
255	4	67.233	280.871
255	5	66.943	281.329
256	4	408.411	286.568
256	5	407.455	285.5
257	4	247.22	301.236
257	5	247.705	301.697
258	4	297.59	304.303
258	5	297.674	303.773
258	6	297.439	303.74
259	4	128.685	317.439
259	5	128.489	318.322
259	6	127.338	319.171
260	4	214.044	330.693
260	5	215.331	330.513
261	4	124.704	332.824
261	5	124.754	333.302
261	6	124.963	333.003
261	7	124.973	333.422
[truncated: 6,240 more rows]
